# Supplementary material for: Expression of the RNA-binding protein RBP10 promotes the bloodstream-form differentiation state in Trypanosoma brucei
Source: PubMed Central journal article supplement (PMC5568443; doi:10.1371/journal.ppat.1006560), 2017-08-11

### A. Expression of lambdaN fusion proteins

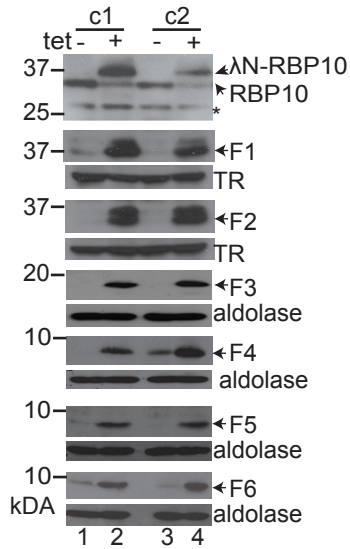

### B. Bloodstream form TAP-RBP10 cell line

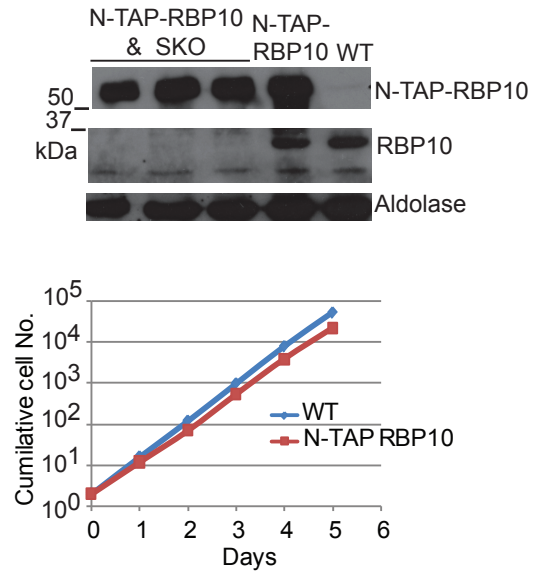

### C. Scatter plot: average RPMs for bound and unbound RNAs

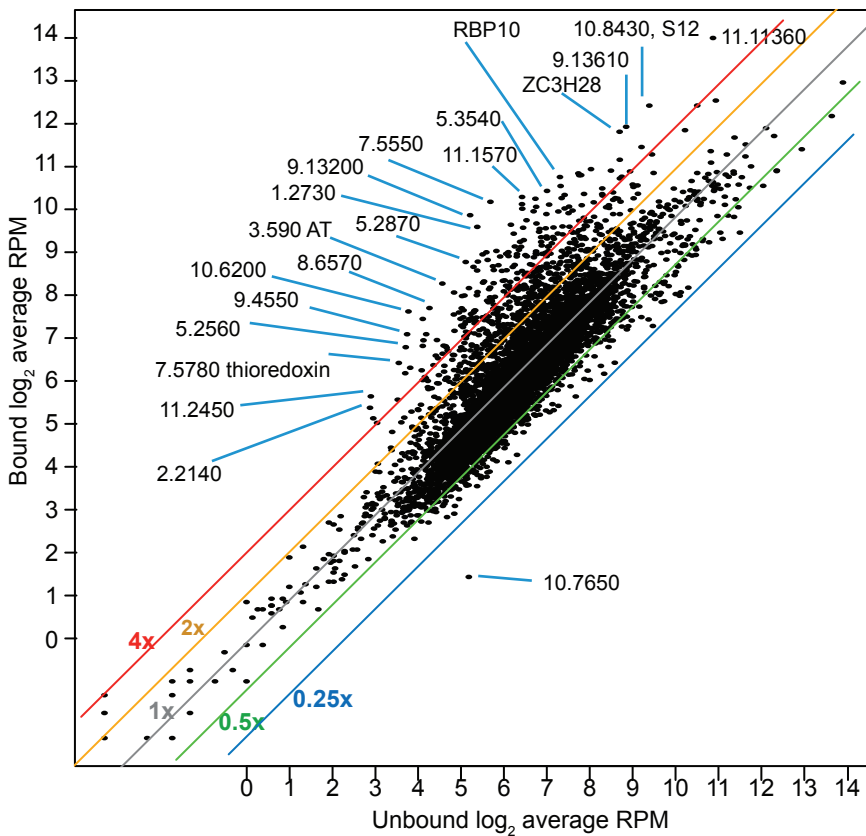

### D. Numbers of genes with different ratios of bound/unbound RNA

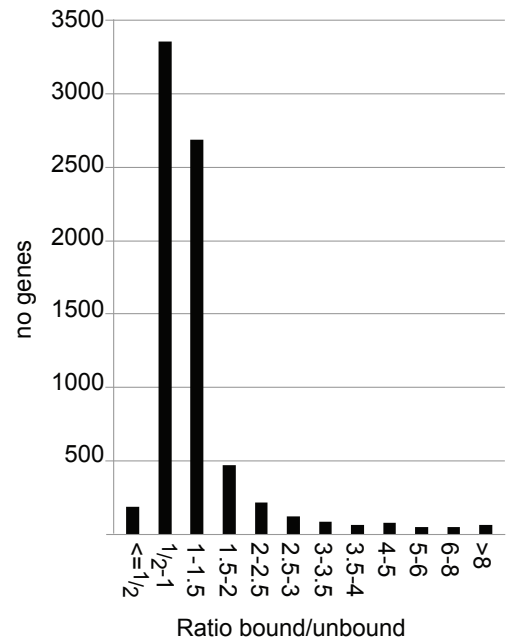

### E. Bloodstream form RNAi

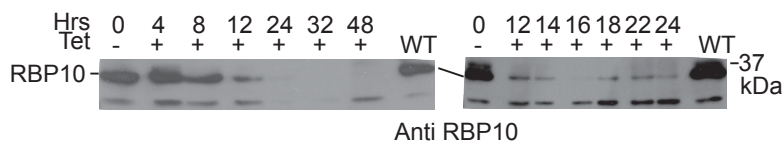

### F. Procyclic form inducible expression of RBP10-myc

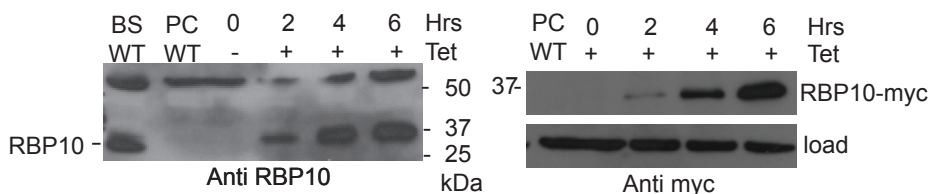

Supplement: ppat.1006560.s005.pdf [file ppat.1006560.s005.pdf]
