# Supplementary material for: Expression of the RNA-binding protein RBP10 promotes the bloodstream-form differentiation state in Trypanosoma brucei
Source: PubMed Central journal article supplement (PMC5568443; doi:10.1371/journal.ppat.1006560), 2017-08-11

# A. Sequence alignment

Tgr - *Trypanosoma grayi* - Tgr.602.1000 (partial sequence)  
 Tcr - *T. cruzi* - TCSYLIVIO\_000120  
 Tco - *T. congolense* - TcIL3000\_8\_2670  
 Tbr - *T. brucei* - Tb927.8.2780  
 Tv - *T. vivax* TvY486\_0802280

Ble - *Blechnomonas ayalai* - Baya\_116\_0210  
 Lsey - *Leptomonas seymori* - Lsey\_0070\_0140  
 Lmj - *Leishmania major* - LmjF.23.0730  
 End - *Endotrypanum monterozeii* - EMOLV88\_230013800  
 Cri - *Crithidia fasciculata* - CFAC1\_150018500

Basic  
 Acidic  
 Polar  
 Aromatic  
 Non-polar

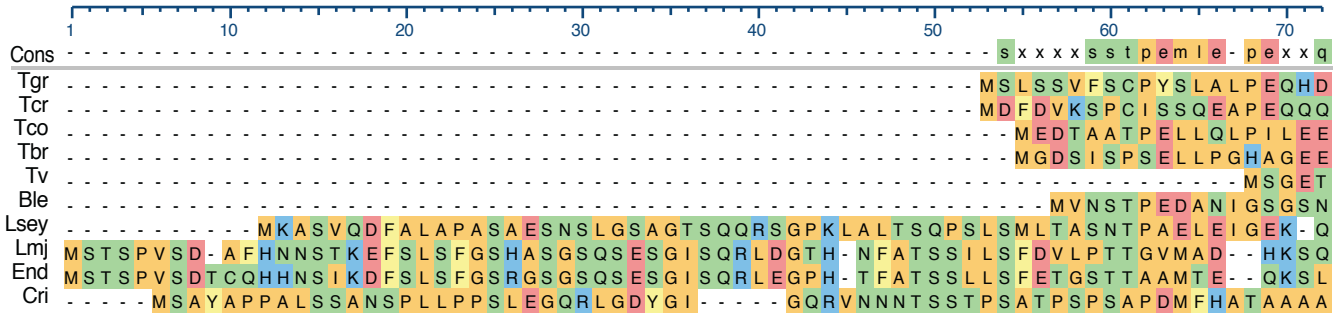

**RNP2**

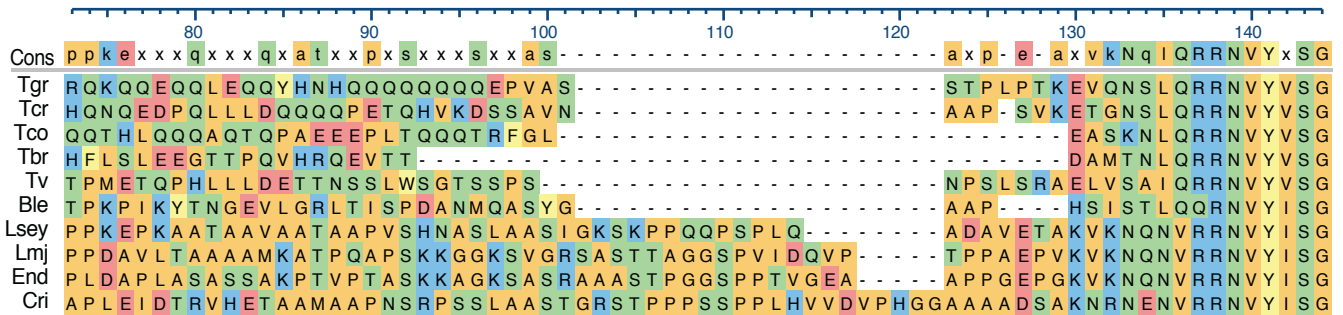

**RNP1**

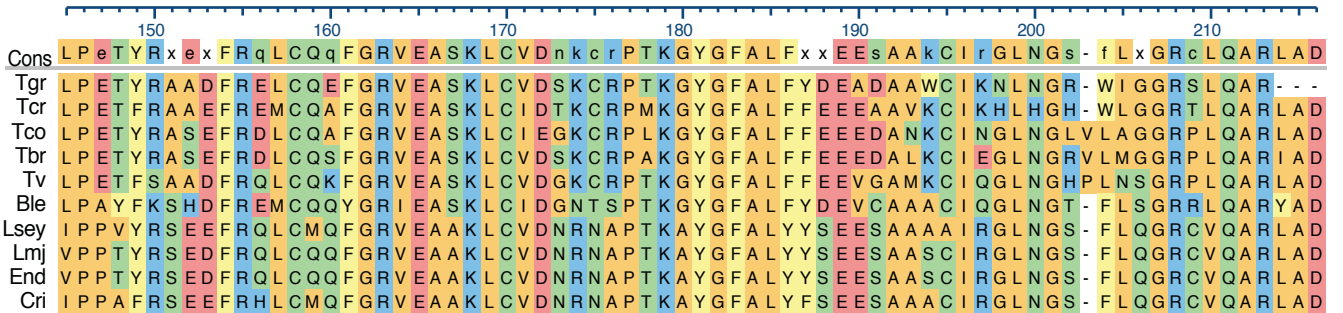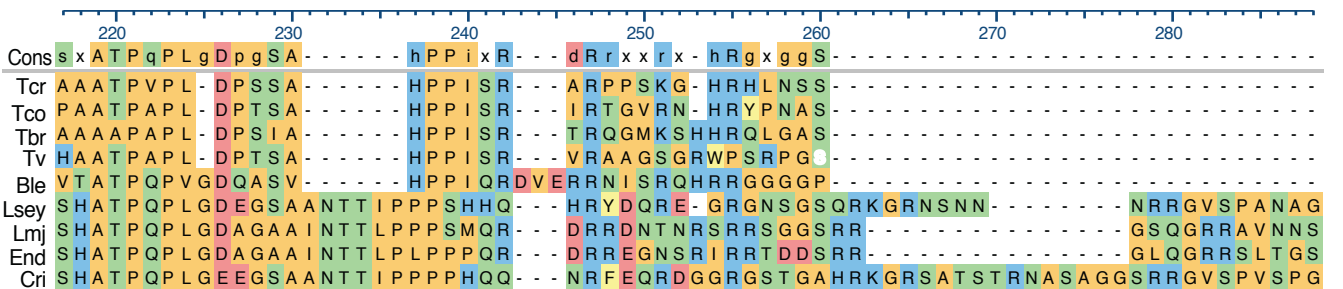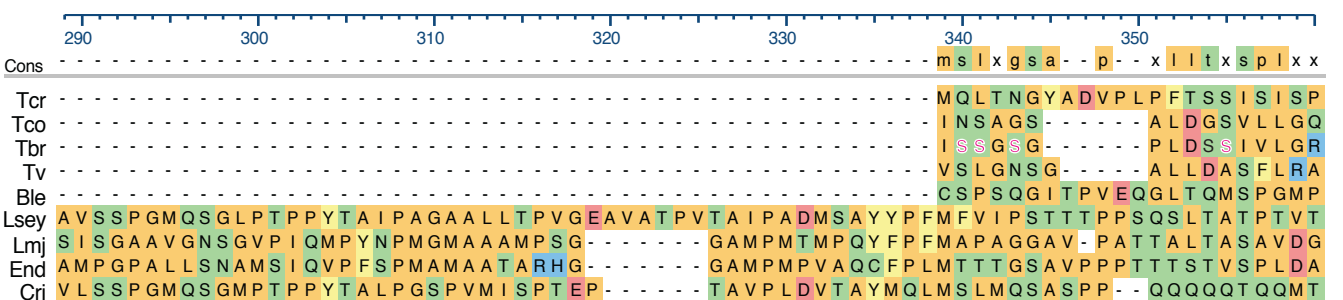

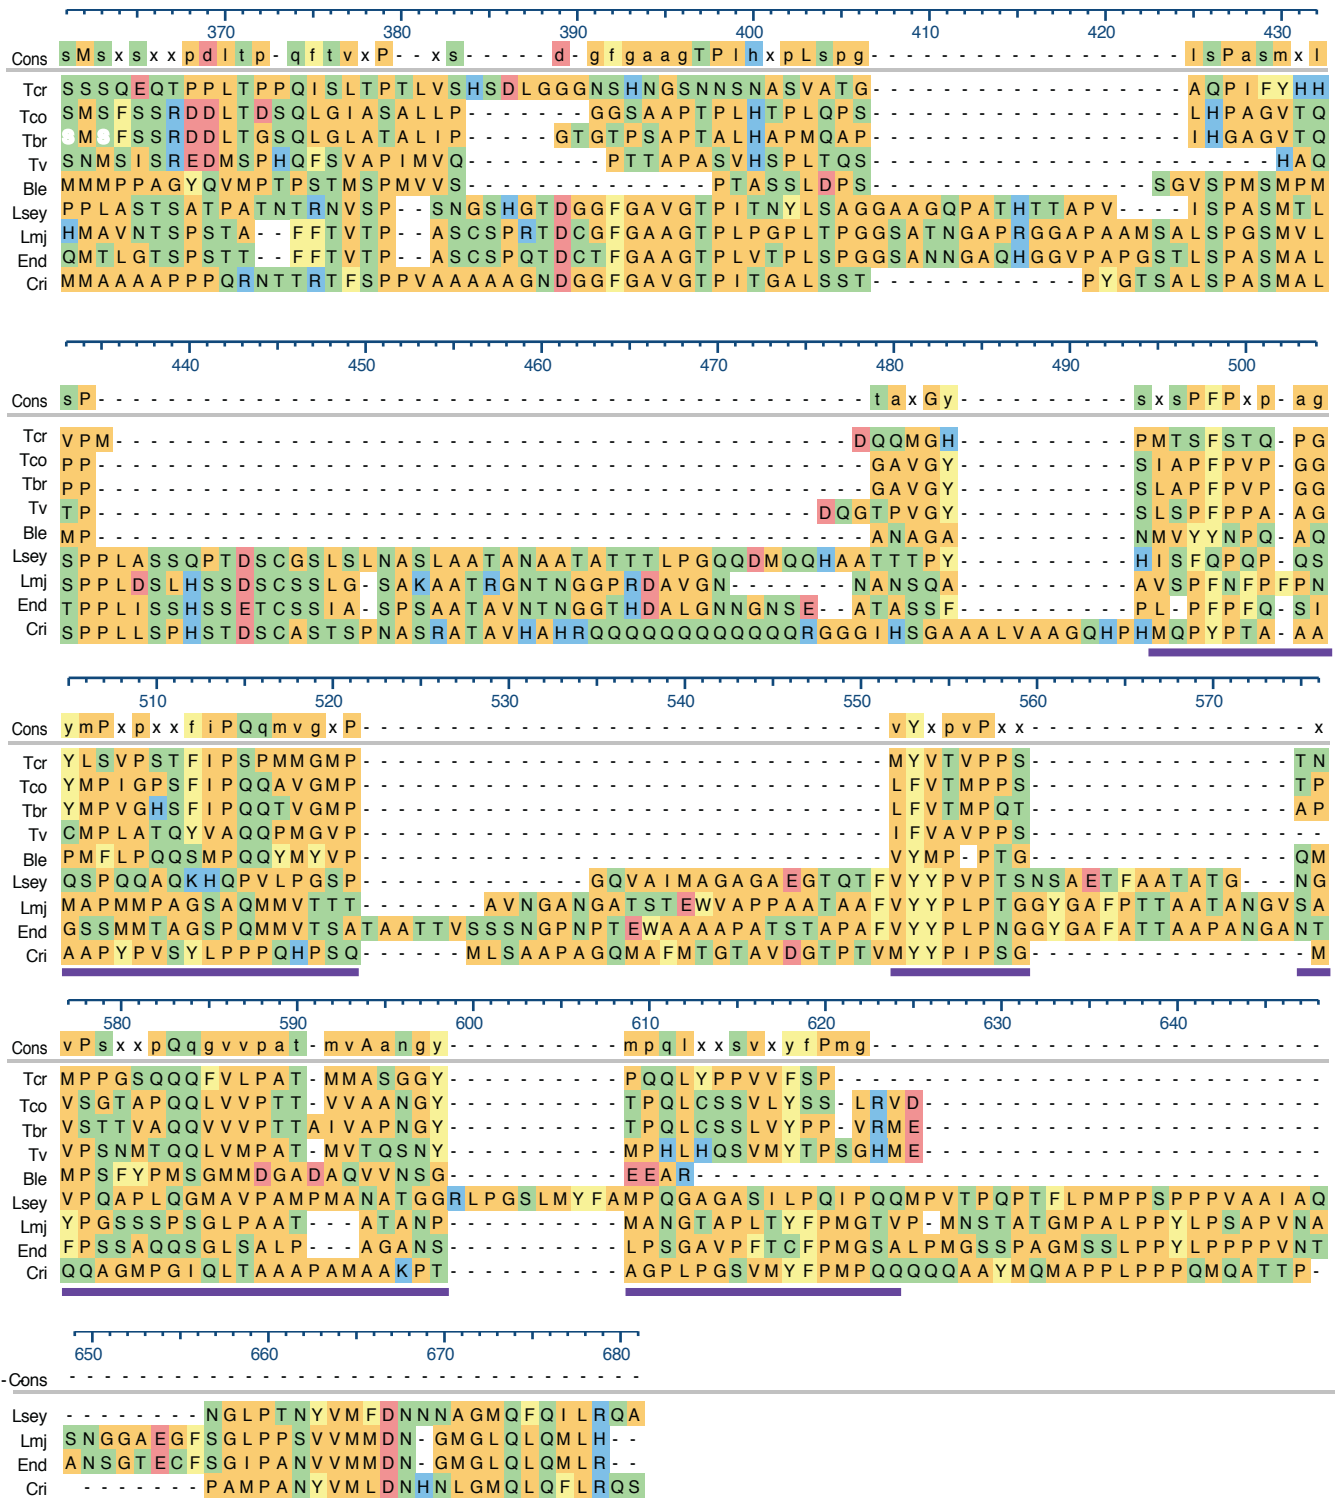

### B. Tree

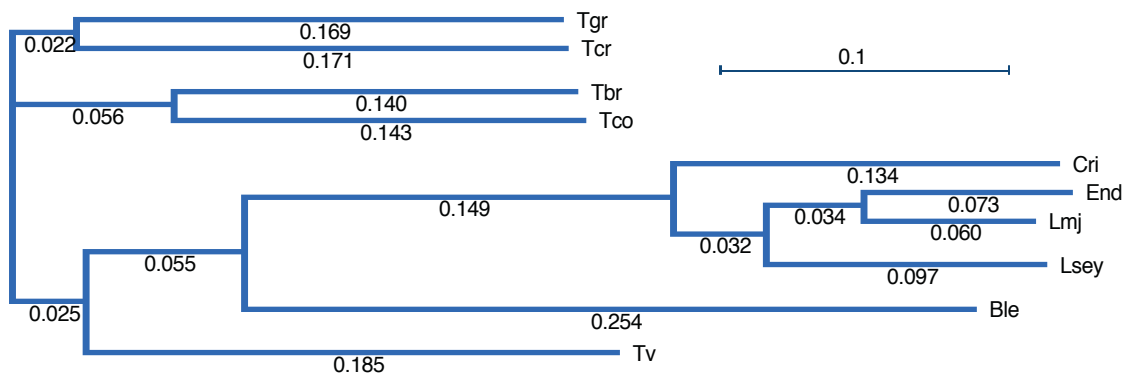

Supplement: ppat.1006560.s006.pdf [file ppat.1006560.s006.pdf]
