# Supplementary material for: Expression of the RNA-binding protein RBP10 promotes the bloodstream-form differentiation state in Trypanosoma brucei
Source: PubMed Central journal article supplement (PMC5568443; doi:10.1371/journal.ppat.1006560), 2017-08-11
Supplement: ppat.1006560.s007.pdf [file ppat.1006560.s007.pdf]

**A**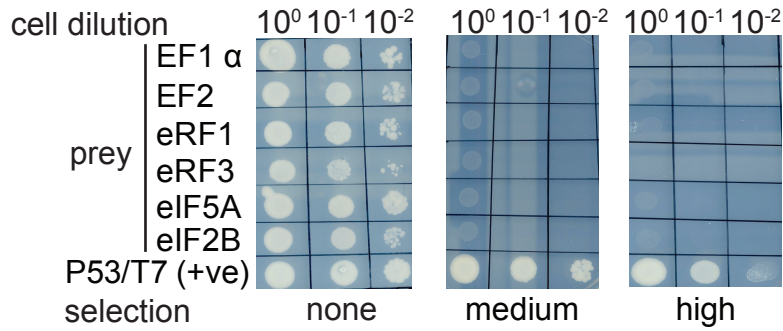**B**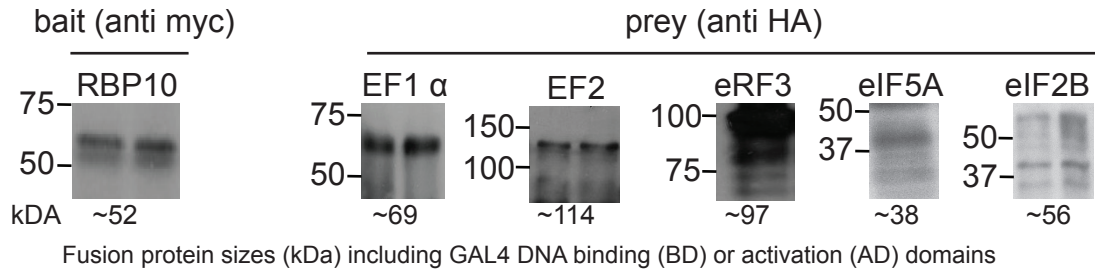**C**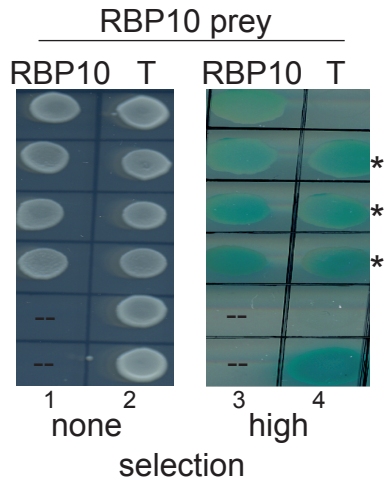**D**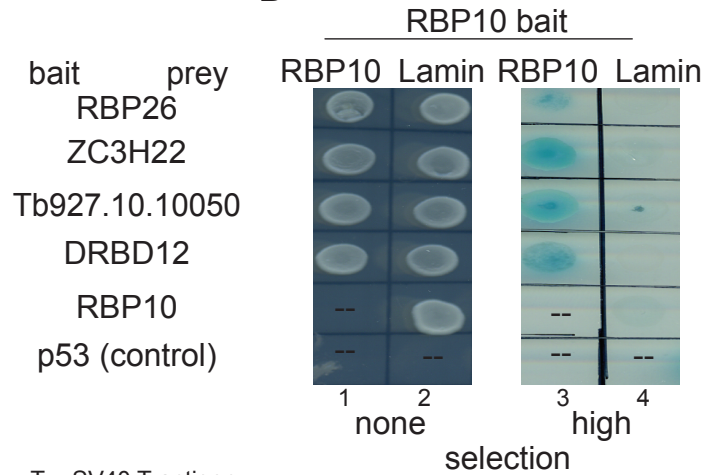**E**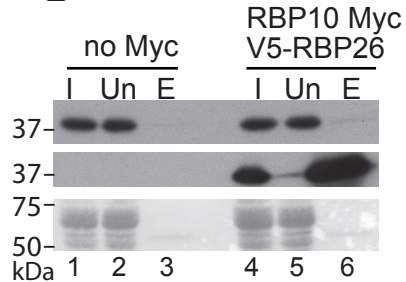**F**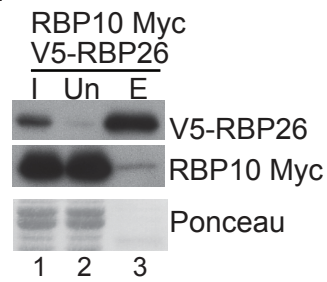

I=input (3%); Un=unbound (3%); E=eluate (50%)
