# Supplementary material for: Expression of the RNA-binding protein RBP10 promotes the bloodstream-form differentiation state in Trypanosoma brucei
Source: PubMed Central journal article supplement (PMC5568443; doi:10.1371/journal.ppat.1006560), 2017-08-11
Supplement: ppat.1006560.s009.pdf [file ppat.1006560.s009.pdf]

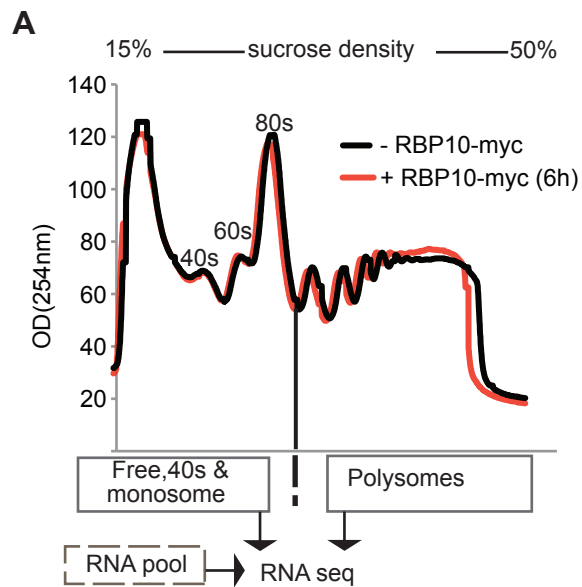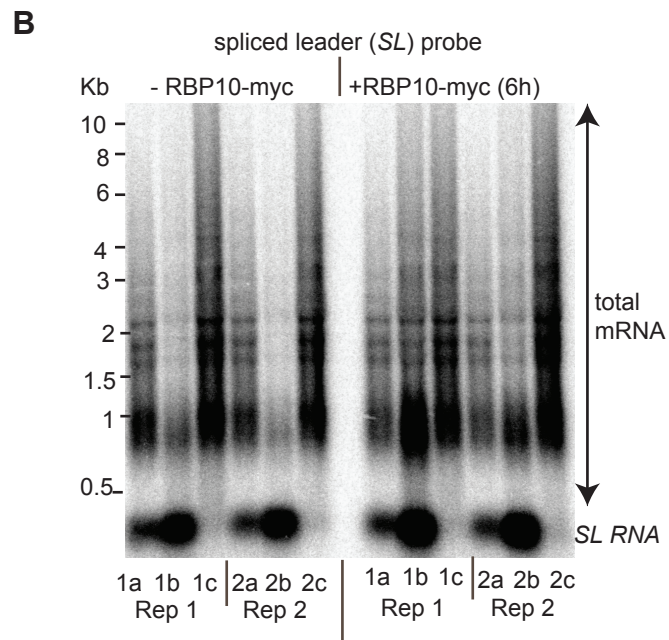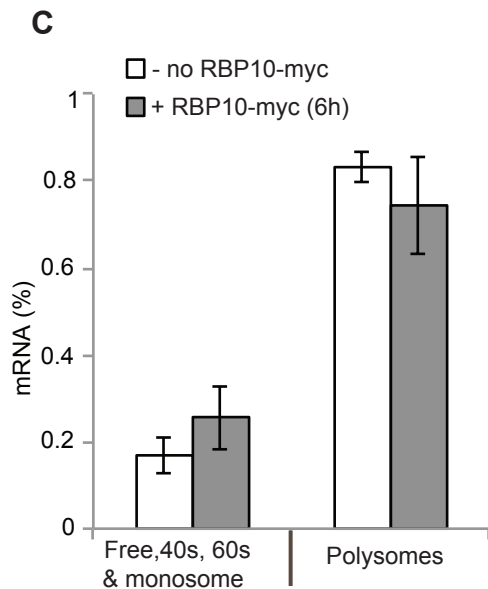

a = input  
b = subunits & monosome  
c = polysomes
