# Supplementary material for: Expression of the RNA-binding protein RBP10 promotes the bloodstream-form differentiation state in Trypanosoma brucei
Source: PubMed Central journal article supplement (PMC5568443; doi:10.1371/journal.ppat.1006560), 2017-08-11

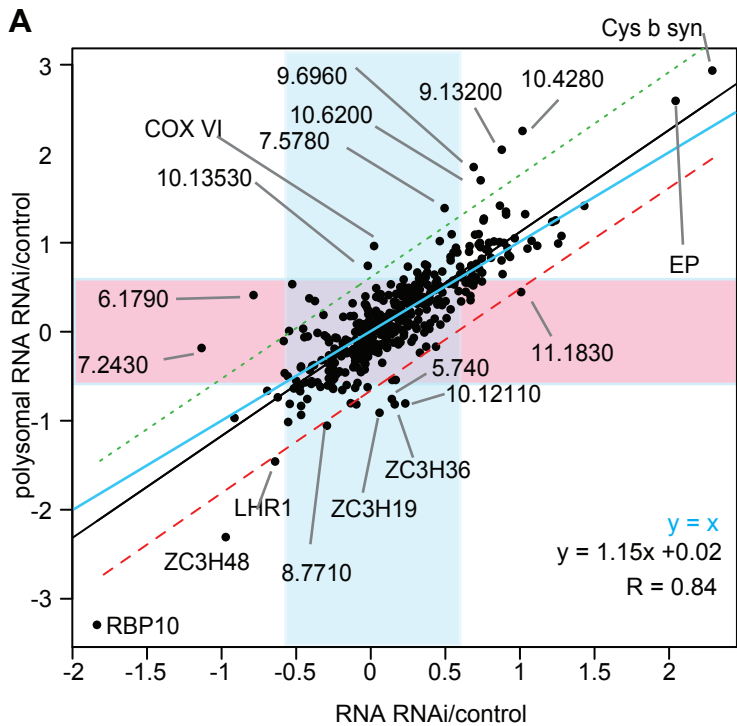

|                |                                        |
|----------------|----------------------------------------|
| Tb927.10.10250 | EP procyclin                           |
| Tb11.02.5400   | cystathionine beta-synthase            |
| Tb927.10.280   | Cytochrome oxidase subunit VI (COXVI)  |
| Tb927.10.4280  | Cytochrome bd ubiquinol oxidase subuni |
| Tb927.10.12760 | ZC3H36                                 |
| Tb927.9.7470   | purine nucleoside transporter NT10     |
| Tb927.3.3310   | 60S ribosomal protein L13              |
| Tb927.10.8430  | 40S ribosomal protein S12              |
| Tb927.9.10280  | ZC3H48                                 |
| Tb927.7.2580   | ZC3H19                                 |
| Tb927.8.6010   | Heme uptake protein LHR1               |

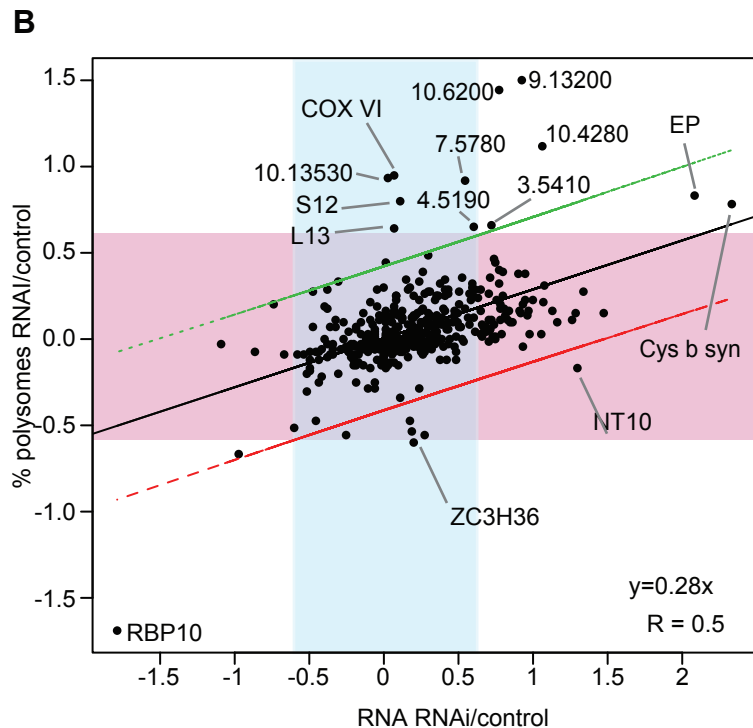

Supplement: ppat.1006560.s010.pdf [file ppat.1006560.s010.pdf]
