# Supplementary material for: Expression of the RNA-binding protein RBP10 promotes the bloodstream-form differentiation state in Trypanosoma brucei
Source: PubMed Central journal article supplement (PMC5568443; doi:10.1371/journal.ppat.1006560), 2017-08-11

**A** Procyclic form

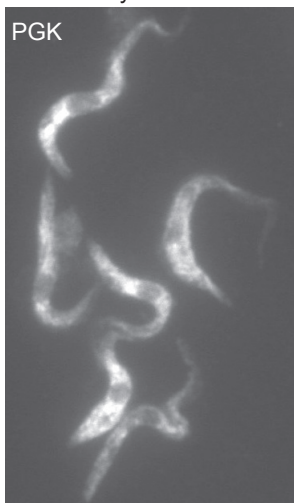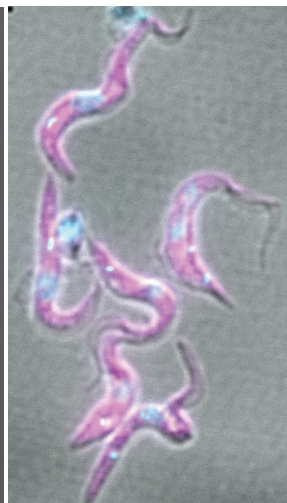

DAPI  
PGK

**B** Bloodstream form 37°C

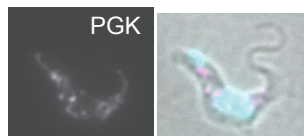

**C** Bloodstream form 17h CA 27°C

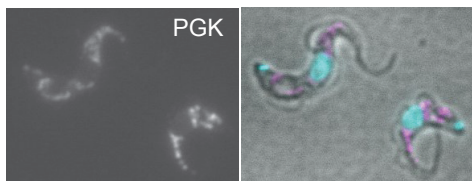

**D** Bloodstream form 17h *rbp10* RNAi 37°C, 3d MEM 27°C

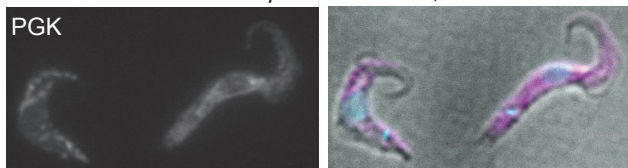

**E** Procyclic form 48h +RBP10, 27°C

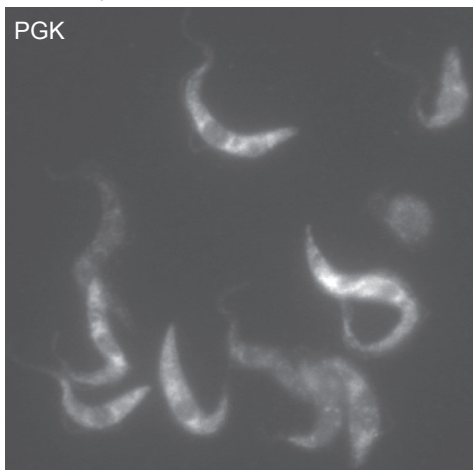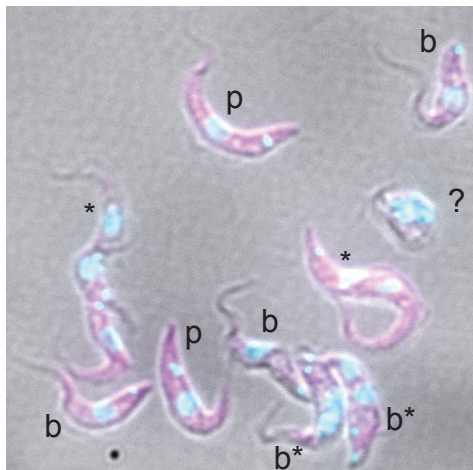

Supplement: ppat.1006560.s011.pdf [file ppat.1006560.s011.pdf]
