# Supplementary material for: Expression of the RNA-binding protein RBP10 promotes the bloodstream-form differentiation state in Trypanosoma brucei
Source: PubMed Central journal article supplement (PMC5568443; doi:10.1371/journal.ppat.1006560), 2017-08-11

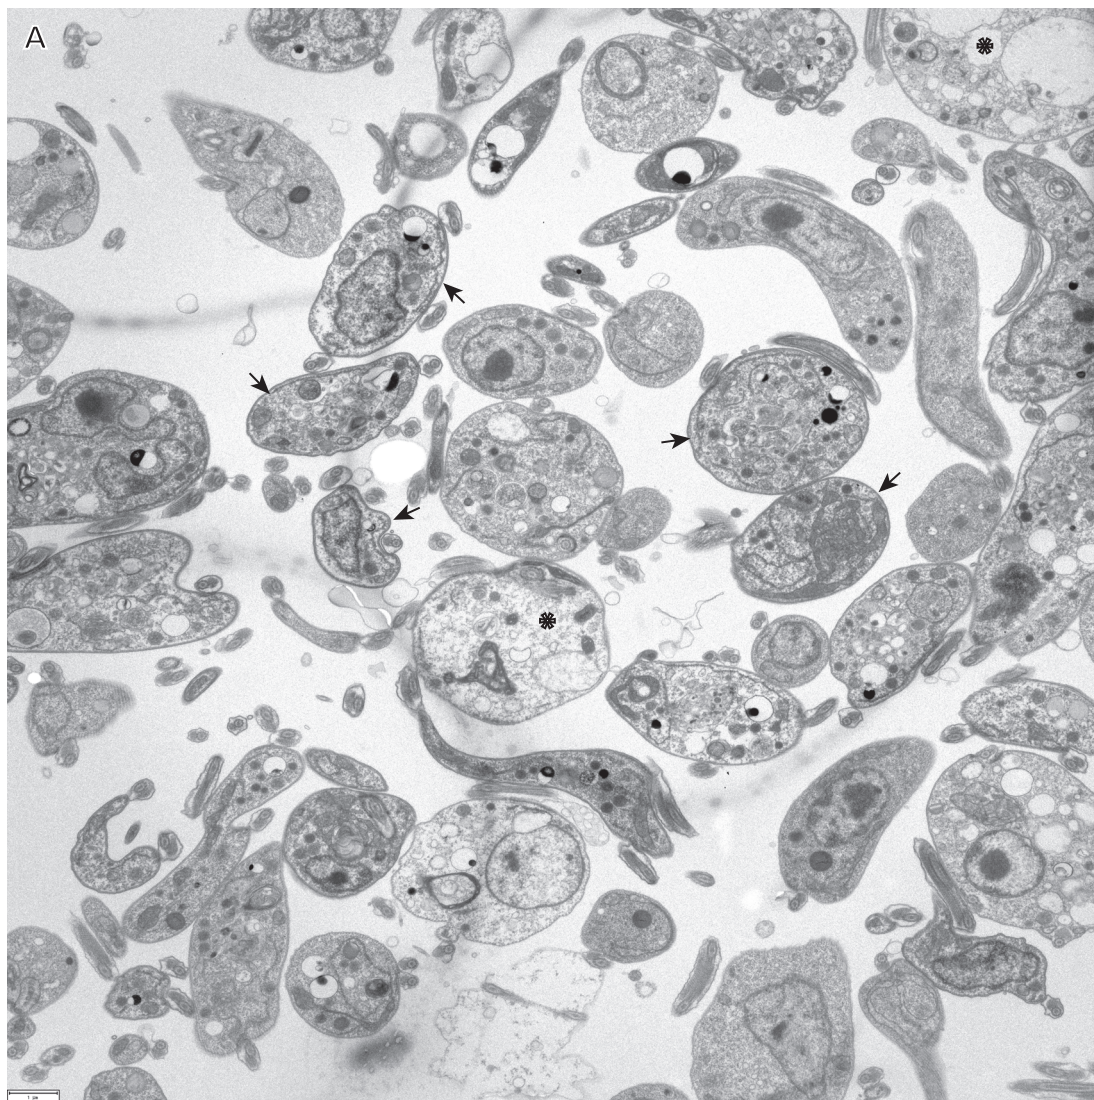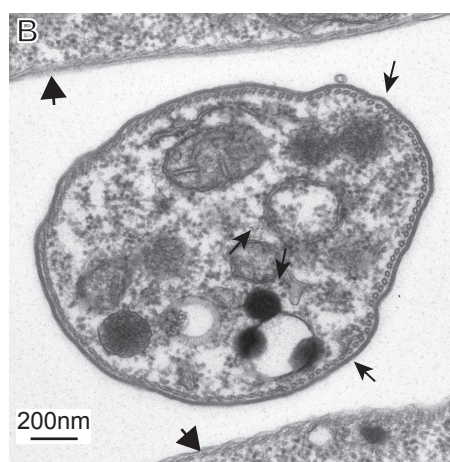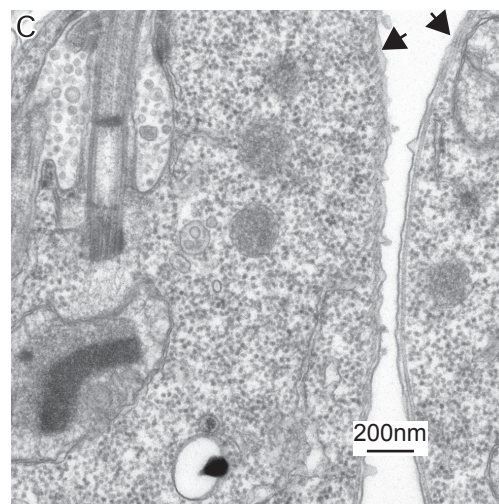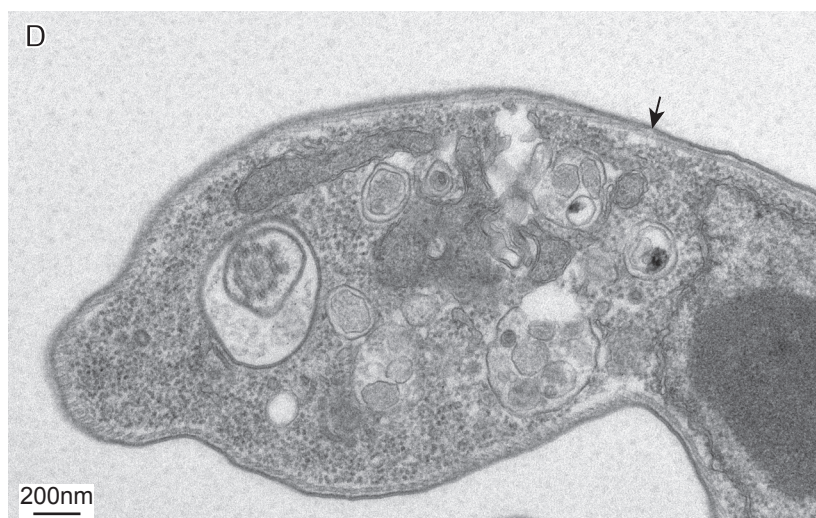

Supplement: ppat.1006560.s013.pdf [file ppat.1006560.s013.pdf]
