# Supplementary material for: Expression of the RNA-binding protein RBP10 promotes the bloodstream-form differentiation state in Trypanosoma brucei
Source: PLoS Pathog. 2017 Aug 11;13(8):e1006560. doi: 10.1371/journal.ppat.1006560 (PMC5568443; doi:10.1371/journal.ppat.1006560)
Supplement: S5 Table — For legend see the top sheet 0. (XLS) [file ppat.1006560.s018.xls]

## Sheet: 0. Legend
VSGs expressed by EATRO1125 and procyclic cells expressing RBP10
Sheet 1: All the contigs (> 0.7 kb) from transcriptomes assembly that had 'TGATATATTTTAAC' motif found in all VSG mRNAs. The nearest VSG CDS found by BLASTn and the % sequence identity is shown; BS=bloodstream, PC=procyclic Sample ID; BSNdiff=newly re-differentiated BS cells, BS_2098=starting EATRO1125 BS cells, PC1 & PC2 = procyclic cells expressing RBP10 for 24h and 48h respectively; PC= unindu…
Sheet 2: Raw read counts for 20 unique VSG CDS identified. Sample ID is as above; The 3 putative metacyclic VSGs based on our EATRO1125 genome assemly are highlighted in green and The 8 VSGs detected after 24 and 48h RBP10 expression are in blue text. KX700731.1 VSG was >90% identical to AnTat1.1 CDS so only KX700731.1 was selected for the total RPM estimation.
Sheet 3: Total mRNA changes after RBP10 expression; Raw read counts and calculated RPMs are shown.

## Sheet: 1. All_RNA_contigs
RNA Contig ID (All)	RNA Contig Length	Nearest VSG Accession No.	VSG_ID (NCBI)	CDS size	CDS % coverage	Sample
NODE_5020	1557	KX701110.1	EATRO 1125.4862	1329	100	BSNdiff
NODE_501	4594	KX699109.1	EATRO 1125.224	1518	83	BSNdiff
NODE_7963	799	KX698657.1	EATRO 1125.72	1521	47	BSNdiff
NODE_135	4788	X01843.1	EATRO AnTat 1.1	1512	95.5	BS_2098
NODE_4140	1662	KX700619.1	EATRO 1125.4040	1620	95	BS_2098
NODE_9095	709	KX699100.1	EATRO 1125.211	1527	40	BS_2098
NODE_3364	1656	AF259553.1	MVSG5	1554	100	PC1_A
NODE_3444	1638	KX699860.1	EATRO 1125.1654	1551	100	PC1_A
NODE_3693	1576	KX701110.1	EATRO 1125.4862	1329	100	PC1_A
NODE_4030	1503	KX699226.1	EATRO 1125.385	1431	99.9	PC1_A
NODE_4082	1493	KX701187.1	EATRO 1125.4959	1266	99.4	PC1_A
NODE_1639	2196	KX700057.1	EATRO 1125.2523	1428	78	PC1_A
NODE_4723	1661	KX699860.1	EATRO 1125.1654	1551	100	PC1_B
NODE_4799	1643	AF259553.1	MVSG5	1554	100	PC1_B
NODE_4943	1604	KX701110.1	EATRO 1125.4862	1329	100	PC1_B
NODE_4994	1592	KX701187.1	EATRO 1125.4959	1266	100	PC1_B
NODE_5426	1488	KX699226.1	EATRO 1125.385	1431	99	PC1_B
NODE_2857	2216	KX700057.1	EATRO 1125.2523	1428	78	PC1_B
NODE_5343	1509	KX699109.1	EATRO 1125.224	1518	75	PC1_B
NODE_5808	1395	KX699224.1	EATRO 1125.383	1434	75	PC1_B
NODE_4566	1624	KX698697.1	EATRO 1125.313	1743	100	PC2_A
NODE_4607	1614	KX698690.1	EATRO 1125.276	1488	100	PC2_A
NODE_4391	1666	KX699100.1	EATRO 1125.211	1527	100	PC2_A
NODE_4928	1537	KX699226.1	EATRO 1125.385	1431	100	PC2_A
NODE_4129	1735	KX699246.1	EATRO 1125.421	1392	100	PC2_A
NODE_5189	1464	KX699312.1	EATRO 1125.514	1350	100	PC2_A
NODE_4379	1670	KX699860.1	EATRO 1125.1654	1266	100	PC2_A
NODE_4471	1645	KX701110.1	EATRO 1125.4862	1329	100	PC2_A
NODE_2790	2132	KX701187.1	EATRO 1125.4959	1266	100	PC2_A
NODE_4070	1749	AF259553.1	MVSG5	1554	99.9	PC2_A
NODE_4442	1653	KX699008.1	EATRO 1125.84	1605	98	PC2_A
NODE_4884	1548	KX699224.1	EATRO 1125.383	1434	92	PC2_A
NODE_4548	1629	KX700731.1	EATRO 1125.4156=Antat1.1	1521	89	PC2_A
NODE_4581	1620	KX700095.1	EATRO 1125.2564	1512	87	PC2_A
NODE_5344	1428	KX700970.1	EATRO 1125.4710	1416	87	PC2_A
NODE_973	2998	KX700057.1	EATRO 1125.2523	1428	78	PC2_A
NODE_1279	1855	AF259553.1	MVSG5	1554	100	PC2_B
NODE_2304	1546	KX701187.1	EATRO 1125.4959	1266	99.8	PC2_B
NODE_2262	1559	KX698697.1	EATRO 1125.313	1473	99	PC2_B
NODE_497	2308	KX700057.1	EATRO 1125.2523	1428	78	PC2_B
NODE_2005	1618	KX699100.1	EATRO 1125.211	1527	100	PC2_B
NODE_2372	1532	KX699226.1	EATRO 1125.385	1431	100	PC2_B
NODE_1911	1645	KX699246.1	EATRO 1125.421	1392	100	PC2_B
NODE_1862	1657	KX699860.1	EATRO 1125.1654	1551	100	PC2_B
NODE_1923	1642	KX701110.1	EATRO 1125.4862	1329	100	PC2_B
NODE_2064	1603	KX700731.1	EATRO 1125.4156	1521	87	PC2_B
NODE_2216	1568	KX700095.1	EATRO 1125.2564	1512	83	PC2_B

## Sheet: Raw data_unique contigs (20)
RNA Contig_ID (longest)	RNA Contig Length (max)	RNA Contig Length (min)	Nearest VSG Accession No.	Gene ID (NCBI)	CDS_size (NCBI)	CDS % identity	BSNDiff	BS_2098	PC1_A	PC1_B	PC2_A	PC2_B	PC_A	PC_B	Metacyclic promoter?	ESAG1?	72bp repeats?	Shotgun DNA Contigs (length)
NODE_135	4788		X01843.1	AnTat1.1	1512	96	32	1267690	9	6	625	238	3	31	no			na
NODE_4548	1629	1603	KX700731.1	EATRO 1125.4156=Antat1.1	1521	89	38	1530446	2	5	737	280	4	46	na	na	na	na
NODE_4391	1666	1618	KX699100.1	EATRO 1125.211	1527	100	333	559434	51	79	3898	1270	5	25	na	na	na	na
NODE_4471	1645	1557	KX701110.1	EATRO 1125.4862	1329	100	763	536	33780	126840	2011130	965390	266	125	yes	yes	no	16882
NODE_2790	2132	1493	KX701187.1	EATRO 1125.4959	1266	100	84	56	2200	7146	183965	105932	54	11	na	na	na	na
NODE_4379	1670	1638	KX699860.1	EATRO 1125.1654	1551	100	52	22	3389	11911	89263	38447	136	34	na	na	na	na
NODE_4928	1537	1488	KX699226.1	EATRO 1125.385	1431	100	9	6	1042	3469	45387	17981	52	25	yes	not clear; short DNA contig	no	4091
NODE_1279	1855	1643	AF259553.1	MVSG5	1554	100	9	6	709	2324	45237	31741	53	10	yes	yes	no	7342
NODE_4566	1624	1559	KX698697.1	EATRO 1125.313	1473	100	145	83	99	132	13327	2820	3	1	na	na	na	na
NODE_4129	1735	1645	KX699246.1	EATRO 1125.421	1392	100	164	116	88	134	12814	2763	3	2	na	na	na	na
NODE_973	2998	2196	KX700057.1	EATRO 1125.2523	1428	78	1	4	211	916	10622	5951	5	3	na	na	na	na
NODE_4581	1620	1568	KX700095.1	EATRO 1125.2564	1512	87	51	10	19	54	3149	1029	2	0	na	na	na	na
NODE_4442	1653		KX699008.1	EATRO 1125.84	1605	98	144	14	14	22	1433	402	0	0	na	na	na	na
NODE_4884	1548	1395	KX699224.1	EATRO 1125.383	1434	92	24	27	330	1016	792	300	192	116	na	na	na	na
NODE_5189	1464		KX699312.1	EATRO 1125.514	1350	100	231	193	33	100	714	250	3	1	na	na	na	na
NODE_5344	1428		KX700970.1	EATRO 1125.4710	1416	87	50	21	3	4	502	75	2	0	na	na	na	na
NODE_4607	1614		KX698690.1	EATRO 1125.276	1488	100	107	55	14	9	435	20	2	0	na	na	na	na
NODE_4140	1662		KX700619.1	EATRO 1125.4040	1620	95	37	523	3	4	116	46	3	0	na	na	na	na
NODE_501	4594	1509	KX699109.1	EATRO 1125.224	1518	83	653170	32	2	517	60	19	1	1	na	na	na	na
NODE_7963	799		KX698657.1	EATRO 1125.72	1521	47	189	17	0	1	1	2	0	0	na	na	na	na
na	na	na	AJ012198.3	ILTat1.22	1440	na	0	0	0	0	0	0	0	0
na	na	na	AJ486954.2	ILTat1.63_partial	893	na	0	0	0	0	0	0	0	0
na	na	na	U83435.1	MVAT7	1413	na	0	0	0	0	0	0	0	0
na	na	na	AF068693.1	MVAT4	1440	na	0	0	0	0	0	0	0	0
na	na	na	AJ012199.2	ILTat1.61	1557	na	0	0	0	0	0	0	0	0
na	na	na	AJ486955.1	ILTat1.64_partial	536	na	0	0	0	0	0	0	0	0
						Total without Antat1.1	655601	2091601	41989	154683	2423582	1174718	786	400
						RPM	19565	75401	1582	1943	42683	51171	21	14
						%VSG	1.957	7.54	0.158	0.194	4.268	5.117	0.002	0.001
				fraction of original BS types			0.00057	0.99918	0.00126	0.00054	0.00191	0.00132	0.01145	0.1775		EATRO1125.4156+EATRO 1125.211 )
				fraction of metacyclic types			0.00119	0.00026	0.8462	0.85745	0.86721	0.86413	0.47201	0.4		EATRO 1125.4862+EATRO 1125.385+MVSG5

## Sheet: RPM unique
2013Latest_numbers	Annotation	Class	BSNDiff	BS_2098	PC_A	PC_B	PC1_A	PC1_B	PC2_A	PC-2B	BSNDiff	BS_2098	PC_A	PC_B	PC1_A	PC1_B	PC2_A	PC-2B			BFNDiff	BFO2098	PC24B	PC24C	PC48B	PC48C	PCUniB	PCUniC
Antat VSGs	VSG total	VSG	655601	2091601	786	400	41989	154683	2423582	1174718	19565	75401	21	14	1582	1943	42683	51171		Total no Antat1.1	655601	2091601	41989	154683	2423582	1174718	786	400
Tb927.1.5220	ESAG9, putative	ESAG	0	0	0	0	0	0	0	0	0	0	0	0	0	0	0	0
Tb927.10.8340	hypothetical protein	ZUnknown	0	8	7	5	6	25	30	17	0	0	0	0	0	0	1	1
Tb927.4.3200	hypothetical protein, conserved	ZUnknown	0	0	0	0	0	0	0	0	0	0	0	0	0	0	0	0
Tb927.4.3220	hypothetical protein, conserved	ZUnknown	0	0	0	0	1	1	1	0	0	0	0	0	0	0	0	0
Tb927.4.3240	hypothetical protein, conserved	ZUnknown	0	0	0	0	0	0	0	0	0	0	0	0	0	0	0	0
Tb927.4.3260	hypothetical protein, conserved	ZUnknown	0	0	0	0	0	0	0	0	0	0	0	0	0	0	0	0
Tb927.5.120	ESAG9, putative	ESAG	0	0	0	0	2	0	1	0	0	0	0	0	0	0	0	0
Tb927.7.170	ESAG9, putative	ESAG	0	0	0	0	0	0	0	0	0	0	0	0	0	0	0	0
Tb927.9.1120	hypothetical protein, conserved	ZUnknown	0	0	0	0	1	0	0	0	0	0	0	0	0	0	0	0
Tb927.9.14600	iron/ascorbate oxidoreductase family protein, putative	Mito.pathway	0	0	0	0	0	0	0	0	0	0	0	0	0	0	0	0
Tb927.9.15720	hypothetical protein, conserved	ZUnknown	0	0	0	0	0	0	0	0	0	0	0	0	0	0	0	0
Tb927.9.16190	UDP-Gal or UDP-GlcNAc-dependent glycosyltransferase, putative	Glycans	0	0	1	0	0	0	1	0	0	0	0	0	0	0	0	0
Tb927.9.16410	hypothetical protein	ZUnknown	0	0	0	0	0	0	1	0	0	0	0	0	0	0	0	0
Tb927.9.16950	hypothetical protein	ZUnknown	0	0	0	0	0	1	1	0	0	0	0	0	0	0	0	0
Tb927.9.17670	hypothetical protein, conserved	ZUnknown	0	0	0	0	0	1	4	0	0	0	0	0	0	0	0	0
Tb927.9.17730	hypothetical protein	ZUnknown	0	2	1	0	5	10	9	0	0	0	0	0	0	0	0	0
Tb927.9.7420	ESAG9, putative	ESAG	0	0	0	0	0	0	0	0	0	0	0	0	0	0	0	0
Tb927.9.800	UDP-Gal or UDP-GlcNAc-dependent glycosyltransferase, putative	Glycans	0	2	1	0	1	9	5	5	0	0	0	0	0	0	0	0
Tb927.9.910	Trypanosome variant surface glycoprotein (A-type), putative	ZUnknown	0	0	0	0	0	0	1	0	0	0	0	0	0	0	0	0
Tb927.9.920	hypothetical protein	ZUnknown	0	1	0	0	0	2	2	1	0	0	0	0	0	0	0	0
Tb927.1.30	hypothetical protein	ZUnknown	1	1	0	1	3	4	4	5	0	0	0	0	0	0	0	0
Tb927.3.5700	hypothetical protein, conserved	ZUnknown	1	1	1	1	0	1	2	3	0	0	0	0	0	0	0	0
Tb927.3.5720	hypothetical protein, conserved	ZUnknown	1	1	1	1	0	1	2	3	0	0	0	0	0	0	0	0
Tb927.4.5790	UDP-Gal or UDP-GlcNAc-dependent glycosyltransferase, putative	Glycans	1	2	0	0	1	2	7	2	0	0	0	0	0	0	0	0
Tb927.9.17760	hypothetical protein	ZUnknown	1	0	0	0	1	2	7	1	0	0	0	0	0	0	0	0
Tb927.9.7960	hypothetical protein	ZUnknown	2	0	7	2	2	11	15	1	0	0	0	0	0	0	0	0
Tb927.1.40	hypothetical protein	ZUnknown	3	4	2	0	26	38	152	62	0	0	0	0	1	0	3	3
Tb927.11.11420	hypothetical protein	ZUnknown	4	4	22	6	22	47	46	9	0	0	1	0	1	1	1	0
Tb927.4.2090	hypothetical protein	ZUnknown	4	13	7	11	21	48	64	24	0	0	0	0	1	1	1	1
Tb927.4.5440	hypothetical protein	ZUnknown	4	5	3	2	11	17	6	1	0	0	0	0	0	0	0	0
Tb927.9.17940	hypothetical protein	ZUnknown	5	9	14	5	18	52	42	23	0	0	0	0	1	1	1	1
Tb927.10.6430	hypothetical protein	ZUnknown	6	58	33	50	55	268	119	114	0	2	1	2	2	3	2	5
Tb927.10.1010	hypothetical protein	ZUnknown	7	8	24	20	27	49	19	6	0	0	1	1	1	1	0	0
Tb05.30F7.410	hypothetical protein	ZUnknown	8	9	17	7	23	54	33	14	0	0	0	0	1	1	1	1
Tb927.10.14060	hypothetical protein	ZUnknown	8	4	12	7	13	24	17	4	0	0	0	0	0	0	0	0
Tb927.10.7650	hypothetical protein	ZUnknown	9	8	15	4	11	21	35	15	0	0	0	0	0	0	1	1
Tb927.10.7150	hypothetical protein	ZUnknown	11	7	30	17	28	82	50	24	0	0	1	1	1	1	1	1
Tb927.10.9530	hypothetical protein	ZUnknown	11	2	5	3	13	22	16	8	0	0	0	0	0	0	0	0
Tb927.2.5710	hypothetical protein	ZUnknown	11	4	148	66	141	449	173	127	0	0	4	2	5	6	3	6
Tb927.11.13160	hypothetical protein	ZUnknown	12	9	36	15	52	177	94	37	0	0	1	1	2	2	2	2
Tb927.4.1210	hypothetical protein	ZUnknown	12	20	32	19	40	77	24	4	0	1	1	1	2	1	0	0
Tb927.3.5770	hypothetical protein	ZUnknown	13	19	15	12	12	61	40	27	0	1	0	0	0	1	1	1
Tb927.7.3480	hypothetical protein	ZUnknown	15	4	62	36	85	212	76	30	0	0	2	1	3	3	1	1
Tb927.5.4000	hypothetical protein	ZUnknown	17	21	30	17	41	109	60	22	1	1	1	1	2	1	1	1
Tb927.10.1020	hypothetical protein	ZUnknown	18	21	59	47	89	173	96	24	1	1	2	2	3	2	2	1
Tb927.10.13060	hypothetical protein	ZUnknown	20	16	51	26	56	152	54	22	1	1	1	1	2	2	1	1
Tb927.9.16070	hypothetical protein	ZUnknown	22	10	6	3	14	50	28	15	1	0	0	0	1	1	0	1
Tb927.9.16060	hypothetical protein	ZUnknown	26	33	26	11	47	113	66	11	1	1	1	0	2	1	1	0
Tb927.10.3050	hypothetical protein	ZUnknown	29	26	56	38	66	141	68	23	1	1	1	1	2	2	1	1
Tb927.10.8350	hypothetical protein	ZUnknown	29	34	30	23	32	106	78	49	1	1	1	1	1	1	1	2
Tb927.10.7170	hypothetical protein	ZUnknown	30	23	106	65	122	262	119	46	1	1	3	2	5	3	2	2
Tb927.10.9550	hypothetical protein	ZUnknown	33	45	94	61	190	549	446	184	1	2	2	2	7	7	8	8
Tb927.4.3290	ESAG2-like	ESAG	34	28	21	10	13	37	36	7	1	1	1	0	0	0	1	0
Tb927.8.5930	hypothetical protein	ZUnknown	34	59	82	70	100	212	95	48	1	2	2	2	4	3	2	2
Tb927.9.13160	hypothetical protein	ZUnknown	34	26	96	67	105	321	118	72	1	1	3	2	4	4	2	3
Tb927.2.5720	hypothetical protein, predicted by Mitocarta	ZUnknown	35	61	45	27	66	175	130	39	1	2	1	1	2	2	2	2
Tb927.6.1300	hypothetical protein	ZUnknown	37	57	77	50	99	305	149	80	1	2	2	2	4	4	3	3
Tb927.10.4350	hypothetical protein	ZUnknown	38	33	33	20	40	94	60	17	1	1	1	1	2	1	1	1
Tb927.10.7660	hypothetical protein	ZUnknown	38	67	146	99	109	291	164	77	1	2	4	3	4	4	3	3
Tb927.10.12560	hypothetical protein	ZUnknown	40	12	46	31	127	413	176	54	1	0	1	1	5	5	3	2
Tb927.4.3280	ESAG2, putative	ESAG	41	39	10	1	8	20	40	8	1	1	0	0	0	0	1	0
Tb927.7.1940	hypothetical protein, T brucei-specific	ZUnknown	43	14	10	11	28	69	38	20	1	1	0	0	1	1	1	1
Tb927.1.3350	hypothetical protein	ZUnknown	44	28	61	26	99	213	140	36	1	1	2	1	4	3	2	2
Tb927.10.3410	hypothetical protein	ZUnknown	46	36	25	18	21	37	44	9	1	1	1	1	1	0	1	0
Tb927.10.12280	hypothetical protein	ZUnknown	47	20	86	59	168	580	234	153	1	1	2	2	6	7	4	7
Tb927.11.16180	hypothetical protein	ZUnknown	49	49	9	7	33	86	57	18	1	2	0	0	1	1	1	1
Tb927.1.10	hypothetical protein	ZUnknown	50	32	19	11	27	46	43	29	1	1	1	0	1	1	1	1
Tb927.11.13720	hypothetical protein	ZUnknown	53	41	20	19	31	81	59	20	2	1	1	1	1	1	1	1
Tb927.6.810	hypothetical protein	ZUnknown	53	50	53	26	59	151	92	40	2	2	1	1	2	2	2	2
Tb927.10.12570	hypothetical protein	ZUnknown	54	32	131	88	360	946	333	163	2	1	3	3	14	12	6	7
Tb927.7.6020	hypothetical protein	ZUnknown	54	9	71	44	154	423	201	79	2	0	2	2	6	5	4	3
Tb927.11.8840	hypothetical protein	ZUnknown	55	41	81	98	128	386	158	66	2	1	2	3	5	5	3	3
Tb927.10.12580	hypothetical protein	ZUnknown	58	22	142	55	171	458	238	138	2	1	4	2	6	6	4	6
Tb927.10.9610	hypothetical protein	ZUnknown	64	46	37	25	30	59	79	10	2	2	1	1	1	1	1	0
Tb927.9.15950	hypothetical protein	ZUnknown	64	36	37	30	62	131	66	13	2	1	1	1	2	2	1	1
Tb927.10.4360	hypothetical protein	ZUnknown	67	38	51	46	34	122	80	31	2	1	1	2	1	2	1	1
Tb927.8.5340	hypothetical protein	ZUnknown	69	48	236	161	136	364	156	53	2	2	6	6	5	5	3	2
Tb927.9.7910	hypothetical protein, conserved	ZUnknown	73	77	24	24	64	216	180	49	2	3	1	1	2	3	3	2
Tb927.1.5250	hypothetical protein	ZUnknown	74	57	9	3	61	154	232	104	2	2	0	0	2	2	4	5
Tb927.9.140	hypothetical protein	ZUnknown	76	63	1	2	7	33	70	30	2	2	0	0	0	0	1	1
Tb927.11.16190	hypothetical protein	ZUnknown	77	45	86	70	130	444	229	113	2	2	2	2	5	6	4	5
Tb927.9.7860	hypothetical protein, conserved	ZUnknown	81	71	22	30	61	222	188	56	2	3	1	1	2	3	3	2
Tb927.9.7880	hypothetical protein, conserved	ZUnknown	81	71	32	33	67	232	207	56	2	3	1	1	3	3	4	2
Tb927.10.9620	NADH-ubiquinone oxidoreductase c	Mito.e.transport	89	65	83	51	92	207	194	109	3	2	2	2	3	3	3	5
Tb927.10.11280	hypothetical protein, T brucei brucei only	ZUnknown	90	119	205	138	221	606	508	340	3	4	5	5	8	8	9	15
Tb927.9.3810	hypothetical protein	ZUnknown	90	62	85	45	64	147	119	63	3	2	2	2	2	2	2	3
Tb927.10.9630	hypothetical protein	ZUnknown	94	73	82	56	110	246	180	144	3	3	2	2	4	3	3	6
Tb927.10.16010	hypothetical protein	ZUnknown	96	82	165	139	379	939	500	239	3	3	4	5	14	12	9	10
Tb927.10.1670	hypothetical protein	ZUnknown	96	77	108	93	111	402	261	239	3	3	3	3	4	5	5	10
Tb927.10.5720	hypothetical protein	ZUnknown	98	44	24	19	32	88	60	34	3	2	1	1	1	1	1	1
Tb927.11.11990	hypothetical protein	ZUnknown	98	61	129	78	151	337	162	39	3	2	3	3	6	4	3	2
Tb927.9.7870	hypothetical protein, conserved, predicted GPI anchor	Membrane.protein	99	109	50	29	121	389	468	148	3	4	1	1	5	5	8	6
Tb927.10.15070	hypothetical protein, conserved	ZUnknown	101	86	132	72	109	294	240	151	3	3	3	3	4	4	4	7
Tb927.9.7850	hypothetical protein, conserved, predicted GPI anchor	Membrane.protein	103	115	53	30	127	416	487	153	3	4	1	1	5	5	9	7
Tb927.9.7950	hypothetical protein, conserved, predicted GPI anchor	Membrane.protein	103	114	55	30	127	410	484	152	3	4	1	1	5	5	9	7
Tb927.9.7900	hypothetical protein, conserved, predicted GPI anchor	Membrane.protein	104	114	55	31	127	412	485	153	3	4	1	1	5	5	9	7
Tb927.1.4020	hypothetical protein	ZUnknown	118	54	56	28	65	127	107	69	4	2	1	1	2	2	2	3
Tb927.11.17900	Trypanosomal VSG domain containing protein, putative	ZUnknown	120	100	26	8	103	279	390	175	4	4	1	0	4	4	7	8
Tb927.5.1480	hypothetical protein	ZUnknown	125	55	48	22	46	79	62	50	4	2	1	1	2	1	1	2
Tb927.11.16780	hypothetical protein	ZUnknown	127	76	64	31	55	94	159	52	4	3	2	1	2	1	3	2
Tb927.11.7990	hypothetical protein	ZUnknown	127	128	96	75	65	216	138	43	4	5	3	3	2	3	2	2
Tb927.10.13460	hypothetical protein	ZUnknown	128	50	32	23	19	54	35	11	4	2	1	1	1	1	1	0
Tb927.10.4190	hypothetical protein	ZUnknown	130	98	76	58	55	177	133	67	4	4	2	2	2	2	2	3
Tb927.11.7810	hypothetical protein	ZUnknown	130	105	122	68	122	228	275	77	4	4	3	2	5	3	5	3
Tb927.7.6010	hypothetical protein	ZUnknown	131	67	243	187	323	831	345	97	4	2	6	7	12	10	6	4
Tb927.10.4960	hypothetical protein	ZUnknown	139	147	153	103	124	318	246	101	4	5	4	4	5	4	4	4
Tb927.10.10270	hypothetical protein	ZUnknown	145	144	234	183	269	744	371	137	4	5	6	6	10	9	7	6
Tb927.11.530	RBP3	RNA.binding	147	151	129	66	102	290	467	179	4	5	3	2	4	4	8	8
Tb927.3.4010	hypothetical protein	ZUnknown	148	29	83	68	92	263	135	61	4	1	2	2	3	3	2	3
Tb927.11.12000	hypothetical protein, conserved	ZUnknown	154	137	174	136	221	551	381	125	5	5	5	5	8	7	7	5
Tb927.11.17910	hypothetical protein	ZUnknown	156	108	38	21	126	328	423	210	5	4	1	1	5	4	7	9
Tb927.1.5260	hypothetical protein	ZUnknown	157	116	37	19	126	323	434	216	5	4	1	1	5	4	8	9
Tb927.1.4970	hypothetical protein	ZUnknown	165	142	226	170	148	453	397	171	5	5	6	6	6	6	7	7
Tb927.11.2870	hypothetical protein	ZUnknown	166	69	119	78	111	270	196	129	5	2	3	3	4	3	3	6
Tb927.10.12650	hypothetical protein, salivarian tryp only, 3'-UTR of 12660?	ZUnknown	167	68	48	20	32	56	56	17	5	2	1	1	1	1	1	1
Tb927.11.3210	hypothetical protein	ZUnknown	176	111	166	134	149	411	303	159	5	4	4	5	6	5	5	7
Tb927.10.1760	hypothetical protein	ZUnknown	177	48	549	437	641	2225	1026	621	5	2	15	15	24	28	18	27
Tb927.11.9380	hypothetical protein	ZUnknown	182	87	349	322	376	903	441	139	5	3	9	11	14	11	8	6
Tb927.9.4130	hypothetical protein, conserved	ZUnknown	184	65	53	20	68	105	125	64	5	2	1	1	3	1	2	3
Tb927.10.2450	hypothetical protein	ZUnknown	186	159	87	65	109	279	299	96	6	6	2	2	4	4	5	4
Tb927.11.12010	hypothetical protein	ZUnknown	191	168	280	169	245	644	492	229	6	6	7	6	9	8	9	10
Tb927.11.7000	hypothetical protein, conserved	ZUnknown	195	98	54	29	61	107	114	31	6	4	1	1	2	1	2	1
Tb927.11.820	hypothetical protein	ZUnknown	197	111	119	77	100	188	144	81	6	4	3	3	4	2	3	4
Tb927.10.14050	hypothetical protein	ZUnknown	200	206	198	180	203	587	429	261	6	7	5	6	8	7	8	11
Tb927.11.8340	hypothetical protein	ZUnknown	202	128	192	135	172	480	339	241	6	5	5	5	6	6	6	10
Tb927.6.2530	hypothetical protein	ZUnknown	204	145	80	35	82	164	190	77	6	5	2	1	3	2	3	3
Tb927.7.2090	hypothetical protein, conserved, no clear yeast or human matches	ZUnknown	217	152	252	119	263	604	584	214	6	5	7	4	10	8	10	9
Tb927.1.1760	hypothetical transmembrane protein	ZUnknown	218	200	251	159	245	547	415	172	7	7	7	6	9	7	7	7
Tb927.7.6330	hypothetical protein	ZUnknown	218	128	172	91	255	570	478	305	7	5	5	3	10	7	8	13
Tb927.8.490	hypothetical protein	ZUnknown	218	207	4371	3995	5903	26912	8578	2660	7	7	116	141	222	338	151	116
Tb927.8.4300	hypothetical protein	ZUnknown	225	127	163	52	127	299	257	145	7	5	4	2	5	4	5	6
Tb927.9.14510	hypothetical protein	ZUnknown	225	111	286	133	370	947	898	631	7	4	8	5	14	12	16	27
Tb927.11.4440	hypothetical protein	ZUnknown	229	168	95	67	66	155	160	54	7	6	3	2	2	2	3	2
Tb927.11.6880	hypothetical protein	ZUnknown	231	160	194	142	194	470	325	121	7	6	5	5	7	6	6	5
Tb927.10.10220	procyclin-associated gene 2 (PAG2) protein (PAG2)	PAG	242	72	2150	1395	2784	6661	2925	825	7	3	57	49	105	84	52	36
Tb927.10.4410	hypothetical protein	ZUnknown	243	94	104	62	69	161	116	67	7	3	3	2	3	2	2	3
Tb927.10.9600	protein kinase, putative,tyrosine protein kinase, putative	Protein.kinase	252	179	139	89	106	226	351	76	8	6	4	3	4	3	6	3
Tb927.9.15350	hypothetical protein, conserved	ZUnknown	252	133	165	173	142	385	243	36	8	5	4	6	5	5	4	2
Tb927.9.3180	hypothetical protein	ZUnknown	253	174	156	131	173	416	345	184	8	6	4	5	7	5	6	8
Tb927.11.1920	hypothetical protein	ZUnknown	254	296	304	218	317	915	736	241	8	11	8	8	12	11	13	10
Tb927.10.4370	ESAG3, putative	ESAG	257	159	216	140	189	455	323	125	8	6	6	5	7	6	6	5
Tb927.8.6650	DRBD13	RNA.binding	258	132	152	89	76	114	103	23	8	5	4	3	3	1	2	1
Tb927.3.700	hypothetical protein, conserved, no clear yeast or human matches	ZUnknown	261	243	6317	4594	1931	6218	4115	2395	8	9	167	162	73	78	72	104
Tb927.1.4440	hypothetical protein, conserved	ZUnknown	263	136	239	208	200	543	376	270	8	5	6	7	8	7	7	12
Tb927.7.5380	DRBD12	RNA.binding	267	198	239	113	112	290	330	51	8	7	6	4	4	4	6	2
Tb927.10.15980	hypothetical protein	ZUnknown	274	69	52	48	56	140	112	36	8	2	1	2	2	2	2	2
Tb927.10.12270	methyltransferase domain containing protein, putative	ZUnknown	276	95	537	446	536	1556	704	248	8	3	14	16	20	20	12	11
Tb927.10.12760	ZC3H36	RNA.binding	279	190	368	134	177	411	426	138	8	7	10	5	7	5	8	6
Tb927.1.2200	ZC3H4	RNA.binding	283	100	71	49	86	230	200	131	8	4	2	2	3	3	4	6
Tb927.8.4200	hypothetical protein, conserved, no domains, no yeast.human match	ZUnknown	283	207	97	45	167	346	405	79	8	7	3	2	6	4	7	3
Tb927.10.10210	procyclin-associated gene 4 (PAG4) protein (PAG4)	PAG	286	124	2326	1500	4209	10623	4842	1612	9	4	61	53	159	133	85	70
Tb927.11.10680	hypothetical protein	ZUnknown	290	163	112	89	127	369	322	198	9	6	3	3	5	5	6	9
Tb927.11.6650	hypothetical protein	ZUnknown	294	261	186	160	136	377	289	137	9	9	5	6	5	5	5	6
Tb927.10.10040	hypothetical protein	ZUnknown	300	199	326	223	240	694	477	315	9	7	9	8	9	9	8	14
Tb927.10.2710	ferredoxin, putative	Mito.pathway	302	252	264	202	156	399	243	82	9	9	7	7	6	5	4	4
Tb927.7.6300	WD domain, G-beta repeat, putative	ZUnknown	304	157	269	116	199	377	441	168	9	6	7	4	7	5	8	7
Tb927.4.2100	hypothetical protein	ZUnknown	313	164	184	127	140	353	327	105	9	6	5	4	5	4	6	5
Tb927.11.12700	hypothetical protein, conserved	ZUnknown	314	89	1088	880	1108	3826	1911	1404	9	3	29	31	42	48	34	61
Tb927.7.2430	hypothetical protein	ZUnknown	321	347	543	385	360	913	580	465	10	13	14	14	14	11	10	20
Tb927.10.6420	hypothetical protein	ZUnknown	323	206	253	175	215	527	468	249	10	7	7	6	8	7	8	11
Tb927.10.15040	hypothetical protein, conserved	ZUnknown	325	181	136	65	136	234	194	58	10	7	4	2	5	3	3	3
Tb927.11.410	hypothetical protein, conserved	ZUnknown	329	146	739	615	600	1713	1420	1090	10	5	20	22	23	22	25	47
Tb927.10.7640	hypothetical protein	ZUnknown	343	243	310	242	284	690	583	351	10	9	8	9	11	9	10	15
Tb927.9.15690	hypothetical protein	ZUnknown	344	364	202	125	258	724	491	197	10	13	5	4	10	9	9	9
Tb927.11.7260	hypothetical protein, conserved	ZUnknown	345	292	1793	1465	969	3680	2609	1752	10	11	47	52	37	46	46	76
Tb927.11.2820	hypothetical protein, conserved	ZUnknown	347	145	92	44	99	175	208	46	10	5	2	2	4	2	4	2
Tb927.2.2140	hypothetical protein, conserved	ZUnknown	347	295	1824	1527	759	2514	1929	1203	10	11	48	54	29	32	34	52
Tb927.10.5410	hypothetical protein	ZUnknown	348	180	140	108	112	265	146	75	10	6	4	4	4	3	3	3
Tb927.3.2380	hypothetical protein, conserved	ZUnknown	348	308	553	391	473	1429	1046	668	10	11	15	14	18	18	18	29
Tb927.9.4550	hypothetical protein, conserved	ZUnknown	349	319	2247	1670	1039	3265	2402	1436	10	11	59	59	39	41	42	63
Tb927.10.13410	hypothetical protein	ZUnknown	353	169	474	384	342	955	692	381	11	6	13	14	13	12	12	17
Tb927.3.3700	hypothetical protein	ZUnknown	359	265	541	380	663	2035	1555	1322	11	10	14	13	25	26	27	58
Tb927.2.3330	hypothetical protein	ZUnknown	361	194	75	34	183	525	346	97	11	7	2	1	7	7	6	4
Tb927.3.1650	hypothetical protein	ZUnknown	362	259	120	57	192	351	413	115	11	9	3	2	7	4	7	5
Tb927.7.3730	RBP26	RNA.binding	362	231	80	45	92	158	194	20	11	8	2	2	3	2	3	1
Tb927.10.13340	hypothetical protein, conserved	ZUnknown	369	406	723	585	709	2433	1568	1161	11	15	19	21	27	31	28	51
Tb927.11.8470	ZC3H45	RNA.binding	369	213	126	68	311	670	847	268	11	8	3	2	12	8	15	12
Tb927.3.1630	CK1 casein kinase 1	Protein.kinase	370	331	369	122	344	758	793	469	11	12	10	4	13	10	14	20
Tb927.5.2560	hypothetical protein, conserved, no known domains	ZUnknown	371	769	10429	10204	4365	15552	10497	5048	11	28	276	359	165	195	185	220
Tb927.10.5730	hypothetical protein	ZUnknown	373	128	654	443	514	1310	777	233	11	5	17	16	19	16	14	10
Tb927.5.2360	hypothetical protein, conserved	ZUnknown	374	389	255	85	164	292	324	112	11	14	7	3	6	4	6	5
Tb927.6.4110	hypothetical protein	ZUnknown	384	376	438	271	380	934	713	461	11	14	12	10	14	12	13	20
Tb927.10.15310	hypothetical protein, conserved, linked to melarsoprol resistance, no yeast/human by NCBI	ZUnknown	385	145	269	124	167	267	329	51	11	5	7	4	6	3	6	2
Tb927.4.4230	RBP31, in silico screen suggests component of motile flagellae.	RNA.binding	386	237	204	127	194	334	316	99	12	9	5	4	7	4	6	4
Tb927.5.2480	hypothetical protein, conserved	ZUnknown	386	638	829	354	1641	3647	3457	1680	12	23	22	12	62	46	61	73
Tb927.7.6710	hypothetical protein	ZUnknown	388	247	317	242	279	642	491	227	12	9	8	9	11	8	9	10
Tb927.8.6310	hypothetical protein, conserved	ZUnknown	391	151	503	385	684	2123	1514	1173	12	5	13	14	26	27	27	51
Tb927.11.16170	hypothetical protein, conserved, signal peptide	ZUnknown	394	279	1128	827	873	2530	1590	1011	12	10	30	29	33	32	28	44
Tb927.9.2890	hypothetical protein	ZUnknown	394	205	200	115	118	355	246	170	12	7	5	4	4	4	4	7
Tb927.8.6570	hypothetical protein, conserved	ZUnknown	397	515	1530	1064	909	2347	1763	1072	12	19	40	37	34	29	31	47
Tb927.6.3910	hypothetical protein, conserved	ZUnknown	398	287	395	269	406	1252	992	715	12	10	10	9	15	16	17	31
Tb927.11.10290	hypothetical protein, conserved	ZUnknown	403	223	297	232	194	508	388	132	12	8	8	8	7	6	7	6
Tb927.11.12140	hypothetical protein	ZUnknown	405	421	282	154	227	553	502	156	12	15	7	5	9	7	9	7
Tb927.9.4310	tricarboxylate carrier, putative	Mito.pathway	405	234	2491	1504	1210	2971	2050	799	12	8	66	53	46	37	36	35
Tb927.10.12610	hypothetical protein	ZUnknown	406	207	196	178	158	359	291	108	12	7	5	6	6	5	5	5
Tb927.7.7370	hypothetical protein	ZUnknown	408	323	879	677	741	2220	1573	1053	12	12	23	24	28	28	28	46
Tb927.8.480	phosphatidic acid phosphatase protein, putative	Lipids	410	707	1619	1165	5687	25108	6491	3212	12	25	43	41	214	315	114	140
Tb927.10.6270	hypothetical protein	ZUnknown	411	294	670	461	541	1509	1165	609	12	11	18	16	20	19	21	27
Tb927.11.5080	hypothetical protein, conserved	ZUnknown	411	359	188	108	404	977	861	517	12	13	5	4	15	12	15	23
Tb927.8.2170	hypothetical protein, conserved	ZUnknown	412	251	773	575	657	1940	1265	710	12	9	20	20	25	24	22	31
Tb927.11.2450	hypothetical protein	ZUnknown	414	289	267	158	270	759	693	346	12	10	7	6	10	10	12	15
Tb927.10.6200	hypothetical protein, conserved, no clear yeast or human matches	Mito.pathway	416	377	9666	6668	2262	7143	5247	2362	12	14	256	235	85	90	92	103
Tb927.11.15380	hypothetical protein	ZUnknown	418	203	146	146	165	356	316	100	12	7	4	5	6	4	6	4
Tb927.8.500	hypothetical protein	ZUnknown	423	303	5800	5218	7451	33015	11276	4275	13	11	153	184	281	415	199	186
Tb927.10.480	hypothetical protein, conserved, poly(Q), Kinetoplastid-specific	ZUnknown	431	367	358	186	209	559	453	68	13	13	9	7	8	7	8	3
Tb927.7.520	cytochrome b5-like Heme/Steroid binding domain containing protein, putative	ZUnknown	432	310	616	283	556	1187	964	448	13	11	16	10	21	15	17	20
Tb927.8.5350	hypothetical protein, conserved	ZUnknown	435	140	420	313	294	729	440	123	13	5	11	11	11	9	8	5
Tb927.10.3630	hypothetical protein, conserved	ZUnknown	436	175	415	387	275	787	427	120	13	6	11	14	10	10	8	5
Tb927.10.3190	hypothetical protein	ZUnknown	438	211	344	292	337	886	742	305	13	8	9	10	13	11	13	13
Tb927.6.1710	hypothetical protein, conserved	ZUnknown	446	377	512	297	325	870	673	259	13	14	14	10	12	11	12	11
Tb927.10.10230	procyclin-associated gene 5 (PAG5) protein (PAG5)	PAG	452	227	2427	1869	3826	9230	6301	1536	13	8	64	66	144	116	111	67
Tb927.7.6430	hypothetical protein	ZUnknown	459	318	213	169	422	1313	1215	506	14	11	6	6	16	16	21	22
Tb927.4.2660	hypothetical protein, conserved	ZUnknown	460	431	1927	1457	1082	3719	2467	1560	14	16	51	51	41	47	43	68
Tb927.7.4800	hypothetical protein, conserved	ZUnknown	462	470	967	695	815	2712	2011	1445	14	17	26	24	31	34	35	63
Tb927.2.2270	hypothetical protein, conserved	ZUnknown	466	296	1689	1175	1081	3192	2117	1068	14	11	45	41	41	40	37	47
Tb927.10.2420	hypothetical protein	ZUnknown	467	186	135	144	180	508	407	178	14	7	4	5	7	6	7	8
Tb927.11.15200	hypothetical protein, conserved	ZUnknown	470	571	832	579	938	3039	1847	993	14	21	22	20	35	38	33	43
Tb927.6.420	hypothetical protein	ZUnknown	472	279	460	327	348	1057	849	327	14	10	12	12	13	13	15	14
Tb927.5.2630	hypothetical protein, conserved	ZUnknown	474	856	990	755	992	2759	2273	953	14	31	26	27	37	35	40	42
Tb927.6.1790	hypothetical protein	ZUnknown	474	405	216	101	261	397	344	74	14	15	6	4	10	5	6	3
Tb927.11.11840	hypothetical protein, conserved	ZUnknown	478	450	688	502	548	1730	1305	663	14	16	18	18	21	22	23	29
Tb927.11.12690	hypothetical protein, conserved	ZUnknown	482	140	757	636	603	1486	839	206	14	5	20	22	23	19	15	9
Tb927.4.830	cytochrome c oxidase assembly protein PET191, putative	Mito.pathway	485	200	1417	1061	707	2505	1737	755	14	7	37	37	27	31	31	33
Tb927.5.2760	UDP-Gal or UDP-GlcNAc-dependent glycosyltransferase, putative	Glycans	486	755	1055	569	1860	5979	4620	2279	15	27	28	20	70	75	81	99
Tb927.9.10170	predicted zinc finger protein	Zinc.finger	487	270	613	481	618	1911	1318	828	15	10	16	17	23	24	23	36
Tb927.9.7270	hypothetical protein	ZUnknown	488	266	288	201	210	465	408	94	15	10	8	7	8	6	7	4
Tb927.1.2420	hypothetical protein	ZUnknown	491	176	64	70	77	214	183	48	15	6	2	2	3	3	3	2
Tb927.10.14940	hypothetical protein	ZUnknown	493	494	619	389	473	1349	1083	578	15	18	16	14	18	17	19	25
Tb927.10.610	hypothetical protein, conserved	ZUnknown	499	274	206	130	199	377	324	77	15	10	5	5	7	5	6	3
Tb927.11.12330	hypothetical protein, conserved	ZUnknown	505	457	734	555	689	1939	1475	915	15	16	19	20	26	24	26	40
Tb927.11.16790	DYRK2 mitogen-activated protein kinase	Protein.kinase	505	345	230	80	199	324	428	110	15	12	6	3	7	4	8	5
Tb927.11.200	DNA-directed RNA polymerase subunit, putative, (RPB6z)	RNA.synthesis	505	485	917	693	660	1916	1367	750	15	17	24	24	25	24	24	33
Tb927.5.3130	hypothetical protein	ZUnknown	508	301	663	287	290	551	578	173	15	11	18	10	11	7	10	8
Tb927.1.3890	hypothetical protein	ZUnknown	509	132	123	119	105	271	161	70	15	5	3	4	4	3	3	3
Tb927.9.6890	hypothetical protein, conserved	ZUnknown	511	334	1230	965	769	2304	1342	460	15	12	33	34	29	29	24	20
Tb927.6.690	hypothetical protein, conserved, no clear yeast or human matches	ZUnknown	513	345	443	234	466	961	1053	209	15	12	12	8	18	12	19	9
Tb927.7.7380	LSm3	RNA.processing	521	334	1029	983	962	3484	2553	1536	16	12	27	35	36	44	45	67
Tb927.10.4400	hypothetical protein, conserved, no domains, kinetoplastid specific	ZUnknown	523	388	293	208	341	1093	984	429	16	14	8	7	13	14	17	19
Tb927.10.8730	ABC1 family, putative	Mito.pathway	526	311	636	298	413	716	542	98	16	11	17	10	16	9	10	4
Tb927.5.2670	hypothetical protein, conserved	ZUnknown	526	846	1950	1433	1435	4469	3486	2195	16	30	52	50	54	56	61	96
Tb927.8.3120	Uncharacterised protein family UPF0546, putative	ZUnknown	526	260	800	561	776	2761	2334	1881	16	9	21	20	29	35	41	82
Tb927.5.2840	hypothetical protein, conserved	ZUnknown	527	264	1545	1200	1123	3241	2260	1300	16	10	41	42	42	41	40	57
Tb927.11.15670	hypothetical protein	ZUnknown	528	398	1475	1080	1362	4141	2975	2562	16	14	39	38	51	52	52	112
Tb927.11.15720	hypothetical protein	ZUnknown	528	304	218	131	194	518	476	138	16	11	6	5	7	7	8	6
Tb927.7.5780	thioredoxin, putative	ZUnknown	530	369	866	532	442	1406	1328	622	16	13	23	19	17	18	23	27
Tb927.10.7530	hypothetical protein	ZUnknown	531	182	151	144	128	346	275	113	16	7	4	5	5	4	5	5
Tb927.9.10950	chaperone protein DNAj, putative	Chaperone	531	463	472	234	446	869	756	358	16	17	12	8	17	11	13	16
Tb927.11.780	hypothetical protein, conserved	ZUnknown	532	187	200	103	111	207	222	63	16	7	5	4	4	3	4	3
Tb927.8.3420	hypothetical protein, conserved	ZUnknown	533	276	1077	838	1589	5169	3236	2747	16	10	28	29	60	65	57	120
Tb927.9.4850	leucine-rich repeat protein (LRRP)	LRRP	533	341	2456	1777	1500	5126	3404	1773	16	12	65	63	57	64	60	77
Tb927.6.2030	protein kinase, putative	Protein.kinase	535	346	405	175	264	450	543	113	16	12	11	6	10	6	10	5
Tb927.10.5740	Protein of unknown function (DUF778), putative	ZUnknown	536	206	1119	844	845	2111	1397	334	16	7	30	30	32	27	25	15
Tb927.3.5250	ZC3H8	RNA.binding	536	399	359	165	301	468	487	86	16	14	9	6	11	6	9	4
Tb927.4.1910	hypothetical protein, conserved, no domains, K-specific	ZUnknown	536	389	506	248	404	791	681	98	16	14	13	9	15	10	12	4
Tb927.6.820	PUF4	RNA.binding	539	237	148	77	156	272	357	48	16	9	4	3	6	3	6	2
Tb927.1.3320	leucine-rich repeat protein (LRRP)	LRRP	540	281	346	222	348	1013	1041	500	16	10	9	8	13	13	18	22
Tb927.3.2030	acylphosphatase, putative	Lipids	540	392	898	656	877	2899	2017	1485	16	14	24	23	33	36	36	65
Tb927.6.3200	hypothetical protein, conserved	ZUnknown	541	518	702	542	665	2143	1906	1244	16	19	19	19	25	27	34	54
Tb927.11.12130	hypothetical protein	ZUnknown	542	506	351	175	274	642	606	137	16	18	9	6	10	8	11	6
Tb927.4.2610	hypothetical protein	ZUnknown	543	223	162	117	165	406	349	144	16	8	4	4	6	5	6	6
Tb927.8.5360	hypothetical protein, conserved	ZUnknown	543	223	521	364	674	1981	1417	476	16	8	14	13	25	25	25	21
Tb927.9.10280	ZC3H48	RNA.binding	543	371	165	84	280	680	848	193	16	13	4	3	11	9	15	8
Tb927.3.2930	RBP6	RNA.binding	544	373	786	509	552	1585	1502	471	16	13	21	18	21	20	26	21
Tb927.5.460	hypothetical protein, conserved	ZUnknown	546	448	1437	1141	969	2858	2042	1271	16	16	38	40	37	36	36	55
Tb927.10.5150	ZC3H31	RNA.binding	548	382	197	105	197	484	938	158	16	14	5	4	7	6	17	7
Tb927.7.1160	hypothetical protein, conserved	ZUnknown	550	221	858	644	1015	3069	2598	1966	16	8	23	23	38	39	46	86
Tb927.10.12300	hypothetical protein, conserved	ZUnknown	553	341	1090	769	768	2398	1864	976	17	12	29	27	29	30	33	43
Tb927.10.1780	hypothetical protein	ZUnknown	554	294	161	104	210	601	502	217	17	11	4	4	8	8	9	9
Tb927.9.1640	hypothetical protein, conserved	ZUnknown	555	380	696	532	658	2038	1456	858	17	14	18	19	25	26	26	37
Tb927.11.3040	hypothetical protein	ZUnknown	556	502	1265	935	1012	3377	2149	1156	17	18	33	33	38	42	38	50
Tb927.11.490	hypothetical protein, conserved	ZUnknown	556	470	501	388	593	1841	2160	1371	17	17	13	14	22	23	38	60
Tb927.11.10040	hypothetical protein, conserved, no known domains	ZUnknown	557	493	2377	1723	1105	3283	2317	1154	17	18	63	61	42	41	41	50
Tb07.26A24.210	hypothetical protein	ZUnknown	561	538	912	723	611	1557	1064	491	17	19	24	25	23	20	19	21
Tb927.2.2590	hypothetical protein, conserved	ZUnknown	561	477	1498	1174	1088	3780	2431	1794	17	17	40	41	41	47	43	78
Tb927.11.4310	hypothetical protein	ZUnknown	562	375	557	433	284	727	497	193	17	14	15	15	11	9	9	8
Tb927.9.13480	Eukaryotic protein of unknown function (DUF1764), putative	ZUnknown	562	358	1012	755	687	2043	1774	1184	17	13	27	27	26	26	31	52
Tb927.11.14670	hypothetical protein, conserved	ZUnknown	566	419	949	719	884	3191	2060	1600	17	15	25	25	33	40	36	70
Tb927.10.10110	PIG-P, putative	ZUnknown	567	306	730	534	530	1588	1222	801	17	11	19	19	20	20	22	35
Tb927.1.3800	POMP18	Mito.membrane	572	491	1777	1249	985	2823	2211	1163	17	18	47	44	37	35	39	51
Tb11.02.5410	SUMO activating enzyme AOS1	Ubiquitin.proteasome	574	309	1042	753	793	2190	1806	757	17	11	28	26	30	28	32	33
Tb927.2.3920	Complex 1 protein (LYR family), putative	ZUnknown	574	216	2110	1575	1526	4457	3210	2117	17	8	56	55	58	56	57	92
Tb927.11.2860	hypothetical protein, conserved	ZUnknown	575	216	148	95	105	196	252	53	17	8	4	3	4	2	4	2
Tb927.5.3340	Tim11	Mito.biogenesis	576	403	1951	1291	724	2108	1303	478	17	15	52	45	27	26	23	21
Tb927.11.13430	hypothetical protein	ZUnknown	578	472	551	367	474	1244	904	241	17	17	15	13	18	16	16	10
Tb927.8.3570	Zinc finger, C3HC4 type (RING finger), putative	Zinc.finger	580	427	617	286	750	1711	1301	408	17	15	16	10	28	21	23	18
Tb927.2.2200	hypothetical protein, conserved	ZUnknown	583	240	1105	950	836	2465	1302	493	17	9	29	33	32	31	23	21
Tb927.8.1730	hypothetical protein, conserved	ZUnknown	585	172	1103	827	962	3016	2497	1713	17	6	29	29	36	38	44	75
Tb927.9.1590	hypothetical protein, conserved, weakly matches human ferrochelateases because of twin Cys-X9-Cys motifs	ZUnknown	585	456	2947	2082	922	2524	2155	1021	17	16	78	73	35	32	38	44
Tb927.10.260	BolA-like protein, putative	ZUnknown	586	366	874	609	866	2618	2169	1629	17	13	23	21	33	33	38	71
Tb927.2.2540	Ribosome biogenesis protein SLX9, putative	ZUnknown	587	352	1645	1366	898	2659	1925	891	18	13	43	48	34	33	34	39
Tb927.11.14510	hypothetical protein	ZUnknown	589	395	435	258	378	958	765	211	18	14	11	9	14	12	13	9
Tb927.3.3680	hypothetical protein, conserved	Mito.pathway	589	272	349	269	196	577	397	119	18	10	9	9	7	7	7	5
Tb927.5.2590	Macro domain containing protein, putative	ZUnknown	590	743	2254	1637	1658	5422	4519	2188	18	27	60	58	62	68	80	95
Tb927.9.9370	PSP1 C-terminal conserved region, putative	ZUnknown	590	346	468	182	220	405	455	78	18	12	12	6	8	5	8	3
Tb927.9.10930	hypothetical protein, conserved	ZUnknown	592	498	1443	982	1649	5412	3381	2512	18	18	38	35	62	68	60	109
Tb927.3.5670	hypothetical protein	ZUnknown	595	663	99	50	181	496	394	138	18	24	3	2	7	6	7	6
Tb927.1.1500	conserved protein, unknown function	ZUnknown	596	382	89	71	150	325	437	55	18	14	2	2	6	4	8	2
Tb927.7.6220	protein kinase, putative	Protein.kinase	597	325	575	348	507	1032	925	164	18	12	15	12	19	13	16	7
Tb927.11.160	hypothetical protein, conserved	ZUnknown	598	566	811	596	1033	3268	2315	1692	18	20	21	21	39	41	41	74
Tb927.4.1010	hypothetical protein	ZUnknown	601	406	565	502	449	863	524	178	18	15	15	18	17	11	9	8
Tb927.11.6330	6-phosphoglucolactonase	Glucose.glycerol	603	330	2017	1587	1750	5704	3409	2318	18	12	53	56	66	72	60	101
Tb927.5.3180	hypothetical protein, conserved	ZUnknown	604	547	484	407	473	1575	1306	710	18	20	13	14	18	20	23	31
Tb927.8.5550	hypothetical protein, conserved, kineto-specific	ZUnknown	604	349	693	432	654	1925	1624	856	18	13	18	15	25	24	29	37
Tb927.1.2310	hypothetical protein	ZUnknown	605	483	2672	1603	1103	2365	1525	553	18	17	71	56	42	30	27	24
Tb927.10.9030	Mechanosensitive ion channel, putative	ZUnknown	607	452	906	628	806	2782	2042	1179	18	16	24	22	30	35	36	51
Tb927.11.380	B9 domain-containing protein 2 (b9d2)	ZUnknown	611	520	833	690	556	1793	1505	677	18	19	22	24	21	23	27	29
Tb927.9.2150	hypothetical protein	ZUnknown	611	432	575	484	406	980	730	203	18	16	15	17	15	12	13	9
Tb927.4.1380	D-Tyr-tRNA(Tyr) deacylase, putative	ZUnknown	614	459	1085	880	715	2267	1872	992	18	17	29	31	27	28	33	43
Tb927.8.5150	hypothetical protein, conserved	ZUnknown	615	576	2912	2097	1189	3720	2863	1987	18	21	77	74	45	47	50	87
Tb927.11.4760	hypothetical protein	ZUnknown	619	691	2800	2211	1051	2847	2215	967	18	25	74	78	40	36	39	42
Tb927.10.3400	hypothetical protein, conserved	ZUnknown	620	525	236	109	164	415	439	53	19	19	6	4	6	5	8	2
Tb927.3.1540	CAAX prenyl protease 2, putative,peptidase with unknown catalytic mechanism (family U48)	Protease	621	470	770	581	782	2351	1793	1105	19	17	20	20	29	30	32	48
Tb927.7.7020	hypothetical protein	ZUnknown	623	287	412	341	315	835	620	313	19	10	11	12	12	10	11	14
Tb927.10.4540	ARP2/3 complex subunit, putative	Cytoskeleton	625	340	631	442	605	1645	1505	722	19	12	17	16	23	21	27	31
Tb927.4.2690	hypothetical protein	ZUnknown	625	617	524	365	605	1968	1491	626	19	22	14	13	23	25	26	27
Tb927.10.14270	TFIIF-stimulated CTD phosphatase, putative	Protein.phosphatase	627	314	150	110	141	242	331	82	19	11	4	4	5	3	6	4
Tb927.2.3720	ubiquitin-conjugating enzyme, putative	Ubiquitin.proteasome	627	545	436	237	403	932	809	173	19	20	12	8	15	12	14	8
Tb927.6.3360	hypothetical protein, conserved	Mito.pathway	631	570	621	539	643	2206	1855	937	19	21	16	19	24	28	33	41
Tb927.2.5070	hypothetical protein, conserved	ZUnknown	634	745	1057	805	896	2889	2002	1202	19	27	28	28	34	36	35	52
Tb927.4.3780	hypothetical protein, conserved	ZUnknown	635	619	690	432	784	2618	2210	1434	19	22	18	15	30	33	39	62
Tb927.10.440	hypothetical protein, conserved	ZUnknown	639	559	801	521	675	2132	1777	1208	19	20	21	18	25	27	31	53
Tb927.11.300	hypothetical protein, conserved	ZUnknown	639	654	867	667	788	2499	2382	1168	19	24	23	23	30	31	42	51
Tb927.6.2070	hypothetical protein, conserved	ZUnknown	639	326	877	708	353	907	585	174	19	12	23	25	13	11	10	8
Tb927.10.2170	hypothetical protein	ZUnknown	641	606	1026	602	581	1775	1312	516	19	22	27	21	22	22	23	22
Tb927.10.3270	hypothetical protein, conserved, in plasma membrane and mito membrane proteomes	ZUnknown	641	488	1360	974	930	2842	2153	1350	19	18	36	34	35	36	38	59
Tb927.11.6190	hypothetical protein, conserved	ZUnknown	641	712	1029	779	1067	3399	2590	1921	19	26	27	27	40	43	46	84
Tb927.8.3760	hypothetical protein	ZUnknown	642	420	435	285	477	1170	856	256	19	15	11	10	18	15	15	11
Tb927.11.13170	hypothetical protein, conserved	ZUnknown	644	266	1924	1533	1793	5336	3347	1238	19	10	51	54	68	67	59	54
Tb927.5.2830	hypothetical protein, conserved	ZUnknown	646	424	1140	852	778	2157	1543	764	19	15	30	30	29	27	27	33
Tb927.11.2480	hypothetical protein	ZUnknown	647	261	111	76	121	289	230	92	19	9	3	3	5	4	4	4
Tb927.11.13630	hypothetical protein, conserved	ZUnknown	648	298	99	90	140	209	260	76	19	11	3	3	5	3	5	3
Tb927.7.4210	hypothetical protein, conserved	ZUnknown	649	455	1368	1003	843	2557	1864	1105	19	16	36	35	32	32	33	48
Tb927.10.5800	hypothetical protein, conserved	ZUnknown	651	477	655	517	525	1255	992	496	19	17	17	18	20	16	17	22
Tb927.1.1990	Pre-mRNA-splicing factor 38, putative	RNA.processing	652	415	1013	741	1177	3676	2702	1708	19	15	27	26	44	46	48	74
Tb927.3.630	hypothetical protein, conserved	ZUnknown	657	653	1131	1036	1072	3661	2457	1563	20	24	30	36	40	46	43	68
Tb927.6.3210	adenylate kinase in T. cruzi, nuclear	Nucleotides	663	591	1463	1137	603	2053	1787	590	20	21	39	40	23	26	31	26
Tb927.10.900	hypothetical protein, conserved	ZUnknown	664	257	1117	828	794	2555	2315	1385	20	9	30	29	30	32	41	60
Tb927.8.3260	YceI-like domain containing protein, putative	ZUnknown	665	581	1055	816	775	2582	2010	1136	20	21	28	29	29	32	35	49
Tb927.10.13810	hypothetical protein, conserved	ZUnknown	666	644	1974	1596	1313	4358	3040	1941	20	23	52	56	49	55	54	85
Tb927.6.2610	hypothetical protein, conserved	ZUnknown	666	570	1630	1148	1164	3719	2550	1485	20	21	43	40	44	47	45	65
Tb927.1.2150	calpain-like protein fragment, putative,calpain-like cysteine peptidase, Clan CA, family C2	Protease	669	423	612	428	679	2263	2597	1974	20	15	16	15	26	28	46	86
Tb927.7.1520	hypothetical protein, conserved	ZUnknown	670	315	1163	868	1485	4522	2829	1989	20	11	31	31	56	57	50	87
Tb927.10.11350	Mitchondrial LSU ribosomal protein	Mito.translation	672	496	1665	1268	949	3153	2091	1155	20	18	44	45	36	40	37	50
Tb927.10.11060	hypothetical protein, conserved	ZUnknown	675	323	2655	1954	1224	4207	3218	1411	20	12	70	69	46	53	57	61
Tb927.11.10530	hypothetical protein, conserved	ZUnknown	675	439	620	403	613	1859	1610	952	20	16	16	14	23	23	28	41
Tb927.2.3190	Got1/Sft2-like family, putative	ZUnknown	675	626	1043	720	552	1503	1154	587	20	23	28	25	21	19	20	26
Tb927.7.7310	hypothetical protein	ZUnknown	675	276	211	162	184	393	292	183	20	10	6	6	7	5	5	8
Tb927.4.510	hypothetical protein, conserved	ZUnknown	677	566	984	778	895	2839	2118	1263	20	20	26	27	34	36	37	55
Tb927.8.6510	ubiquitin-conjugating enzyme e2, putative	Ubiquitin.proteasome	677	262	1396	985	1024	3007	2205	1377	20	9	37	35	39	38	39	60
Tb927.1.2160	calpain-like protein fragment, putative	Protease	679	512	889	624	481	1264	954	324	20	18	24	22	18	16	17	14
Tb927.9.9610	hypothetical protein, conserved	ZUnknown	680	314	1931	1462	1537	4960	3215	2028	20	11	51	51	58	62	57	88
Tb927.8.6190	BolA-like protein, putative	ZUnknown	681	622	1137	1022	1097	3847	3011	1677	20	22	30	36	41	48	53	73
Tb927.11.11960	hypothetical protein, conserved	ZUnknown	682	209	2136	1474	1758	4604	2574	673	20	8	56	52	66	58	45	29
Tb927.10.2120	U1 small nuclear ribonucleoprotein C, putative =U2A􏰎 (U2-40K)	RNA.processing	683	635	1369	964	1104	3283	2608	1731	20	23	36	34	42	41	46	75
Tb927.11.420	Fcf2 pre-rRNA processing, putative	rRNA.tRNA.process	684	656	910	649	697	2145	1748	949	20	24	24	23	26	27	31	41
Tb927.8.3600	hypothetical protein, conserved	ZUnknown	684	815	1015	722	723	2185	1774	1167	20	29	27	25	27	27	31	51
Tb927.4.3970	hypothetical protein, conserved, kinetoplastid-specific	ZUnknown	687	426	461	215	481	1059	1097	266	21	15	12	8	18	13	19	12
Tb927.11.220	hypothetical protein, conserved	ZUnknown	688	548	609	357	500	1412	1436	711	21	20	16	13	19	18	25	31
Tb927.5.2640	cytidylyltransferase, putative	ZUnknown	688	1202	2282	1786	1336	4413	3313	1568	21	43	60	63	50	55	58	68
Tb927.11.8360	hypothetical protein	ZUnknown	692	475	620	517	476	1283	794	192	21	17	16	18	18	16	14	8
Tb927.4.1420	hypothetical protein, conserved	ZUnknown	692	212	1361	1135	1393	4930	2728	844	21	8	36	40	52	62	48	37
Tb927.8.1760	hypothetical protein	ZUnknown	692	462	768	576	575	1441	1052	502	21	17	20	20	22	18	19	22
Tb927.7.5860	hypothetical protein	ZUnknown	693	498	654	418	597	1373	1099	378	21	18	17	15	22	17	19	16
Tb927.8.5800	hypothetical protein, conserved	ZUnknown	694	423	1326	997	1295	4391	3160	2200	21	15	35	35	49	55	56	96
Tb927.5.2610	hypothetical protein, conserved	ZUnknown	697	763	1209	921	1105	3100	2666	858	21	28	32	32	42	39	47	37
Tb927.9.10990	hypothetical protein	ZUnknown	698	458	447	364	456	1308	1213	413	21	17	12	13	17	16	21	18
Tb927.2.2570	GAP2	Mito.RNA	699	346	891	572	754	2211	1918	791	21	12	24	20	28	28	34	34
Tb927.9.10510	hypothetical protein, conserved	ZUnknown	699	507	958	685	679	2300	2008	770	21	18	25	24	26	29	35	34
Tb927.10.1290	hypothetical protein, conserved	ZUnknown	700	602	1022	823	1015	3033	2233	1206	21	22	27	29	38	38	39	53
Tb927.11.16710	hypothetical protein, conserved	ZUnknown	700	441	3567	2731	1923	5786	4197	2559	21	16	94	96	72	73	74	111
Tb927.3.5780	hypothetical protein	ZUnknown	702	389	94	77	88	305	396	71	21	14	2	3	3	4	7	3
Tb927.11.270	mitochondrial carrier protein, MCP10	Mito.transport	703	627	1667	1071	1075	3140	2634	1516	21	23	44	38	41	39	46	66
Tb927.5.3740	RING-H2 zinc finger, putative	ZUnknown	704	511	726	601	823	2534	1876	937	21	18	19	21	31	32	33	41
Tb927.8.1370	hypothetical protein, conserved	ZUnknown	708	841	1959	1562	1602	5477	3874	2534	21	30	52	55	60	69	68	110
Tb927.8.3360	hypothetical protein, conserved	ZUnknown	711	554	628	466	1237	3915	2538	2089	21	20	17	16	47	49	45	91
Tb927.7.4140	Mitchondrial LSU ribosomal protein	Mito.translation	712	277	1168	751	921	2724	2108	1200	21	10	31	26	35	34	37	52
Tb927.8.8320	hypothetical protein, conserved	ZUnknown	713	655	321	113	486	1168	1362	688	21	24	8	4	18	15	24	30
Tb927.10.2340	hypothetical protein, conserved, t-SNARE like	Vesicular.transport	717	527	1015	872	914	3120	2393	1019	21	19	27	31	34	39	42	44
Tb927.10.8260	hypothetical protein, conserved	ZUnknown	720	453	1022	725	859	2487	2010	1276	21	16	27	26	32	31	35	56
Tb927.3.2550	hypothetical protein, conserved	ZUnknown	721	267	13	8	43	114	99	21	22	10	0	0	2	1	2	1
Tb927.11.16220	Complex III cytochrome b/c complex	Mito.e.transport	723	503	2821	2125	969	2859	2503	1178	22	18	75	75	37	36	44	51
Tb927.10.1000	hypothetical protein	ZUnknown	728	186	1558	852	1617	4259	2826	1064	22	7	41	30	61	53	50	46
Tb927.10.15860	hypothetical protein, conserved	ZUnknown	728	305	860	636	581	1667	1139	453	22	11	23	22	22	21	20	20
Tb927.7.6210	hypothetical protein, conserved	ZUnknown	728	630	812	757	620	1439	950	221	22	23	21	27	23	18	17	10
Tb927.8.5670	hypothetical protein, conserved	ZUnknown	729	490	1286	1082	861	2386	1840	688	22	18	34	38	32	30	32	30
Tb927.4.2160	hypothetical protein, conserved	ZUnknown	731	408	849	724	756	2004	1452	612	22	15	22	25	28	25	26	27
Tb927.4.2960	hypothetical protein, conserved	ZUnknown	731	530	703	538	632	2065	1930	793	22	19	19	19	24	26	34	35
Tb927.2.2220	hypothetical protein, conserved	ZUnknown	734	411	768	525	573	1576	1330	353	22	15	20	18	22	20	23	15
Tb927.3.650	hypothetical protein, conserved	ZUnknown	736	618	677	521	1120	3990	2710	2152	22	22	18	18	42	50	48	94
Tb927.9.6960	hypothetical protein, conserved	ZUnknown	736	370	466	372	261	626	487	151	22	13	12	13	10	8	9	7
Tb927.9.14990	hypothetical protein, conserved, no clear yeast or human matches	ZUnknown	738	557	4657	3448	2106	7194	4620	2237	22	20	123	121	79	90	81	97
Tb927.3.1960	hypothetical protein, conserved	ZUnknown	740	780	1397	900	811	2309	1846	806	22	28	37	32	31	29	33	35
Tb927.4.2540	ubiquitin, putative	Ubiquitin.proteasome	740	461	1009	790	1105	3618	2481	1286	22	17	27	28	42	45	44	56
Tb927.11.9850	hypothetical protein, conserved	ZUnknown	741	666	1085	820	1116	3966	2872	2019	22	24	29	29	42	50	51	88
Tb927.9.3530	LSm6	RNA.processing	741	567	1208	1026	1176	3752	3135	1734	22	20	32	36	44	47	55	76
Tb927.4.3710	Predicted membrane protein, putative	ZUnknown	742	530	1116	807	887	2403	1684	1080	22	19	30	28	33	30	30	47
Tb927.8.1290	hypothetical protein, conserved, no domains, copurifies with ZC3H32	ZUnknown	742	256	75	54	79	142	124	37	22	9	2	2	3	2	2	2
Tb927.9.13310	hypothetical protein, conserved, predicted GPI anchor	Membrane.protein	747	516	958	776	894	3135	2489	1584	22	19	25	27	34	39	44	69
Tb927.6.1240	hypothetical protein, conserved	ZUnknown	748	589	1384	1142	1104	3654	2219	1309	22	21	37	40	42	46	39	57
Tb927.4.1670	POMP29, cytochrome b5-like haem-binding domain	Mito.e.transport	749	586	2829	2304	1333	4087	2759	1507	22	21	75	81	50	51	49	66
Tb927.4.390	hypothetical protein, conserved	ZUnknown	753	564	1352	1049	1211	3733	2796	2228	22	20	36	37	46	47	49	97
Tb927.6.860	hypothetical protein	ZUnknown	753	376	401	191	334	591	499	130	22	14	11	7	13	7	9	6
Tb927.11.1590	hypothetical protein, conserved	ZUnknown	755	546	1574	1200	1279	3717	2668	1289	23	20	42	42	48	47	47	56
Tb927.10.1640	hypothetical protein	ZUnknown	756	454	324	194	668	1675	1330	491	23	16	9	7	25	21	23	21
Tb927.4.340	hypothetical protein, conserved	ZUnknown	756	610	984	656	825	2642	1755	737	23	22	26	23	31	33	31	32
Tb927.8.2340	hypothetical protein, conserved	ZUnknown	760	560	1507	1033	2271	7241	4276	2763	23	20	40	36	86	91	75	120
Tb927.7.1180	RBP19	RNA.binding	761	413	1621	1131	981	3075	2179	1292	23	15	43	40	37	39	38	56
Tb927.5.690	hypothetical protein, conserved	ZUnknown	765	241	737	624	443	1205	817	252	23	9	19	22	17	15	14	11
Tb927.3.2580	Fam5 cell surface protein	Membrane.protein	766	306	15	8	49	146	114	30	23	11	0	0	2	2	2	1
Tb927.3.5410	hypothetical protein, conserved, no clear yeast or human matches	ZUnknown	768	617	3437	2530	1225	3792	3223	1917	23	22	91	89	46	48	57	84
Tb927.4.4320	divalent cation tolerance protein, putative	ZUnknown	768	462	1558	1140	1164	4118	3469	1855	23	17	41	40	44	52	61	81
Tb927.1.1630	transcription elongation factor 1 homolog (ELOF1)	RNA.synthesis	772	368	1106	808	837	2491	1923	1054	23	13	29	28	32	31	34	46
Tb927.8.3160	hypothetical protein, conserved	ZUnknown	772	549	428	334	275	790	646	189	23	20	11	12	10	10	11	8
Tb927.3.4050	hypothetical protein, conserved	ZUnknown	777	392	1863	1432	1738	5376	4089	3045	23	14	49	50	66	68	72	133
Tb927.11.13370	hypothetical protein, conserved	ZUnknown	778	289	878	656	677	1906	1656	616	23	10	23	23	26	24	29	27
Tb927.7.3690	hypothetical protein	ZUnknown	779	577	672	357	655	1291	973	313	23	21	18	13	25	16	17	14
Tb927.7.7350	hypothetical protein	ZUnknown	779	395	627	500	393	975	608	213	23	14	17	18	15	12	11	9
Tb927.5.2580	hypothetical protein, possible component of cytochorome oxidase complex	Mito.e.transport	780	909	2809	2262	1309	3440	2095	373	23	33	74	80	49	43	37	16
Tb927.9.8320	hypothetical protein	ZUnknown	781	468	340	233	382	935	707	190	23	17	9	8	14	12	12	8
Tb927.10.6770	BRCA1 C Terminus (BRCT) domain containing protein, putative	ZUnknown	784	810	766	509	786	2230	2020	1374	23	29	20	18	30	28	36	60
Tb927.1.1770	glutaredoxin GRX2	Redox	785	713	1820	1289	935	2899	2058	1180	23	26	48	45	35	36	36	51
Tb927.7.350	hypothetical protein	ZUnknown	785	330	875	535	653	1827	1648	789	23	12	23	19	25	23	29	34
Tb927.4.3960	hypothetical protein, conserved	ZUnknown	786	692	1024	706	1005	3138	2481	1564	23	25	27	25	38	39	44	68
Tb927.7.7390	hypothetical protein	ZUnknown	786	256	874	651	862	2793	2720	1926	23	9	23	23	32	35	48	84
Tb927.8.7290	Regulator of chromosome condensation (RCC1) repeat, putative	ZUnknown	787	165	800	603	741	1631	1125	295	23	6	21	21	28	20	20	13
Tb927.10.8050	TFIIF-stimulated CTD phosphatase, putative	Protein.phosphatase	789	332	908	438	531	1082	1023	230	24	12	24	15	20	14	18	10
Tb927.10.4090	hypothetical protein, conserved	ZUnknown	790	265	2024	1560	1664	5612	3299	1974	24	10	54	55	63	70	58	86
Tb927.10.11610	SKP1-like protein	Ubiquitin.proteasome	791	471	1392	903	911	2718	2259	1294	24	17	37	32	34	34	40	56
Tb927.4.2420	hypothetical protein, conserved	ZUnknown	791	705	1333	951	1152	4136	2940	2072	24	25	35	33	43	52	52	90
Tb927.8.3070	hypothetical protein, conserved	ZUnknown	791	599	1872	1311	1444	4262	3232	2564	24	22	49	46	54	54	57	112
Tb927.10.8160	hypothetical protein, conserved	ZUnknown	798	354	1198	983	1224	3538	2817	2082	24	13	32	35	46	44	50	91
Tb927.11.11040	hypothetical protein, conserved	ZUnknown	799	229	1513	1078	1485	4808	3701	2254	24	8	40	38	56	60	65	98
Tb927.4.2980	hypothetical protein, conserved	ZUnknown	799	591	575	425	712	1994	2037	1130	24	21	15	15	27	25	36	49
Tb927.10.16060	hypothetical protein, conserved	ZUnknown	800	703	3768	2876	1703	5469	3941	1955	24	25	100	101	64	69	69	85
Tb927.10.4280	Complex III cytochrome b/c complex, Cytochrome bd ubiquinol oxidase, 14kDa subunit	Mito.e.transport	800	695	12042	9305	3005	8564	6465	2085	24	25	318	327	113	108	114	91
Tb927.3.3570	hypothetical protein, conserved, no clear yeast or human matches	ZUnknown	800	540	1519	1160	1041	2862	2366	1279	24	19	40	41	39	36	42	56
Tb927.11.16440	Transmembrane protein 18, putative	ZUnknown	801	526	787	605	736	2185	1873	1109	24	19	21	21	28	27	33	48
Tb927.10.9580	hypothetical protein	ZUnknown	802	476	1364	891	1075	2826	1986	1113	24	17	36	31	41	35	35	48
Tb927.11.15540	hypothetical protein, conserved	ZUnknown	802	669	1272	944	1106	2931	2158	1234	24	24	34	33	42	37	38	54
Tb927.4.4630	hypothetical protein, conserved	ZUnknown	802	563	1696	1201	899	2739	1920	885	24	20	45	42	34	34	34	39
Tb927.11.8130	ATP synthase subunit H, putative	ZUnknown	803	664	661	528	678	2228	1677	724	24	24	17	19	26	28	30	32
Tb927.7.7010	Mitchondrial LSU ribosomal protein	Mito.translation	803	660	1384	1150	885	2747	2189	772	24	24	37	40	33	35	39	34
Tb927.11.14070	RDK1 protein kinase	Protein.kinase	804	334	221	116	193	382	386	149	24	12	6	4	7	5	7	6
Tb927.3.2560	hypothetical protein, conserved	ZUnknown	804	293	15	9	50	128	112	22	24	11	0	0	2	2	2	1
Tb11.02.5430	hypothetical protein, conserved	ZUnknown	805	234	685	629	431	993	730	175	24	8	18	22	16	12	13	8
Tb927.8.2040	Domain of unknown function (DUF1767), putative	ZUnknown	806	281	673	560	398	976	685	182	24	10	18	20	15	12	12	8
Tb927.5.2540	Organic solute transport protein 1, putative	ZUnknown	807	1115	1367	1014	1032	2990	1974	317	24	40	36	36	39	38	35	14
Tb927.11.6600	hypothetical protein, conserved	ZUnknown	809	415	279	170	185	329	481	72	24	15	7	6	7	4	8	3
Tb927.3.4890	ubiquinone biosynthesis protein COQ7 homolog, putative	Mito.pathway	809	737	1722	1320	1337	4580	3428	2184	24	27	46	46	50	58	60	95
Tb927.7.5760	MTR2	Nuclear.transport	811	717	2450	1698	1156	3604	2650	949	24	26	65	60	44	45	47	41
Tb927.4.4390	hypothetical protein	ZUnknown	813	650	617	488	541	1746	1655	548	24	23	16	17	20	22	29	24
Tb927.4.440	NADH-ubiquinone oxidoreductase complex I subunit, putative	Mito.pathway	815	687	2509	1809	2063	6607	4582	2645	24	25	66	64	78	83	81	115
Tb927.11.7820	endonuclease/exonuclease/phosphatase, putative	DNA	818	536	590	324	502	1001	1257	245	24	19	16	11	19	13	22	11
Tb927.3.3720	Golgi vesicular membrane trafficking protein, putative	Vesicular.transport	820	788	1400	968	1607	5001	3483	2898	24	28	37	34	61	63	61	126
Tb927.5.3720	hypothetical protein, conserved	ZUnknown	821	849	987	644	816	2277	2104	1074	25	31	26	23	31	29	37	47
Tb927.6.830	hypothetical protein, conserved	ZUnknown	821	859	1194	927	1383	4089	2935	1307	25	31	32	33	52	51	52	57
Tb927.10.7460	hypothetical protein	ZUnknown	822	514	1166	928	745	1925	1383	626	25	19	31	33	28	24	24	27
Tb927.4.720	hypothetical protein, conserved, no clear yeast or human matches	Mito.pathway	822	740	5126	3777	1951	6478	4837	1875	25	27	136	133	74	81	85	82
Tb927.8.5840	hypothetical protein, conserved	ZUnknown	825	372	1936	1457	1735	5409	3999	2298	25	13	51	51	65	68	70	100
Tb927.11.13660	hypothetical protein, conserved	ZUnknown	826	476	1206	872	808	2640	1846	1044	25	17	32	31	30	33	33	45
Tb927.10.1650	hypothetical protein, conserved	ZUnknown	827	515	354	252	674	2089	1558	593	25	19	9	9	25	26	27	26
Tb927.5.4030	LSm7	RNA.processing	828	496	1004	912	935	3197	2678	1550	25	18	27	32	35	40	47	68
Tb927.3.3210	hypothetical protein	ZUnknown	829	538	343	220	275	718	584	237	25	19	9	8	10	9	10	10
Tb927.4.4680	GINS complex subunit PSF3, replication initiation	DNA	829	546	1720	1280	1497	5331	3805	2404	25	20	45	45	56	67	67	105
Tb927.4.5190	hypothetical protein, conserved	ZUnknown	829	793	3490	2713	1606	5178	4010	2132	25	29	92	95	61	65	71	93
Tb927.11.16540	Roadblock/LC7 domain containing protein, putative	ZUnknown	830	685	1126	757	1346	4121	2878	1903	25	25	30	27	51	52	51	83
Tb927.6.5020	CYC7, CYC2-like cyclin	Cell.cycle	831	883	1622	1016	1387	4075	3934	2805	25	32	43	36	52	51	69	122
Tb927.3.1600	Tim10/DDP family zinc finger	Mito.biogenesis	832	647	2165	1574	1255	4099	2933	1851	25	23	57	55	47	51	52	81
Tb927.5.4510	hypothetical protein, conserved	ZUnknown	832	726	1874	1345	1438	4892	3093	2222	25	26	50	47	54	61	54	97
Tb927.10.10640	hypothetical protein, conserved	ZUnknown	833	551	2220	1666	1467	4388	2918	2082	25	20	59	59	55	55	51	91
Tb927.11.14660	hypothetical protein, conserved	ZUnknown	834	737	2325	1821	1654	5313	3707	2402	25	27	61	64	62	67	65	105
Tb927.4.2620	hypothetical protein, conserved	ZUnknown	834	510	2006	1536	1266	3297	2515	1009	25	18	53	54	48	41	44	44
Tb927.8.2180	hypothetical protein, conserved	ZUnknown	834	412	1305	933	906	2775	1846	1029	25	15	34	33	34	35	33	45
Tb927.11.14050	hypothetical protein, conserved	ZUnknown	836	522	1358	1014	984	2717	2117	1284	25	19	36	36	37	34	37	56
Tb927.10.5750	protocatechuate 4,5-dioxygenase-like protein	Enzyme	838	669	1437	940	821	2260	2009	924	25	24	38	33	31	28	35	40
Tb927.11.15260	hypothetical protein	ZUnknown	838	333	1094	742	881	2368	1730	691	25	12	29	26	33	30	30	30
Tb927.7.1930	nucleoside diphosphatase, putative,ectonucleoside triphosphate diphosphohydrolase 5, putative	Enzyme	839	223	735	555	1377	3862	2898	799	25	8	19	20	52	49	51	35
Tb927.7.6780	hypothetical protein	ZUnknown	839	460	593	517	255	578	422	126	25	17	16	18	10	7	7	5
Tb927.9.10060	hypothetical protein, conserved	ZUnknown	842	327	961	680	1051	3594	2613	1180	25	12	25	24	40	45	46	51
Tb927.11.13620	rhodanese-like domain containing protein, putative	ZUnknown	843	681	1172	802	857	2382	2136	1082	25	25	31	28	32	30	38	47
Tb927.6.2590	hypothetical protein, conserved	ZUnknown	843	638	1956	1354	1436	5062	3829	1901	25	23	52	48	54	64	67	83
Tb927.6.4360	hypothetical protein, conserved	ZUnknown	843	568	1367	1078	1020	3127	2294	1067	25	20	36	38	38	39	40	46
Tb927.4.2330	hypothetical protein, conserved	ZUnknown	844	534	2254	1594	1606	4996	3120	2079	25	19	60	56	61	63	55	91
Tb927.8.2830	hypothetical protein, conserved	ZUnknown	844	296	403	378	363	801	644	218	25	11	11	13	14	10	11	9
Tb927.10.10870	protein kinase MAPKLK1	Protein.kinase	848	333	2047	1371	1443	3944	3132	1203	25	12	54	48	54	50	55	52
Tb927.7.6660	chaperone protein DNAj, putative	Chaperone	849	736	5207	3774	1976	5546	4002	2089	25	27	138	133	74	70	70	91
Tb927.11.12990	hypothetical protein	ZUnknown	855	426	268	245	265	804	637	272	26	15	7	9	10	10	11	12
Tb927.3.3010	hypothetical protein, conserved	ZUnknown	857	668	1938	1354	1959	5972	4443	3545	26	24	51	48	74	75	78	154
Tb927.8.3670	hypothetical protein	ZUnknown	857	485	858	657	971	3193	2247	1318	26	17	23	23	37	40	40	57
Tb927.10.2830	hypothetical protein, conserved	ZUnknown	858	645	2214	1686	1688	5885	4056	2593	26	23	59	59	64	74	71	113
Tb927.7.2380	hypothetical protein, conserved	ZUnknown	859	779	1211	904	745	2358	1893	804	26	28	32	32	28	30	33	35
Tb927.11.15780	hypothetical protein, conserved, no clear yeast or human matches, resemblance to MIC17 not blast-back positive	ZUnknown	862	518	2599	1752	1911	5626	4140	2240	26	19	69	62	72	71	73	98
Tb927.5.2730	hypothetical protein, conserved	ZUnknown	862	1262	1016	695	999	2967	2840	815	26	45	27	24	38	37	50	36
Tb927.3.5560	hypothetical protein, conserved	ZUnknown	863	761	1174	899	1514	5370	3495	2691	26	27	31	32	57	67	62	117
Tb927.4.1730	hypothetical protein, conserved, kinetoplastid-specific	ZUnknown	863	663	1019	728	763	2157	1777	905	26	24	27	26	29	27	31	39
Tb927.5.3690	hypothetical protein, conserved	ZUnknown	864	587	2233	1584	1049	2991	2222	1047	26	21	59	56	40	38	39	46
Tb927.9.7020	hypothetical protein, conserved	Mito.pathway	864	410	1203	877	1138	3680	3002	1553	26	15	32	31	43	46	53	68
Tb927.1.1470	conserved protein, unknown function	ZUnknown	865	493	777	408	335	622	543	98	26	18	21	14	13	8	10	4
Tb927.10.12110	hypothetical protein, conserved	ZUnknown	865	819	1407	1067	1040	3471	2913	1373	26	30	37	38	39	44	51	60
Tb927.10.9940	Predicted membrane protein, putative	ZUnknown	865	483	1201	869	1125	3542	2924	1929	26	17	32	31	42	44	51	84
Tb927.4.780	Phosphatidylinositol N-acetylglucosaminyltransferase subunit Y, putative	ZUnknown	865	859	1569	1092	1336	4094	3179	2035	26	31	41	38	50	51	56	89
Tb927.5.2690	inositol-1(or 4)-monophosphatase 1, putative (IMPase 1)	Signalling	865	1367	2912	2161	2286	7543	5754	2862	26	49	77	76	86	95	101	125
Tb927.7.6840	Centrosomal spindle body, CEP44	Cytoskeleton	865	404	1090	783	742	2345	2146	1133	26	15	29	28	28	29	38	49
Tb927.3.5690	hypothetical protein, conserved	ZUnknown	868	668	254	156	817	2722	1412	596	26	24	7	5	31	34	25	26
Tb927.6.2680	transmembrane protein, putative	ZUnknown	868	753	1612	1249	1517	4175	3042	2242	26	27	43	44	57	52	54	98
Tb927.8.4690	hypothetical protein, conserved, no homologues	ZUnknown	868	420	1490	1119	904	2654	1858	733	26	15	39	39	34	33	33	32
Tb927.9.4920	hypothetical protein, conserved	ZUnknown	869	434	1047	764	891	2708	2031	1319	26	16	28	27	34	34	36	57
Tb927.10.400	hypothetical protein, conserved	ZUnknown	870	693	1447	1099	1475	4488	3792	2189	26	25	38	39	56	56	67	95
Tb927.10.4590	mitochondrial inner membrane signal peptidase, putative	Mito.biogenesis	871	558	1368	1003	975	2693	1864	999	26	20	36	35	37	34	33	44
Tb927.11.13650	cytochrome b5, putative (CYB5)	Mito.e.transport	871	445	2984	2128	1284	3480	2020	653	26	16	79	75	48	44	36	28
Tb927.8.680	KREPA5	Mito.RNA	871	867	1498	1205	1170	3995	3393	1854	26	31	40	42	44	50	60	81
Tb927.10.13770	hypothetical protein, conserved	ZUnknown	874	685	2594	2116	2035	7429	5766	3811	26	25	69	74	77	93	102	166
Tb927.10.4740	nucleolar RNA-binding protein, putative	rRNA.tRNA.process	874	900	1969	2054	1833	6624	4672	3249	26	32	52	72	69	83	82	142
Tb927.8.6010	Heme uptake protein LHR1	Transporter	875	599	5638	3812	2177	6137	3871	1627	26	22	149	134	82	77	68	71
Tb927.5.4490	hypothetical protein, conserved	ZUnknown	876	820	1172	1002	1038	3330	2868	1869	26	30	31	35	39	42	51	81
Tb927.9.15080	hypothetical protein, conserved	ZUnknown	876	483	1565	1046	1156	3635	2891	1404	26	17	41	37	44	46	51	61
Tb927.4.1470	Domain of unknown function (DUF4379), putative	ZUnknown	879	597	1682	1421	1847	5910	4238	2985	26	22	44	50	70	74	75	130
Tb927.9.12440	hypothetical protein, conserved	ZUnknown	881	787	817	581	998	3033	2616	1725	26	28	22	20	38	38	46	75
Tb927.7.4350	hypothetical protein, conserved	ZUnknown	882	868	1352	1172	1361	4356	2996	1935	26	31	36	41	51	55	53	84
Tb927.8.3090	hypothetical protein, conserved	Mito.pathway	883	390	3229	2549	1652	5308	3466	2020	26	14	85	90	62	67	61	88
Tb927.7.310	Thioredoxin domain, also matches human prostaglandin E synthetase	Enzyme	884	461	2911	2023	3208	8500	4538	1390	26	17	77	71	121	107	80	61
Tb927.11.16520	hypothetical protein, conserved	ZUnknown	885	622	931	704	1029	3016	2471	1459	26	22	25	25	39	38	44	64
Tb927.7.4680	hypothetical protein, conserved	ZUnknown	885	494	1801	1228	1236	4085	2488	1631	26	18	48	43	47	51	44	71
Tb927.11.10410	Cornichon protein, putative	ZUnknown	886	742	949	632	876	2537	2147	969	26	27	25	22	33	32	38	42
Tb927.10.14290	hypothetical protein	ZUnknown	889	340	201	181	212	458	356	127	27	12	5	6	8	6	6	6
Tb927.8.6680	adaptin complex AP3 sigma subunit	Vesicular.transport	891	648	1634	1052	1075	2769	2238	1372	27	23	43	37	41	35	39	60
Tb927.6.2180	Mitochondrial SSU-associated	Mito.pathway	892	646	1545	934	833	2453	1941	852	27	23	41	33	31	31	34	37
Tb927.7.6550	hypothetical protein, conserved	ZUnknown	892	694	422	305	1022	3434	3943	1825	27	25	11	11	39	43	69	79
Tb927.1.2985	ER protein Pkr1, putative	ZUnknown	893	347	1594	1239	1698	5452	3827	2680	27	13	42	44	64	68	67	117
Tb927.11.16720	CYC6,mitotic cyclin	Cell.cycle	893	625	583	245	542	1242	1180	229	27	23	15	9	20	16	21	10
Tb927.7.3650	protein kinase, putative	Protein.kinase	893	638	647	329	503	928	845	236	27	23	17	12	19	12	15	10
Tb927.11.2190	Domain of unknown function (DUF543), putative	ZUnknown	894	767	1708	1043	1221	3759	2683	1463	27	28	45	37	46	47	47	64
Tb927.11.10220	hypothetical protein, conserved	ZUnknown	895	479	1544	1174	1090	3221	2119	977	27	17	41	41	41	40	37	43
Tb927.11.9500	hypothetical protein, conserved	ZUnknown	896	594	1436	1026	1278	3976	2791	1521	27	21	38	36	48	50	49	66
Tb927.11.16950	hypothetical protein, conserved	ZUnknown	898	387	2142	1713	1475	4542	3588	1792	27	14	57	60	56	57	63	78
Tb927.4.4080	C-5 sterol desaturase, putative	Sterols	898	596	3632	2799	2097	6018	4632	2136	27	21	96	98	79	76	82	93
Tb927.3.4400	BBP41	Cytoskeleton	899	528	865	510	1036	3171	2768	1383	27	19	23	18	39	40	49	60
Tb927.5.2390	hypothetical protein, conserved	ZUnknown	899	1275	1153	696	1056	2467	1781	596	27	46	30	24	40	31	31	26
Tb927.11.9390	lipoate-protein ligase, putative,lipoyltransferase, putative	Mito.pathway	900	588	1530	1142	881	2140	1478	441	27	21	40	40	33	27	26	19
Tb927.11.430	hypothetical protein, conserved	ZUnknown	901	769	1254	783	990	2472	1983	1103	27	28	33	28	37	31	35	48
Tb927.4.970	hypothetical protein, conserved, no clear yeast or human matches	ZUnknown	902	573	1487	1056	809	2202	1840	916	27	21	39	37	30	28	32	40
Tb927.8.1650	protein associated with differentiation 4, PAD4	Transporter	906	520	1225	698	1461	4199	3327	925	27	19	32	25	55	53	59	40
Tb927.11.5390	Tim8-13	Mito.biogenesis	907	839	1891	1685	1369	5267	3526	1207	27	30	50	59	52	66	62	53
Tb927.3.3480	U2 small nuclear ribonucleoprotein B, putative (RBP36 U2SNRNPB, U2B''	RNA.processing	907	583	861	699	599	1574	999	265	27	21	23	25	23	20	18	12
Tb927.3.4830	hypothetical protein	ZUnknown	908	423	744	563	1252	3083	1971	572	27	15	20	20	47	39	35	25
Tb927.7.2040	hypothetical protein, conserved	ZUnknown	908	656	1072	774	1352	4265	3394	1425	27	24	28	27	51	54	60	62
Tb927.3.1910	hypothetical protein, conserved, histone RNA binding domain 259-326	RNA.binding	909	560	408	253	366	548	584	144	27	20	11	9	14	7	10	6
Tb927.1.3550	hypothetical protein	ZUnknown	910	686	339	134	367	744	937	383	27	25	9	5	14	9	17	17
Tb927.5.1170	hypothetical protein, conserved	ZUnknown	911	781	1347	924	1321	4204	3702	2259	27	28	36	33	50	53	65	98
Tb927.4.3050	hypothetical protein, has a prim pol domain	ZUnknown	912	483	570	458	446	1157	874	283	27	17	15	16	17	15	15	12
Tb927.3.1750	rev7, putative,mitotic spindle checkpoint component, Mad2-like HORMA domain	Cell.cycle	914	797	1211	885	1452	4723	4178	2143	27	29	32	31	55	59	74	93
Tb927.10.8370	hypothetical protein, conserved	ZUnknown	915	962	2395	1645	1385	4174	3257	1976	27	35	63	58	52	52	57	86
Tb927.5.3580	phosphoglycerate mutase protein, putative	Glucose.glycerol	915	502	1460	1051	826	2156	1645	722	27	18	39	37	31	27	29	31
Tb927.11.5900	hypothetical protein, conserved	ZUnknown	917	620	783	574	577	1540	1457	520	27	22	21	20	22	19	26	23
Tb927.2.1820	protein kinase, putative	Protein.kinase	918	683	957	408	478	877	880	281	27	25	25	14	18	11	15	12
Tb927.11.9320	hypothetical protein, conserved, no domains, no hits	ZUnknown	919	300	1865	1369	1575	4633	3371	1376	27	11	49	48	59	58	59	60
Tb927.6.3060	hypothetical protein, conserved	ZUnknown	919	939	902	680	911	2986	2985	1799	27	34	24	24	34	38	53	78
Tb927.6.4570	hypothetical protein, conserved, no clear yeast or human matches	ZUnknown	919	725	6175	4262	3023	9998	6279	4019	27	26	163	150	114	126	111	175
Tb927.5.1040	hypothetical protein	ZUnknown	920	697	878	633	537	1467	1163	538	27	25	23	22	20	18	20	23
Tb927.1.4710	hypothetical protein, conserved	ZUnknown	922	774	518	400	718	2111	1844	942	28	28	14	14	27	27	32	41
Tb927.5.2810	hypothetical protein, conserved	Mito.pathway	922	352	1366	1048	1055	3311	2772	1199	28	13	36	37	40	42	49	52
Tb927.5.2550	hypothetical protein, conserved	ZUnknown	925	1696	4833	3039	2950	8816	6956	2485	28	61	128	107	111	111	123	108
Tb927.11.11950	cytochrome oxidase assembly protein, putative	Mito.e.transport	927	452	2362	1986	732	1805	1258	417	28	16	62	70	28	23	22	18
Tb927.9.6440	dolichol phosphate-mannose biosynthesis regulatory protein (DPM2), putative	ZUnknown	927	352	427	357	639	2066	1468	871	28	13	11	13	24	26	26	38
Tb927.3.1780	LSm8	RNA.processing	928	870	2393	1845	1587	5219	4241	2419	28	31	63	65	60	66	75	105
Tb927.10.11630	PSP1 C-terminal conserved region, putative	ZUnknown	931	392	382	223	291	555	517	138	28	14	10	8	11	7	9	6
Tb927.9.12870	BET5 homologue, particle for transport from ER to Golgi.	Vesicular.transport	932	694	1537	1189	1513	5371	3909	2338	28	25	41	42	57	67	69	102
Tb927.5.4050	hypothetical protein, conserved	ZUnknown	937	763	1718	1320	1596	5009	3542	2547	28	28	45	46	60	63	62	111
Tb927.3.590	adenosine transporter, putative	Nucleotides	940	779	11035	9747	1759	4616	4149	630	28	28	292	343	66	58	73	27
Tb927.9.7250	hypothetical protein, conserved	ZUnknown	941	943	2418	1878	1178	3500	2737	1548	28	34	64	66	44	44	48	67
Tb927.10.12150	hypothetical protein, conserved	ZUnknown	943	504	687	544	476	1355	1207	471	28	18	18	19	18	17	21	21
Tb927.10.12660	PUF2	RNA.binding	943	481	204	129	176	285	349	38	28	17	5	5	7	4	6	2
Tb927.10.6470	hypothetical protein	ZUnknown	943	702	636	525	447	1049	873	235	28	25	17	18	17	13	15	10
Tb927.3.1250	DNA-directed RNA polymerase subunit, putative, (RPB10)	RNA.synthesis	943	778	1972	1649	1497	4703	3782	2504	28	28	52	58	56	59	67	109
Tb927.11.13590	hypothetical protein, conserved	ZUnknown	944	577	1378	1053	699	1785	1434	427	28	21	36	37	26	22	25	19
Tb927.4.1030	Protein of unknown function (DUF501), putative	ZUnknown	944	566	1319	895	763	1914	1707	594	28	20	35	31	29	24	30	26
Tb927.8.3440	hypothetical protein, conserved	ZUnknown	944	823	824	620	724	2435	2149	1477	28	30	22	22	27	31	38	64
Tb927.10.15510	hypothetical protein, conserved	ZUnknown	946	848	1868	1375	1142	2823	2098	860	28	31	49	48	43	35	37	37
Tb927.10.7950	hypothetical protein	ZUnknown	946	478	1078	755	1042	2758	2050	745	28	17	28	27	39	35	36	32
Tb927.9.3340	hypothetical protein, conserved	ZUnknown	946	657	2444	1873	1490	5039	3202	1698	28	24	65	66	56	63	56	74
Tb927.11.13390	hypothetical protein, conserved	ZUnknown	947	588	1174	898	1286	4173	3534	1320	28	21	31	32	48	52	62	57
Tb927.10.8960	hypothetical protein, conserved	ZUnknown	948	1002	1266	887	751	2426	1893	726	28	36	33	31	28	30	33	32
Tb927.10.15970	sphingomyelin/ceramide phosphorylethanolamine synthase, bifunctional	Lipids	951	233	175	131	186	514	500	183	28	8	5	5	7	6	9	8
Tb927.8.3040	hypothetical protein, conserved	ZUnknown	951	805	1845	1385	1201	3430	2767	1256	28	29	49	49	45	43	49	55
Tb927.7.4720	hypothetical protein	ZUnknown	952	438	1387	984	688	1594	1378	423	28	16	37	35	26	20	24	18
Tb927.11.7440	hypothetical protein, conserved	ZUnknown	953	936	1243	924	960	3154	2281	994	28	34	33	33	36	40	40	43
Tb927.3.3140	hypothetical protein, conserved	ZUnknown	953	876	1671	1402	1595	5482	4168	2329	28	32	44	49	60	69	73	101
Tb927.9.10650	hypothetical protein	ZUnknown	953	663	169	139	1137	3848	2951	590	28	24	4	5	43	48	52	26
Tb927.10.1580	Domain of unknown function (DUF543), putative	ZUnknown	955	900	3791	2815	2179	7140	4880	2999	28	32	100	99	82	90	86	131
Tb927.4.4640	hypothetical protein, conserved	ZUnknown	956	699	1900	1284	1119	3458	2898	1567	29	25	50	45	42	43	51	68
Tb927.8.640	Dpy-30 motif containing protein, putative	ZUnknown	956	828	1262	1015	1326	4447	5280	3578	29	30	33	36	50	56	93	156
Tb927.5.1490	eIF4G1	Translation	959	379	213	140	187	352	327	105	29	14	6	5	7	4	6	5
Tb927.11.11050	hypothetical protein, conserved	ZUnknown	960	258	2157	1768	1833	4822	3539	1185	29	9	57	62	69	61	62	52
Tb927.5.2010	hypothetical protein	ZUnknown	960	456	424	279	345	882	543	186	29	16	11	10	13	11	10	8
Tb927.5.2870	hypothetical protein	ZUnknown	960	339	316	222	219	513	476	132	29	12	8	8	8	6	8	6
Tb927.8.910	hypothetical protein, conserved, Qn domains, PRK14951 domain (DNA polymerase III subunits gamma and tau, E= -3), kinetoplastid specific	ZUnknown	960	791	844	514	767	2274	3032	364	29	29	22	18	29	29	53	16
Tb927.8.4290	Ribosome biogenesis protein Nop16, putative	ZUnknown	961	734	1355	979	757	2217	1977	796	29	26	36	34	29	28	35	35
Tb927.10.12900	Complex 1 protein (LYR family), putative	ZUnknown	962	400	1778	1376	1514	5030	3844	2753	29	14	47	48	57	63	68	120
Tb927.2.3090	hypothetical protein, conserved	ZUnknown	962	791	812	432	706	1573	1313	411	29	29	21	15	27	20	23	18
Tb927.4.3760	hypothetical protein	ZUnknown	962	826	959	638	1063	3255	2242	594	29	30	25	22	40	41	39	26
Tb927.9.3750	hypothetical protein, conserved	ZUnknown	962	897	1935	1377	1851	6342	3909	3256	29	32	51	48	70	80	69	142
Tb927.8.2190	hypothetical protein, conserved	ZUnknown	963	686	2966	2301	1686	5041	3203	2101	29	25	78	81	64	63	56	92
Tb927.8.2010	hypothetical protein, conserved	ZUnknown	965	568	1275	909	991	2692	2329	1064	29	20	34	32	37	34	41	46
Tb927.11.10870	32 kDa ER-associated protein (ERAP32)	Vesicular.transport	968	506	1066	781	688	1730	1254	292	29	18	28	27	26	22	22	13
Tb927.11.13120	PUB domain containing protein, putative	ZUnknown	968	597	2050	1473	1934	6403	4409	3025	29	22	54	52	73	80	78	132
Tb927.6.1420	Uncharacterised protein family (UPF0220), putative	ZUnknown	968	723	605	443	932	2982	2392	1468	29	26	16	16	35	37	42	64
Tb927.5.820	hypothetical protein, conserved	ZUnknown	970	778	1049	899	754	1784	1158	364	29	28	28	32	28	22	20	16
Tb927.3.2970	hypothetical protein, conserved	ZUnknown	971	733	1271	879	1336	3594	2982	1750	29	26	34	31	50	45	53	76
Tb927.10.4020	hypothetical protein, conserved	ZUnknown	975	508	881	758	621	1699	1121	420	29	18	23	27	23	21	20	18
Tb927.10.8380	hypothetical protein, conserved	ZUnknown	975	779	2294	1623	1753	5095	4383	3506	29	28	61	57	66	64	77	153
Tb927.8.4760	KKT20 Kinetochore protein	Cell.cycle	975	754	1297	907	1124	3545	2559	1825	29	27	34	32	42	45	45	79
Tb927.1.1380	serine/threonine protein phosphatase 2A regulatory subunit, putative	Protein.kinase	977	683	793	343	550	1012	892	356	29	25	21	12	21	13	16	16
Tb927.11.12200	hypothetical protein, conserved	ZUnknown	977	807	1499	1158	1280	4083	3201	1835	29	29	40	41	48	51	56	80
Tb927.6.640	kinetoplastid-specific phospho-protein phosphatase, putative	Protein.phosphatase	978	444	294	201	303	498	609	86	29	16	8	7	11	6	11	4
Tb927.10.15580	dynein light chain, putative	Cytoskeleton	981	512	904	682	1098	3588	2814	1653	29	18	24	24	41	45	50	72
Tb927.7.320	RBP8	RNA.binding	981	756	2233	1692	1820	5502	4280	1602	29	27	59	60	69	69	75	70
Tb927.7.3800	hypothetical protein, conserved	ZUnknown	982	694	1977	1385	1215	3800	3143	1826	29	25	52	49	46	48	55	80
Tb927.8.7190	hypothetical protein	ZUnknown	982	793	1051	712	789	2060	1663	361	29	29	28	25	30	26	29	16
Tb927.11.13510	hypothetical protein, conserved	Mito.pathway	983	540	3411	2712	1452	3979	2881	987	29	19	90	95	55	50	51	43
Tb927.11.13610	rhodanese-like domain containing protein, putative	ZUnknown	983	882	2983	2194	827	2757	2714	1191	29	32	79	77	31	35	48	52
Tb927.9.3410	hypothetical protein, conserved	Mito.pathway	983	565	1848	1409	1177	3343	2334	1443	29	20	49	50	44	42	41	63
Tb927.1.1400	Overproducer of inositol protein 10 homolog, putative	ZUnknown	984	933	1516	1217	1175	3654	2640	1331	29	34	40	43	44	46	46	58
Tb927.10.4030	hypothetical protein	ZUnknown	985	425	704	608	553	1398	969	324	29	15	19	21	21	18	17	14
Tb927.7.4010	hypothetical protein, conserved	ZUnknown	985	752	1913	1625	1391	4179	2684	1654	29	27	51	57	52	52	47	72
Tb927.8.2140	hypothetical protein, conserved	ZUnknown	985	749	820	491	622	1655	1638	601	29	27	22	17	23	21	29	26
Tb927.5.750	hypothetical protein, conserved	ZUnknown	986	676	2274	1499	1392	4592	3367	1981	29	24	60	53	52	58	59	86
Tb927.11.8020	hypothetical protein, conserved, no domains, poor Drosophila match	ZUnknown	987	795	1746	1283	1547	5233	4057	2367	29	29	46	45	58	66	71	103
Tb927.7.2200	Tim9	Mito.biogenesis	988	960	1837	1310	1203	3967	2630	1072	29	35	49	46	45	50	46	47
Tb927.10.11900	thioredoxin, putative	Mito.pathway	989	406	1945	1518	1353	4681	3306	1694	30	15	51	53	51	59	58	74
Tb927.10.7470	U2 splicing factor SF3b14 (p14), putative. RBP15	RNA.processing	989	530	1769	1252	1443	5181	3792	2504	30	19	47	44	54	65	67	109
Tb927.10.12550	hypothetical protein, conserved	ZUnknown	990	611	2174	1514	1874	5610	3846	2204	30	22	57	53	71	70	68	96
Tb927.4.3180	hypothetical protein, conserved	ZUnknown	990	890	700	479	644	2129	2214	1386	30	32	19	17	24	27	39	60
Tb927.9.10660	hypothetical protein, conserved	ZUnknown	990	905	1728	1411	1379	4094	3545	2128	30	33	46	50	52	51	62	93
Tb927.8.7130	hypothetical protein, conserved	ZUnknown	991	711	734	515	848	2414	2282	1298	30	26	19	18	32	30	40	57
Tb927.7.5770	PK53 protein kinase	Protein.kinase	993	842	769	411	863	1786	1604	484	30	30	20	14	33	22	28	21
Tb927.8.6560	SpoU rRNA Methylase family, putative	Mito.pathway	994	400	1498	1198	1222	3034	1738	398	30	14	40	42	46	38	31	17
Tb927.11.1650	hypothetical protein, conserved	ZUnknown	995	472	3195	2388	2021	5929	3717	2021	30	17	84	84	76	74	65	88
Tb927.11.6030	ras-like small GTPase, putative (TbRLP)	Signalling	998	925	1232	840	1259	4560	3838	2709	30	33	33	30	47	57	68	118
Tb927.11.9460	hypothetical protein, conserved	ZUnknown	998	958	1736	1291	1288	3907	3028	1749	30	35	46	45	49	49	53	76
Tb927.8.3270	hypothetical protein	ZUnknown	998	910	2305	1898	2031	6227	4158	2738	30	33	61	67	77	78	73	119
Tb927.11.4810	hypothetical protein, conserved	Mito.pathway	999	943	2120	1684	1477	5028	3686	2346	30	34	56	59	56	63	65	102
Tb927.10.14350	hypothetical protein, conserved	ZUnknown	1000	810	2420	1803	1676	5478	3576	2317	30	29	64	63	63	69	63	101
Tb927.5.4140	ZIP Zinc transporter, putative	Zinc.finger	1000	331	795	592	559	1366	1162	368	30	12	21	21	21	17	20	16
Tb927.10.10420	monothiol glutaredoxin 2	Redox	1001	602	3592	2812	2240	7231	4857	3462	30	22	95	99	84	91	86	151
Tb927.11.12020	hypothetical protein, conserved	ZUnknown	1001	761	1510	1124	1457	4477	3848	2022	30	27	40	40	55	56	68	88
Tb927.10.1820	hypothetical protein, conserved	ZUnknown	1002	682	979	717	731	2269	1836	612	30	25	26	25	28	29	32	27
Tb927.10.5570	hypothetical protein, conserved	ZUnknown	1002	1088	1057	617	876	2514	2511	1459	30	39	28	22	33	32	44	64
Tb927.4.2830	hypothetical protein, conserved	ZUnknown	1002	892	941	678	696	1911	1797	642	30	32	25	24	26	24	32	28
Tb927.10.4970	hypothetical protein, conserved	ZUnknown	1004	1120	2150	1519	1533	4683	3498	2300	30	40	57	53	58	59	62	100
Tb927.10.12190	RAB-interacting protein, putative	Signalling	1005	460	726	509	705	2048	1749	743	30	17	19	18	27	26	31	32
Tb927.11.6850	Optic atrophy 3 protein (OPA3), putative	ZUnknown	1006	578	1362	963	1197	3790	3117	1657	30	21	36	34	45	48	55	72
Tb927.10.11270	RBP23	RNA.binding	1007	1200	2859	1998	1319	3831	2780	1307	30	43	76	70	50	48	49	57
Tb927.1.650	conserved protein, unknown function	ZUnknown	1008	994	1316	1005	1127	3604	2797	1779	30	36	35	35	42	45	49	77
Tb927.11.9830	Mitchondrial LSU ribosomal protein	Mito.translation	1011	817	2006	1656	1416	4607	3489	2135	30	29	53	58	53	58	61	93
Tb927.11.320	Potential LC8 homologue (dynein light chain associated to multiple functions in other species such as flagellum beating and formation)	Cytoskeleton	1012	1037	1502	1280	1297	4663	3244	1858	30	37	40	45	49	59	57	81
Tb927.7.2690	hypothetical protein, conserved	Mito.pathway	1014	986	1628	1355	1371	4709	3356	2049	30	36	43	48	52	59	59	89
Tb927.1.1580	cytochrome c oxidase assembly factor, SCO1/2, putative	Mito.e.transport	1015	1112	3501	2456	1326	4105	3389	1589	30	40	93	86	50	52	60	69
Tb927.10.14110	DIP13	Cytoskeleton	1018	866	1184	1055	1368	4781	3791	1950	30	31	31	37	52	60	67	85
Tb927.8.7560	CorA-like Mg2+ transporter protein, putative	ZUnknown	1018	384	648	538	440	1309	675	204	30	14	17	19	17	16	12	9
Tb927.11.7430	hypothetical protein, conserved	ZUnknown	1019	1025	1208	841	1229	3595	2689	1600	30	37	32	30	46	45	47	70
Tb927.2.2830	hypothetical protein, conserved	ZUnknown	1019	843	1385	750	1007	2419	1773	1176	30	30	37	26	38	30	31	51
Tb927.5.2020	hypothetical protein, conserved	ZUnknown	1019	229	409	377	433	1116	602	230	30	8	11	13	16	14	11	10
Tb927.8.6400	hypothetical protein, conserved	ZUnknown	1021	620	1721	1280	1422	4646	2943	1208	30	22	45	45	54	58	52	53
Tb927.11.13800	hypothetical protein, conserved	ZUnknown	1023	803	2595	1890	1815	5518	3884	2700	31	29	69	66	68	69	68	118
Tb927.4.1370	hypothetical protein, conserved	ZUnknown	1026	860	2176	1766	1704	6020	4540	2787	31	31	58	62	64	76	80	121
Tb927.5.1080	RBP22	RNA.binding	1026	850	1312	930	687	1561	1515	473	31	31	35	33	26	20	27	21
Tb927.5.2350	glycosyltransferase (GlcNAc), putative	Glycans	1026	1743	1326	826	1379	3595	3732	1347	31	63	35	29	52	45	66	59
Tb927.8.5960	hypothetical protein, conserved	ZUnknown	1028	775	1094	775	959	3167	2142	798	31	28	29	27	36	40	38	35
Tb927.6.3270	hypothetical protein, conserved	ZUnknown	1029	907	1519	1277	1096	3896	2791	1523	31	33	40	45	41	49	49	66
Tb927.8.2500	ribosomal RNA methyltransferase, putative	rRNA.tRNA.process	1029	410	1957	1426	1461	3859	3027	1537	31	15	52	50	55	48	53	67
Tb927.8.6540	TFIIH basal transcription factor subunit (p44)	RNA.synthesis	1030	262	1287	974	1771	5251	3376	827	31	9	34	34	67	66	59	36
Tb927.1.1170	DNA-directed RNA polymerase subunit RBP12, putative (RBP12)	RNA.synthesis	1031	987	1592	1416	1553	4939	3641	2336	31	36	42	50	59	62	64	102
Tb927.10.320	hypothetical protein, conserved	ZUnknown	1033	661	921	654	1078	3664	3170	1901	31	24	24	23	41	46	56	83
Tb927.11.8040	Mitochondrial LSU-associated	Mito.pathway	1034	819	2445	1744	1417	4520	3599	2065	31	30	65	61	53	57	63	90
Tb927.9.8290	Mitchondrial LSU ribosomal protein	Mito.translation	1034	699	1242	883	812	2656	2231	1130	31	25	33	31	31	33	39	49
Tb927.1.5160	hypothetical protein	ZUnknown	1035	534	17	8	34	82	138	29	31	19	0	0	1	1	2	1
Tb927.9.12690	prenyl protein specific carboxyl methyltransferase	Prenylation	1035	1077	833	575	769	2131	1907	1009	31	39	22	20	29	27	34	44
Tb927.7.1900	CRK7 cdc2- like protein kinase	Protein.kinase	1036	635	863	632	996	2716	2333	1215	31	23	23	22	38	34	41	53
Tb927.10.7210	hypothetical protein, conserved	ZUnknown	1038	1030	2536	1809	1630	5193	3713	1986	31	37	67	64	61	65	65	87
Tb927.8.5190	hypothetical protein, conserved	ZUnknown	1038	652	990	667	940	2386	2044	659	31	24	26	23	35	30	36	29
Tb927.11.5600	ATOM14 - POMP14	Mito.biogenesis	1039	939	3182	2402	1391	4650	3524	1477	31	34	84	84	52	58	62	64
Tb927.9.6570	hypothetical protein, conserved	ZUnknown	1039	549	242	168	246	492	399	122	31	20	6	6	9	6	7	5
Tb927.10.4330	2-oxoisovalerate dehydrogenase beta subunit, mitochondrial precursor, putative	Lipids	1040	621	5113	3689	2799	7600	4776	1203	31	22	135	130	105	95	84	52
Tb927.4.2150	hypothetical protein, conserved	ZUnknown	1040	612	1629	1149	1315	4139	2884	1968	31	22	43	40	50	52	51	86
Tb927.10.5050	Mitochondrial ATP synthase epsilon subunit, putative	Mito.pathway	1041	938	6869	5835	3291	11886	8071	3467	31	34	182	205	124	149	142	151
Tb927.3.3630	EF-TS Mitochondrial elongation factor ts	Mito.translation	1041	581	5048	3867	1418	4240	2925	776	31	21	133	136	53	53	52	34
Tb927.10.14370	hypothetical protein, conserved	ZUnknown	1043	710	1610	1279	961	3225	2379	1110	31	26	43	45	36	41	42	48
Tb927.10.10030	hypothetical protein, conserved	ZUnknown	1045	1120	1925	1272	1597	4824	3133	1910	31	40	51	45	60	61	55	83
Tb927.11.3640	Mitchondrial LSU ribosomal protein	Mito.translation	1048	699	1116	810	835	2439	1916	767	31	25	30	28	31	31	34	33
Tb927.8.5180	LSm2	RNA.processing	1049	660	1984	1565	1487	4244	3452	1798	31	24	52	55	56	53	61	78
Tb927.9.7100	hypothetical protein, conserved	ZUnknown	1049	877	1286	1003	1386	4521	3255	1479	31	32	34	35	52	57	57	64
Tb927.10.16050	hypothetical protein, conserved	ZUnknown	1052	868	2272	1549	1875	5275	2735	1556	31	31	60	54	71	66	48	68
Tb927.11.6700	hypothetical protein, conserved	ZUnknown	1052	514	3037	2265	2170	6969	4607	2632	31	19	80	80	82	88	81	115
Tb927.5.3530	hypothetical protein, conserved	ZUnknown	1053	708	958	577	785	2420	2119	1132	31	26	25	20	30	30	37	49
Tb927.11.4070	hypothetical protein	ZUnknown	1055	863	82	37	632	2035	2060	1467	31	31	2	1	24	26	36	64
Tb927.9.6910	hypothetical protein, conserved	Mito.pathway	1057	938	2095	1580	1477	5017	3535	2388	32	34	55	56	56	63	62	104
Tb927.2.5140	hypothetical protein, conserved	ZUnknown	1059	952	1846	1413	1206	4387	3748	2030	32	34	49	50	45	55	66	88
Tb927.4.4780	hypothetical protein	ZUnknown	1059	648	341	268	649	1540	1138	403	32	23	9	9	24	19	20	18
Tb927.5.4370	hypothetical protein, conserved	ZUnknown	1059	630	2029	1545	2298	7411	6047	5081	32	23	54	54	87	93	106	221
Tb927.8.5390	CRK4 cdc2- like protein kinase	Cell.cycle	1059	348	398	382	331	816	707	228	32	13	11	13	12	10	12	10
Tb927.3.2350	hypothetical protein, conserved	ZUnknown	1060	434	1977	1431	1764	5462	3383	2367	32	16	52	50	66	69	60	103
Tb927.5.1220	hypothetical protein, conserved	ZUnknown	1060	985	2208	1640	1698	5751	3733	2549	32	36	58	58	64	72	66	111
Tb927.11.14710	rRNA processing, putative	ZUnknown	1063	917	1165	919	767	2652	2296	1105	32	33	31	32	29	33	40	48
Tb927.11.9040	conserved protein	ZUnknown	1064	1083	2863	2151	1821	5663	3675	2555	32	39	76	76	69	71	65	111
Tb927.10.16070	eIF4E2	Translation	1065	1143	1696	1293	984	2609	1820	650	32	41	45	45	37	33	32	28
Tb927.11.10830	hypothetical protein	ZUnknown	1065	609	1117	918	543	1338	868	266	32	22	30	32	20	17	15	12
Tb927.6.570	conserved protein	ZUnknown	1065	1023	2211	1658	1917	6244	4189	2688	32	37	58	58	72	78	74	117
Tb927.8.3370	Ran guanine nucleotide release factor homologue	Nuclear.transport	1065	986	819	624	918	2966	2891	1778	32	36	22	22	35	37	51	77
Tb927.11.6470	hypothetical protein, conserved	Mito.pathway	1066	920	2043	1592	2006	5714	3880	2687	32	33	54	56	76	72	68	117
Tb927.10.13910	hypothetical protein, conserved	ZUnknown	1068	566	4427	3211	2323	7007	4454	1577	32	20	117	113	88	88	78	69
Tb927.5.3040	Cytochrome c Oxidase complex, MIX protein	Mito.e.transport	1069	790	3544	2467	1340	3562	2386	685	32	28	94	87	51	45	42	30
Tb927.10.15810	Fcf1 pre-rRNA processing, putative	rRNA.tRNA.process	1071	609	2534	1962	1298	3765	2960	1574	32	22	67	69	49	47	52	69
Tb927.7.6230	ADP-ribosylation factor, putative (ARF3)	Vesicular.transport	1071	925	2523	1945	1305	3509	2415	942	32	33	67	68	49	44	43	41
Tb927.8.1430	Mitchondrial SSU ribosomal protein	Mito.translation	1071	995	2791	2170	1511	5094	3844	2231	32	36	74	76	57	64	68	97
Tb927.8.7210	hypothetical protein, conserved	ZUnknown	1071	839	646	438	874	2952	2975	1815	32	30	17	15	33	37	52	79
Tb927.9.11370	hypothetical protein, conserved	ZUnknown	1074	967	1770	1354	1745	5404	3609	2503	32	35	47	48	66	68	64	109
Tb927.8.2400	hypothetical protein, conserved	ZUnknown	1075	746	1689	1180	1108	3293	2651	821	32	27	45	42	42	41	47	36
Tb927.8.1490	SDH succinate dehydrogenase (complex II) subunit, putative	Mito.e.transport	1076	981	3428	2731	1691	4710	3443	1050	32	35	91	96	64	59	61	46
Tb927.2.4700	SDH8 succinate dehydrogenase (complex II) subunit	Mito.e.transport	1077	658	5379	3442	2572	6760	4480	1921	32	24	142	121	97	85	79	84
Tb927.3.2880	Mitochondrial ATP synthase subunit, putative	Mito.pathway	1077	1031	7506	5430	3134	9197	6134	3646	32	37	198	191	118	116	108	159
Tb927.10.2400	hypothetical protein	ZUnknown	1078	436	157	89	327	785	872	227	32	16	4	3	12	10	15	10
Tb927.10.8620	hypothetical protein, conserved	ZUnknown	1078	664	1864	1381	1164	3702	3007	1537	32	24	49	49	44	46	53	67
Tb927.11.15550	NADH-cytochrome b5 reductase, putative (B5R)	Mito.e.transport	1078	815	10345	6815	2283	7109	6118	1608	32	29	273	240	86	89	108	70
Tb927.8.1040	protein phosphatase inhibitor, putative	ZUnknown	1078	962	2357	1718	1942	5850	4547	2777	32	35	62	60	73	73	80	121
Tb927.11.16420	Methyltransferase TYW3, putative	ZUnknown	1081	465	876	684	565	1485	1102	221	32	17	23	24	21	19	19	10
Tb927.4.1880	hypothetical protein, conserved	ZUnknown	1081	903	1169	510	1092	2322	2193	1027	32	33	31	18	41	29	39	45
Tb927.8.3190	hypothetical protein, conserved	ZUnknown	1081	511	1230	1006	1020	2394	1852	599	32	18	33	35	38	30	33	26
Tb927.11.13310	hypothetical protein, conserved, spectrin repeats	ZUnknown	1082	865	1330	1194	771	1784	1389	360	32	31	35	42	29	22	24	16
Tb927.11.11970	hypothetical protein	ZUnknown	1083	618	851	616	735	1864	1525	410	32	22	22	22	28	23	27	18
Tb927.11.16820	hypothetical protein, conserved	ZUnknown	1085	617	1186	584	823	1544	1263	340	32	22	31	21	31	19	22	15
Tb927.4.3830	hypothetical protein, conserved	ZUnknown	1085	604	1574	1343	1885	6791	5690	3600	32	22	42	47	71	85	100	157
Tb927.1.3810	hypothetical protein, conserved	ZUnknown	1087	936	2705	1964	2079	7053	4876	3486	32	34	72	69	78	89	86	152
Tb927.4.1070	Mitchondrial LSU ribosomal protein L13, putative	Mito.translation	1087	892	2222	1455	1703	4836	3825	2410	32	32	59	51	64	61	67	105
Tb927.9.2110	hypothetical protein, conserved	ZUnknown	1087	528	3694	3103	2559	8500	5321	2940	32	19	98	109	96	107	94	128
Tb927.1.3280	septum formation protein MAF homologue, putative	ZUnknown	1088	414	1535	1047	1230	3234	2534	1297	32	15	41	37	46	41	45	56
Tb927.7.6470	O-sialoglycoprotein endopeptidase, putative	Protease	1088	403	1890	1353	1720	4571	3234	1508	32	15	50	48	65	57	57	66
Tb927.10.5090	Enriched in surface-labeled proteome protein 18 (ESP18)	ZUnknown	1089	778	1788	906	1541	3999	3111	1796	32	28	47	32	58	50	55	78
Tb927.11.1950	hypothetical protein, conserved	Mito.pathway	1089	1051	1556	1118	1032	3629	2909	1759	32	38	41	39	39	46	51	77
Tb927.3.5270	DNA-directed RNA polymerases II subunit, putative (RPB4)	RNA.synthesis	1090	1062	2004	1427	1470	4547	3275	1992	33	38	53	50	55	57	58	87
Tb927.8.8360	GRESAG 4, putative receptor-type adenylate cyclase	GRESAG	1090	458	86	72	115	239	248	80	33	17	2	3	4	3	4	3
Tb927.3.4410	pre-RNA processing PIH1/Nop17, putative	ZUnknown	1092	554	2012	1466	1866	6099	4511	2785	33	20	53	52	70	77	79	121
Tb927.10.11230	Ras-induced vulval development antagonist, putative	ZUnknown	1093	638	1574	1187	1068	2958	2355	1054	33	23	42	42	40	37	41	46
Tb927.10.2070	hypothetical protein, conserved	ZUnknown	1093	952	2725	1999	1907	6107	5088	2750	33	34	72	70	72	77	90	120
Tb927.11.2980	hypothetical protein, conserved	ZUnknown	1093	671	1359	961	905	2529	1957	841	33	24	36	34	34	32	34	37
Tb927.11.2900	HIT zinc finger, putative	ZUnknown	1094	942	1694	1383	1470	4666	3928	2294	33	34	45	49	55	59	69	100
Tb927.2.2340	Glycerophosphoryl diester phosphodiesterase family, putative	ZUnknown	1095	696	340	174	177	370	383	64	33	25	9	6	7	5	7	3
Tb927.7.3580	NEK11 protein kinase	Protein.kinase	1097	740	656	354	475	842	728	101	33	27	17	12	18	11	13	4
Tb927.11.12360	ankyrin repeat protein, putative	Cytoskeleton	1099	811	1361	1009	1425	4705	3932	2591	33	29	36	35	54	59	69	113
Tb927.9.2910	histone acetyltransferase subunit NuA4, putative	ZUnknown	1100	865	1552	1172	1114	3324	2666	1279	33	31	41	41	42	42	47	56
Tb927.8.550	peptide methionine sulfoxide reductase, putative	Protease	1101	866	3513	2658	2395	7063	4804	2840	33	31	93	94	90	89	85	124
Tb927.8.6280	Putative cyclophilin, copurified with splicing complexes	RNA.processing	1102	783	1550	1128	1314	3858	3142	1836	33	28	41	40	50	48	55	80
Tb927.10.1690	nucleotide binding protein, putative (NBP 1)	Enzyme	1103	698	4108	3175	2496	7221	4700	2590	33	25	109	112	94	91	83	113
Tb927.3.2650	cytochrome c oxidase copper chaperone, putative	Mito.e.transport	1103	823	2466	1821	1353	4909	3453	2478	33	30	65	64	51	62	61	108
Tb927.7.2530	N-acetyltransferase, putative	Enzyme	1103	801	1190	892	844	2210	2000	697	33	29	31	31	32	28	35	30
Tb927.8.6340	CYC10, CYC2-like cyclin	Cell.cycle	1103	764	571	278	608	1496	1512	353	33	28	15	10	23	19	27	15
Tb927.11.11130	hypothetical protein, conserved	ZUnknown	1104	996	2434	1832	1360	4329	3251	1775	33	36	64	64	51	54	57	77
Tb927.11.1440	hypothetical protein, conserved	ZUnknown	1105	1019	1500	1034	1110	3394	2563	1739	33	37	40	36	42	43	45	76
Tb927.7.2740	hypothetical protein, conserved	ZUnknown	1105	950	3019	2254	2073	6528	4550	2685	33	34	80	79	78	82	80	117
Tb927.4.1360	Aldose-1-epimerase, putative	Glucose.glycerol	1106	470	6712	5355	2387	7022	4148	1255	33	17	177	188	90	88	73	55
Tb927.3.1480	hypothetical protein, conserved	ZUnknown	1107	674	16	4	29	80	208	42	33	24	0	0	1	1	4	2
Tb927.3.2940	hypothetical protein, conserved, no clear yeast or human matches	ZUnknown	1107	943	1046	764	1071	3035	2749	1580	33	34	28	27	40	38	48	69
Tb927.8.3640	JAB1/Mov34/MPN/PAD-1 ubiquitin protease, putative	ZUnknown	1107	901	2115	1622	2219	5971	4507	2018	33	32	56	57	84	75	79	88
Tb927.4.4090	hypothetical protein, conserved	ZUnknown	1108	665	1152	882	1335	4110	3440	1869	33	24	30	31	50	52	61	81
Tb927.10.9270	emp24/gp25L/p24 family/GOLD, putative	Vesicular.transport	1109	787	1872	1255	994	2819	2837	1046	33	28	49	44	37	35	50	46
Tb927.11.6520	hypothetical protein, conserved	ZUnknown	1109	643	1239	794	1302	4095	3019	1334	33	23	33	28	49	51	53	58
Tb927.10.1540	ZC3H30	RNA.binding	1113	465	445	318	339	522	454	102	33	17	12	11	13	7	8	4
Tb927.10.8220	hypothetical protein, conserved	ZUnknown	1114	790	2000	1252	1506	4247	3107	2122	33	28	53	44	57	53	55	92
Tb927.3.4480	hypothetical protein, conserved	ZUnknown	1114	793	2414	1774	1642	5302	3882	2004	33	29	64	62	62	67	68	87
Tb927.10.4550	hypothetical protein, conserved	Mito.pathway	1115	1042	1605	1320	1444	4611	3702	2255	33	38	42	46	54	58	65	98
Tb927.3.2450	hypothetical protein, conserved	ZUnknown	1117	856	1045	667	1127	2824	2392	767	33	31	28	23	42	35	42	33
Tb927.10.6280	N-terminal glutamine amidase, putative	ZUnknown	1118	757	1874	1281	1414	4310	3380	1355	33	27	50	45	53	54	60	59
Tb927.10.11120	hypothetical protein, conserved	ZUnknown	1119	441	2074	1669	1563	4961	4088	2413	33	16	55	59	59	62	72	105
Tb927.10.7910	hypothetical protein, conserved	Mito.pathway	1119	561	3015	2258	2378	7761	5621	3577	33	20	80	79	90	97	99	156
Tb927.11.10980	Got1/Sft2-like family, putative	ZUnknown	1119	426	833	638	1112	3570	2602	1531	33	15	22	22	42	45	46	67
Tb927.6.1860	hypothetical protein, conserved, prokaryotic ribosome recycling factor domain, no Sc match	Mito.pathway	1119	666	2544	2006	1254	4108	3098	1115	33	24	67	71	47	52	55	49
Tb927.10.9510	hypothetical protein	ZUnknown	1121	665	248	195	523	1688	1393	970	33	24	7	7	20	21	25	42
Tb927.11.11180	hypothetical protein, conserved	ZUnknown	1121	599	849	655	741	1884	1652	571	33	22	22	23	28	24	29	25
Tb927.11.5890	Domain of unknown function (DUF4505), putative	ZUnknown	1122	1042	1210	855	1470	4736	3999	2702	33	38	32	30	55	59	70	118
Tb927.11.6930	Sec20, putative	ZUnknown	1123	974	1266	923	960	2886	2420	1046	34	35	33	32	36	36	43	46
Tb927.6.2620	hypothetical protein, conserved	ZUnknown	1123	851	1071	845	1084	3038	2315	1337	34	31	28	30	41	38	41	58
Tb927.7.2060	DNA repair protein ERCC1, putative	DNA	1124	562	1027	808	1010	3008	2640	1367	34	20	27	28	38	38	46	60
Tb927.10.130	hypothetical protein	ZUnknown	1125	756	2080	1254	1382	4273	3273	1561	34	27	55	44	52	54	58	68
Tb927.7.340	Alpha/beta hydrolase family, putative	ZUnknown	1125	530	1368	1078	911	2327	1577	574	34	19	36	38	34	29	28	25
Tb927.7.5270	hypothetical protein, conserved	ZUnknown	1125	591	1400	1045	946	2262	2070	847	34	21	37	37	36	28	36	37
Tb927.9.1920	hypothetical protein, conserved	ZUnknown	1126	987	4517	3073	1892	5531	3892	1731	34	36	119	108	71	69	69	75
Tb927.4.700	hypothetical protein, conserved	ZUnknown	1127	1095	1742	1270	1777	5345	4493	3389	34	39	46	45	67	67	79	148
Tb927.9.3840	hypothetical protein, conserved	ZUnknown	1128	648	1907	1529	1620	4915	3944	2653	34	23	50	54	61	62	69	116
Tb927.10.11430	hypothetical protein, conserved	ZUnknown	1130	620	567	434	449	1102	857	283	34	22	15	15	17	14	15	12
Tb927.10.1940	serine/threonine-protein kinase, putative	Protein.kinase	1131	397	1797	1340	1147	3337	2972	1675	34	14	48	47	43	42	52	73
Tb927.11.5170	ubiquitin activating enzyme, putative	Ubiquitin.proteasome	1131	677	734	544	640	1563	1106	324	34	24	19	19	24	20	19	14
Tb927.2.4650	hypothetical protein, conserved	ZUnknown	1131	1151	2355	1618	1562	4030	3304	1035	34	41	62	57	59	51	58	45
Tb927.3.5210	hypothetical protein, conserved	ZUnknown	1132	1010	1142	677	1636	4417	3746	2878	34	36	30	24	62	55	66	125
Tb927.11.8450	Amastin surface glycoprotein, putative	ZUnknown	1133	858	1843	1326	965	2528	1845	594	34	31	49	47	36	32	32	26
Tb927.10.1160	NADH-ubiquinone oxidoreductase complex I subunit, putative	Mito.pathway	1135	1401	4379	3475	2913	9422	5830	3430	34	51	116	122	110	118	103	149
Tb927.8.4180	tRNA-specific adenosine deaminase (ADAT2)	rRNA.tRNA.process	1135	984	1529	1131	1227	3931	3303	1950	34	35	40	40	46	49	58	85
Tb927.8.5690	KREPB8	Mito.RNA	1136	435	867	637	841	2118	1784	557	34	16	23	22	32	27	31	24
Tb927.11.970	hypothetical protein, conserved	ZUnknown	1137	1054	2312	1907	1733	6234	4627	2973	34	38	61	67	65	78	81	130
Tb927.5.3190	hypothetical protein, conserved, low homologies, no domains	ZUnknown	1137	1129	1928	1513	1516	4652	3820	2100	34	41	51	53	57	58	67	91
Tb927.5.2650	L-galactonolactone oxidase (GAL/ALO)	Enzyme	1138	1817	3032	1762	2359	6161	4998	1218	34	66	80	62	89	77	88	53
Tb927.10.150	hypothetical protein, conserved	ZUnknown	1139	892	1083	848	1123	3915	3258	1754	34	32	29	30	42	49	57	76
Tb927.10.9320	hypothetical protein, conserved	ZUnknown	1139	1011	827	547	761	2078	2167	1229	34	36	22	19	29	26	38	54
Tb927.11.13930	U3 small nucleolar ribonucleoprotein protein IMP3, putative	rRNA.tRNA.process	1139	1279	2518	1779	1446	4071	3458	1972	34	46	67	63	54	51	61	86
Tb927.11.4250	hypothetical protein, conserved	ZUnknown	1139	910	1116	751	1006	3252	2609	913	34	33	30	26	38	41	46	40
Tb927.4.5210	hypothetical protein, conserved	ZUnknown	1139	1054	1519	1220	1455	5207	3645	2178	34	38	40	43	55	65	64	95
Tb927.8.2290	hypothetical protein, conserved	ZUnknown	1139	1330	3984	3124	2751	8560	4815	2758	34	48	105	110	104	108	85	120
Tb927.8.5060	ARL6, vesicle-associated, needed for full-length flagellum	Vesicular.transport	1139	1012	1818	1485	1363	3624	2789	1165	34	36	48	52	51	46	49	51
Tb927.10.7480	hypothetical protein, conserved	ZUnknown	1140	651	1809	1235	1199	4006	2951	1561	34	23	48	43	45	50	52	68
Tb927.3.820	Mitchondrial LSU ribosomal protein	Mito.translation	1140	820	1648	1134	1199	3707	3288	2083	34	30	44	40	45	47	58	91
Tb927.6.3250	C2H2 type zinc-finger (2 copies), putative	ZUnknown	1142	1133	2757	1997	1148	3320	2609	1391	34	41	73	70	43	42	46	61
Tb927.7.5830	hypothetical protein, conserved	ZUnknown	1142	1078	915	675	1958	6266	5289	3544	34	39	24	24	74	79	93	154
Tb927.9.3000	cytidine deaminase, putative	Nucleotides	1143	742	1770	1227	1184	3485	2692	1204	34	27	47	43	45	44	47	52
Tb927.11.15700	hypothetical protein, conserved	ZUnknown	1145	786	2386	1840	1666	5096	3780	2146	34	28	63	65	63	64	67	93
Tb927.4.4200	hypothetical protein, conserved	ZUnknown	1146	773	1467	1024	1611	5074	4363	2813	34	28	39	36	61	64	77	123
Tb927.9.13530	hypothetical protein, conserved	ZUnknown	1146	705	2080	1481	1468	4783	3825	2370	34	25	55	52	55	60	67	103
Tb927.1.5180	hypothetical protein	ZUnknown	1147	780	4	0	21	50	127	19	34	28	0	0	1	1	2	1
Tb927.11.9740	tRNA intron endonuclease, catalytic C-terminal domain containing protein, putative	ZUnknown	1147	593	1081	820	828	2423	1971	1143	34	21	29	29	31	30	35	50
Tb927.10.4530	hypothetical protein, conserved	ZUnknown	1148	834	1456	990	1369	3786	3048	1353	34	30	38	35	52	48	54	59
Tb927.11.4140	hypothetical protein, conserved	ZUnknown	1149	773	2493	1921	2078	6442	5040	3600	34	28	66	68	78	81	89	157
Tb927.9.1390	CSL zinc finger, putative	ZUnknown	1149	1089	3260	2444	2506	7977	5557	3536	34	39	86	86	94	100	98	154
Tb927.6.220	purine nucleoside transporter NT9	Nucleotides	1150	981	1147	657	715	2040	2209	1167	34	35	30	23	27	26	39	51
Tb927.7.6340	hypothetical protein, conserved, no clear yeast or human matches	ZUnknown	1150	822	1072	511	981	1833	1872	515	34	30	28	18	37	23	33	22
Tb927.8.3960	hypothetical protein, conserved	ZUnknown	1150	382	763	661	449	1161	739	170	34	14	20	23	17	15	13	7
Tb927.10.11990	hypothetical protein, conserved,RNA-binding protein	RNA.binding	1151	1180	3635	2719	1799	5163	4286	2599	34	43	96	96	68	65	75	113
Tb927.10.15200	Predicted coiled-coil domain-containing protein (DUF2360), putative	ZUnknown	1151	665	866	687	904	2427	1552	636	34	24	23	24	34	30	27	28
Tb927.11.3370	hypothetical protein	ZUnknown	1151	939	894	598	908	2748	2377	633	34	34	24	21	34	35	42	28
Tb927.9.8710	hypothetical protein, conserved	ZUnknown	1151	926	1107	737	877	2559	2322	1279	34	33	29	26	33	32	41	56
Tb927.6.1970	nuclear cap binding protein CBC20	Nuclear.transport	1152	629	1899	1432	1256	3787	3457	2126	34	23	50	50	47	48	61	93
Tb927.3.3600	hypothetical protein	ZUnknown	1153	841	1120	713	1949	5014	4688	2909	34	30	30	25	73	63	83	127
Tb927.3.940	Complex 1 protein (LYR family), putative	Mito.pathway	1154	706	3067	2461	1185	3417	2482	699	34	25	81	87	45	43	44	30
Tb927.3.2250	hypothetical protein, conserved	ZUnknown	1156	868	2020	1320	1637	5453	4397	1994	34	31	53	46	62	68	77	87
Tb927.8.2780	RBP10	RNA.binding	1156	522	266	91	53285	145230	59228	21795	34	19	7	3	2008	1824	1043	949
Tb927.1.1750	conserved protein, unknown function	ZUnknown	1158	992	1299	788	1063	2688	2353	580	35	36	34	28	40	34	41	25
Tb927.6.4930	Mitchondrial SSU ribosomal associated, thiosulfate sulfurtransferase	Mito.translation	1160	642	2883	2067	1512	4544	3134	1518	35	23	76	73	57	57	55	66
Tb927.9.6620	hypothetical protein, conserved	Mito.pathway	1160	776	3369	2478	1208	3419	3069	1018	35	28	89	87	46	43	54	44
Tb927.11.10100	hypothetical protein, conserved	ZUnknown	1161	979	2743	2091	1352	4042	2705	906	35	35	73	74	51	51	48	39
Tb927.8.3940	hypothetical protein, conserved	ZUnknown	1161	330	820	763	647	2171	1207	412	35	12	22	27	24	27	21	18
Tb927.6.4620	hypothetical protein, conserved	ZUnknown	1162	969	1560	1149	1384	4511	3359	2734	35	35	41	40	52	57	59	119
Tb927.6.2500	RF-1 domain containing protein, putative	ZUnknown	1163	932	1720	1200	1279	4148	3623	2120	35	34	45	42	48	52	64	92
Tb927.7.2420	GSK3-long glycogen synthase kinase-3 alpha	Glycans	1163	833	358	148	507	820	1008	227	35	30	9	5	19	10	18	10
Tb927.5.3410	Mitchondrial LSU ribosomal protein	Mito.translation	1165	849	2928	1961	1835	5058	3769	2099	35	31	77	69	69	64	66	91
Tb927.9.10250	small nuclear ribonucleoprotein Sm-F	RNA.processing	1165	1141	2150	1575	1610	4704	3208	1604	35	41	57	55	61	59	56	70
Tb927.10.370	calcineurin B subunit, putative	Calcium	1166	999	1361	914	1471	4740	3826	2704	35	36	36	32	55	60	67	118
Tb927.4.5170	60S ribosomal protein L7/L12, putative	Ribosome	1166	790	2107	1528	1807	5731	4234	2520	35	28	56	54	68	72	75	110
Tb927.8.6090	ubiquitin-conjugating enzyme e2, putative	Ubiquitin.proteasome	1166	1145	2423	1558	1725	4712	3125	1228	35	41	64	55	65	59	55	53
Tb927.11.9480	tubulin binding cofactor c, putative	ZUnknown	1167	918	1912	1459	1343	4490	3465	1948	35	33	51	51	51	56	61	85
Tb927.4.550	Zinc knuckle, putative	Zinc.finger	1167	1238	1808	1482	2001	6651	4205	2988	35	45	48	52	75	84	74	130
Tb927.10.9090	Cullin binding, putative	Ubiquitin.proteasome	1169	516	1010	642	1067	2995	2867	1233	35	19	27	23	40	38	50	54
Tb927.5.2470	hypothetical protein, conserved	ZUnknown	1169	2109	2481	1725	3059	8772	7701	3778	35	76	66	61	115	110	136	165
Tb927.6.2510	Flavinator of succinate dehydrogenase, putative	Mito.pathway	1171	1126	3277	2296	1655	5214	3327	1177	35	41	87	81	62	65	59	51
Tb927.11.12080	N-acetyl-D-glucosaminylphosphatidylinositol de-N-acetylase (GPI12)	GPI.anchors	1172	978	1318	927	1191	3846	3627	2104	35	35	35	33	45	48	64	92
Tb927.11.4330	hypothetical protein, conserved, no clear yeast or human matches	Mito.pathway	1172	771	2545	1789	2177	6551	4686	2816	35	28	67	63	82	82	83	123
Tb927.10.11500	conserved protein	ZUnknown	1173	775	1694	1228	882	2252	1582	500	35	28	45	43	33	28	28	22
Tb927.7.7060	Got1/Sft2-like family, putative	ZUnknown	1173	926	3257	2827	1584	4838	3827	1390	35	33	86	99	60	61	67	61
Tb927.10.2360	hypothetical protein, tryp specific	ZUnknown	1174	757	2854	2033	1820	4722	3466	1386	35	27	75	72	69	59	61	60
Tb927.4.1290	hypothetical protein, conserved	ZUnknown	1174	640	1618	1426	1240	3846	2691	1207	35	23	43	50	47	48	47	53
Tb927.11.12160	hypothetical protein, conserved	Mito.pathway	1175	1108	1958	1493	1485	4588	3589	1771	35	40	52	53	56	58	63	77
Tb927.7.4320	mRNA capping enzyme, beta chain, putative	ZUnknown	1176	642	1410	1233	1171	3385	2545	724	35	23	37	43	44	43	45	32
Tb927.1.3010	mRNA processing protein, putative	Mito.RNA	1177	398	1262	867	702	1867	1240	471	35	14	33	30	26	23	22	21
Tb927.3.4170	CRK9AP	Cell.cycle	1178	1071	1673	1327	1709	5296	4690	3403	35	39	44	47	64	67	83	148
Tb927.6.3850	chaperone protein DNAj, putative	Chaperone	1180	969	1352	1011	1220	4085	4075	2465	35	35	36	36	46	51	72	107
Tb927.11.650	hypothetical protein, conserved	ZUnknown	1181	838	2532	2145	2342	8094	5788	3596	35	30	67	75	88	102	102	157
Tb927.10.14450	hypothetical protein, conserved	ZUnknown	1182	876	899	525	1017	2903	2773	1232	35	32	24	18	38	36	49	54
Tb927.3.1720	hypothetical protein, conserved	Mito.pathway	1182	1069	2627	1846	2678	9525	6543	2383	35	39	69	65	101	120	115	104
Tb927.10.10250	EP2 procyclin	Membrane.protein	1183	1038	258100	204089	72773	211846	157676	60159	35	37	6823	7180	2743	2661	2777	2621
Tb927.11.4620	hypothetical protein, conserved	ZUnknown	1184	773	426	247	395	732	673	91	35	28	11	9	15	9	12	4
Tb927.11.5760	hypothetical protein, conserved	ZUnknown	1184	860	2450	1708	1345	4000	3107	1254	35	31	65	60	51	50	55	55
Tb927.6.5140	ribosomal P protein AGP2beta-1, putative	Ribosome	1185	946	2042	1543	1396	4274	3339	1419	35	34	54	54	53	54	59	62
Tb927.10.9560	oxidoreductase, putative	Enzyme	1186	912	3725	2703	2621	8240	5422	3372	35	33	98	95	99	104	95	147
Tb927.10.9990	non-canonical purine NTP pyrophosphatase, RdgB/HAM1 family, putative	ZUnknown	1186	893	2606	1725	1706	4979	3898	1987	35	32	69	61	64	63	69	87
Tb927.10.10080	hypothetical protein, conserved	ZUnknown	1187	1233	1694	1073	1384	3942	2888	1300	35	44	45	38	52	50	51	57
Tb927.11.4790	hypothetical protein	ZUnknown	1187	840	1947	1247	1633	4974	3334	2128	35	30	51	44	62	62	59	93
Tb927.8.6460	kinase binding protein CGI-121, putative	ZUnknown	1189	1066	2214	1565	1966	6226	4920	2868	35	38	59	55	74	78	87	125
Tb927.1.2770	hypothetical protein, conserved	ZUnknown	1191	542	1316	994	1250	3466	2476	730	36	20	35	35	47	44	44	32
Tb927.9.11040	mitochondrial carrier protein, MCP3	Mito.transport	1191	1133	1962	1413	1575	4384	3699	2340	36	41	52	50	59	55	65	102
Tb927.9.2420	hypothetical protein, conserved	ZUnknown	1191	909	2701	1990	1837	5426	3746	1293	36	33	71	70	69	68	66	56
Tb927.10.12420	predicted S. cerevisiae Got1 homologue, predicted to be involved in ER-Golgi transport	Vesicular.transport	1193	1168	1524	1345	1994	7320	5105	3327	36	42	40	47	75	92	90	145
Tb927.10.8090	hypothetical protein, conserved	ZUnknown	1194	522	2884	2156	2146	6454	4581	2517	36	19	76	76	81	81	81	110
Tb927.10.8680	hypothetical protein, conserved	ZUnknown	1194	707	1091	649	781	1799	1438	271	36	25	29	23	29	23	25	12
Tb927.3.2920	hypothetical protein, conserved	ZUnknown	1194	1195	1409	932	1398	4243	4240	2726	36	43	37	33	53	53	75	119
Tb927.10.14640	Rtf2 RING-finger, putative	ZUnknown	1195	947	2007	1352	1394	4210	3515	2306	36	34	53	48	53	53	62	100
Tb927.11.12030	hypothetical protein, conserved	ZUnknown	1195	1094	1831	1302	864	2406	1831	787	36	39	48	46	33	30	32	34
Tb927.2.4680	hypothetical protein, conserved	ZUnknown	1195	755	962	667	830	2082	1396	386	36	27	25	23	31	26	25	17
Tb927.6.4050	ZC3H14	RNA.binding	1196	853	1623	1034	1470	4111	4415	2103	36	31	43	36	55	52	78	92
Tb927.7.1390	RBSR2	RNA.processing	1197	1145	1430	1066	1571	4814	3616	1686	36	41	38	38	59	60	64	73
Tb927.8.3400	palmitoyl acyltransferase 12, putative	Lipids	1197	835	1622	1232	803	2000	1474	469	36	30	43	43	30	25	26	20
Tb927.3.2850	Got1/Sft2-like family, putative	ZUnknown	1198	966	1750	1284	1471	4244	3476	1863	36	35	46	45	55	53	61	81
Tb927.5.510	SDH10 succinate dehydrogenase (complex II) subunit	Mito.e.transport	1198	1116	6450	4492	3444	10258	6132	2824	36	40	171	158	130	129	108	123
Tb927.7.5130	hypothetical protein, conserved	ZUnknown	1198	822	2479	1926	1224	3214	2151	772	36	30	66	68	46	40	38	34
Tb927.11.13480	hypothetical protein, conserved	ZUnknown	1201	736	911	679	794	2096	1644	552	36	27	24	24	30	26	29	24
Tb927.11.2350	hypothetical protein, conserved	ZUnknown	1203	1106	2046	1634	2331	7442	5110	2551	36	40	54	57	88	93	90	111
Tb927.11.15360	hypothetical protein, conserved, 3TM domains	ZUnknown	1204	1019	3362	2422	2223	6367	4725	2926	36	37	89	85	84	80	83	127
Tb927.3.1090	small nuclear RNA (snRNA) U1-binding protein (TbU1-24K)	RNA.processing	1204	869	1312	903	811	2009	1761	564	36	31	35	32	31	25	31	25
Tb927.4.470	snoRNP protein GAR1, putative	rRNA.tRNA.process	1204	1008	2006	1945	935	2364	1301	294	36	36	53	68	35	30	23	13
Tb927.8.3390	hypothetical protein, conserved	ZUnknown	1204	1156	604	426	729	2338	2613	1706	36	42	16	15	27	29	46	74
Tb927.10.7390	U2 splicing factor, putatiive SF3b(SAP)14b	RNA.processing	1205	986	1973	1613	1606	5075	3933	2497	36	36	52	57	61	64	69	109
Tb927.5.540	hypothetical protein	ZUnknown	1205	944	774	558	594	1600	1058	318	36	34	20	20	22	20	19	14
Tb927.10.7720	hypothetical protein, conserved	ZUnknown	1208	612	2017	1513	1714	5108	3337	1044	36	22	53	53	65	64	59	45
Tb927.4.3080	Uncharacterised ACR, YggU family COG1872, putative	ZUnknown	1209	962	1641	1255	1834	5522	4825	3131	36	35	43	44	69	69	85	136
Tb927.10.13650	ARF-like 2-binding protein, putative	Vesicular.transport	1210	1063	2324	1707	2075	6877	5453	4331	36	38	61	60	78	86	96	189
Tb927.10.4270	coatomer zeta subunit, (zeta-CoP)	Vesicular.transport	1210	1519	2201	1654	1535	5164	3804	2384	36	55	58	58	58	65	67	104
Tb927.11.11300	hypothetical protein, conserved	ZUnknown	1210	820	2181	1765	1614	4867	3881	2215	36	30	58	62	61	61	68	96
Tb927.11.3090	FOR20	Cytoskeleton	1211	1157	1754	1414	1678	4976	3744	2018	36	42	46	50	63	63	66	88
Tb927.11.9340	Galactose oxidase, central domain containing protein, putative	ZUnknown	1211	430	1351	1070	1012	2461	1785	679	36	16	36	38	38	31	31	30
Tb927.1.3670	ESAG8, putative	ESAG	1212	368	667	531	561	1595	1296	239	36	13	18	19	21	20	23	10
Tb927.10.14280	mitochondrial carrier protein, MCP20	Mito.transport	1212	862	1769	1366	1102	2901	1986	663	36	31	47	48	42	36	35	29
Tb927.11.13960	LSm4	RNA.processing	1213	1088	1704	1418	1701	5547	4412	2686	36	39	45	50	64	70	78	117
Tb927.8.4530	hypothetical protein, conserved	ZUnknown	1213	1077	3380	2483	1236	3750	3297	1807	36	39	89	87	47	47	58	79
Tb927.9.7370	ESAG9, putative	ESAG	1213	1157	432	307	777	2732	1600	441	36	42	11	11	29	34	28	19
Tb927.11.10400	Mitchondrial SSU ribosomal protein	Mito.translation	1216	938	2674	2024	1980	5860	4511	2585	36	34	71	71	75	74	79	113
Tb927.11.12910	prefoldin subunit, putative	ZUnknown	1216	696	1319	994	1183	2953	2753	1129	36	25	35	35	45	37	48	49
Tb927.8.6550	hypothetical protein, conserved	ZUnknown	1216	391	2598	1903	2786	8614	5246	2046	36	14	69	67	105	108	92	89
Tb927.2.1720	hypothetical protein, conserved	ZUnknown	1217	777	2273	1719	1912	6225	4582	2767	36	28	60	60	72	78	81	121
Tb927.8.2530	NADH-ubiquinone oxidoreductase complex I subunit, putative	Mito.pathway	1218	1157	2067	1595	1514	4737	3467	1793	36	42	55	56	57	60	61	78
Tb927.11.10050	Mitchondrial LSU ribosomal protein	Mito.translation	1220	1072	3820	2913	2139	6678	4393	2444	36	39	101	102	81	84	77	106
Tb927.11.12730	hypothetical protein	ZUnknown	1220	834	1449	1011	1970	5508	4223	3092	36	30	38	36	74	69	74	135
Tb927.11.6020	hypothetical protein, conserved	ZUnknown	1220	1211	1948	1320	1744	5416	4167	2635	36	44	51	46	66	68	73	115
Tb927.7.6720	hypothetical protein, conserved	ZUnknown	1221	693	1017	708	811	1715	1372	483	36	25	27	25	31	22	24	21
Tb927.11.5200	hypothetical protein, conserved	ZUnknown	1222	1004	2033	1399	1422	4055	3374	1688	36	36	54	49	54	51	59	74
Tb927.11.13530	hypothetical protein, conserved	ZUnknown	1223	709	1732	1236	1585	4487	3537	1400	36	26	46	43	60	56	62	61
Tb927.9.4810	hypothetical protein, conserved	ZUnknown	1225	654	1846	1482	1303	3471	2605	990	37	24	49	52	49	44	46	43
Tb927.11.12040	component of cytochrome c oxidase complex	Mito.e.transport	1226	859	12919	10163	6263	20886	12479	7106	37	31	342	358	236	262	220	310
Tb927.5.3490	hypothetical protein, conserved, LRR-RI like domain	ZUnknown	1227	1094	2197	1521	1479	4577	3738	1928	37	39	58	54	56	57	66	84
Tb927.7.1890	hypothetical protein, copurified with splicing complex	ZUnknown	1227	776	2185	1595	1717	5378	4295	2366	37	28	58	56	65	68	76	103
Tb927.10.1660	hypothetical protein, conserved	Mito.pathway	1229	877	3133	2245	2039	6418	4294	2550	37	32	83	79	77	81	76	111
Tb927.4.1520	Pestivirus Npro endopeptidase C53, putative	ZUnknown	1230	548	1408	1101	1246	3695	2718	889	37	20	37	39	47	46	48	39
Tb927.5.2370	hydrolase, alpha/beta fold family, putative	Enzyme	1230	1944	3054	2185	2583	7768	6550	2269	37	70	81	77	97	98	115	99
Tb927.8.5660	hypothetical protein, conserved	Mito.pathway	1231	595	2478	1848	1897	6479	4905	3543	37	21	66	65	71	81	86	154
Tb927.8.920	ubiquitin-conjugating enzyme e2, putative (PEX4?)	Ubiquitin.proteasome	1231	1081	1946	1490	2078	6863	5014	3994	37	39	51	52	78	86	88	174
Tb927.9.13240	hypothetical protein, conserved	ZUnknown	1231	723	817	729	911	2125	1578	614	37	26	22	26	34	27	28	27
Tb927.1.1300	hypothetical transmembrane protein, conserved	ZUnknown	1232	955	1359	1007	1461	4649	4100	2644	37	34	36	35	55	58	72	115
Tb927.7.1620	CFI25m	RNA.processing	1232	728	750	641	631	1645	1205	327	37	26	20	23	24	21	21	14
Tb927.8.2890	hypothetical protein, conserved	ZUnknown	1232	859	1982	1380	1470	3872	2719	994	37	31	52	49	55	49	48	43
Tb927.10.11200	hypothetical protein, conserved	ZUnknown	1233	470	1941	1240	2084	6940	6185	3954	37	17	51	44	79	87	109	172
Tb927.3.3240	hypothetical protein, conserved	ZUnknown	1233	803	3014	2342	2803	8616	5638	3492	37	29	80	82	106	108	99	152
Tb927.7.7440	hypothetical protein, conserved	Mito.pathway	1233	1117	3794	3458	2712	8398	5314	3038	37	40	100	122	102	105	94	132
Tb927.10.12080	hypothetical protein, conserved	ZUnknown	1234	711	1945	1398	1512	4916	4358	2775	37	26	51	49	57	62	77	121
Tb927.10.16180	hypothetical protein, conserved	ZUnknown	1235	531	1069	900	679	1635	1141	392	37	19	28	32	26	21	20	17
Tb927.10.2970	hypothetical protein, conserved	ZUnknown	1235	813	17420	13805	8859	32945	19005	7354	37	29	461	486	334	414	335	320
Tb927.11.11120	hypothetical protein, conserved	ZUnknown	1235	863	2297	1699	1439	4021	2999	1117	37	31	61	60	54	51	53	49
Tb927.11.10250	hypothetical protein, conserved	ZUnknown	1236	1143	2037	1504	1815	5894	4328	2237	37	41	54	53	68	74	76	97
Tb927.10.1600	hypothetical protein, conserved	ZUnknown	1237	1045	1383	1020	1263	3488	3176	1810	37	38	37	36	48	44	56	79
Tb927.4.4190	C2 domain containing protein, putative	ZUnknown	1237	1217	949	678	877	2811	1689	590	37	44	25	24	33	35	30	26
Tb927.9.10000	hypothetical protein, conserved	ZUnknown	1237	937	1315	929	1074	3791	3331	2003	37	34	35	33	40	48	59	87
Tb927.11.2070	hypothetical protein, conserved	ZUnknown	1238	886	2332	1621	1800	5808	4495	2711	37	32	62	57	68	73	79	118
Tb927.11.5920	conserved protein	Mito.pathway	1238	454	2572	1910	2094	5008	3444	812	37	16	68	67	79	63	61	35
Tb927.3.1160	hypothetical protein, conserved	ZUnknown	1238	537	1825	1236	1236	3338	2965	1256	37	19	48	43	47	42	52	55
Tb927.3.3620	hypothetical protein, conserved	ZUnknown	1238	883	1123	799	1013	2577	2074	890	37	32	30	28	38	32	37	39
Tb927.10.13170	hypothetical protein, conserved	ZUnknown	1239	412	1315	970	1336	3759	2443	506	37	15	35	34	50	47	43	22
Tb927.7.3890	hypothetical protein, conserved	ZUnknown	1239	883	1338	938	1089	3558	2482	958	37	32	35	33	41	45	44	42
Tb927.5.2700	otubain cysteine peptidase, Clan CA, family C65, putative	Protease	1240	2277	3041	2133	2361	7505	5045	1238	37	82	80	75	89	94	89	54
Tb927.11.15390	hypothetical protein	ZUnknown	1241	481	463	389	639	1843	1302	543	37	17	12	14	24	23	23	24
Tb927.11.14150	27 / Snt309	RNA.processing	1242	803	1528	1027	1230	3693	3631	2230	37	29	40	36	46	46	64	97
Tb927.3.2670	hypothetical protein, conserved	Mito.pathway	1243	700	2326	1951	1434	3840	2676	823	37	25	61	69	54	48	47	36
Tb927.8.1930	ISY1 component of PRP19 splicing complex, putative	RNA.processing	1244	1040	2210	1610	1527	5384	4312	2396	37	37	58	57	58	68	76	104
Tb927.11.8850	Uncharacterised protein family (UPF0220), putative	ZUnknown	1245	1057	1539	1164	1647	4665	3700	2353	37	38	41	41	62	59	65	102
Tb927.3.4240	tryparedoxin 2, TRX2	Redox	1245	887	1802	1365	1349	4215	3613	1978	37	32	48	48	51	53	64	86
Tb927.4.1810	Mitchondrial LSU ribosomal protein	Mito.translation	1245	1209	2172	1594	1647	4962	3737	2137	37	44	57	56	62	62	66	93
Tb927.10.8670	hypothetical protein, conserved	ZUnknown	1246	999	1293	1216	1361	3806	2980	1184	37	36	34	43	51	48	52	52
Tb927.11.11630	Mitchondrial LSU ribosomal protein	Mito.translation	1246	849	2770	1892	1615	4905	3296	716	37	31	73	67	61	62	58	31
Tb927.9.10850	U2 splicing factor SF3b(SAP)10, putative	RNA.processing	1246	875	1552	1216	1437	4939	4327	2948	37	32	41	43	54	62	76	128
Tb927.8.5700	hypothetical protein, conserved	ZUnknown	1247	522	887	697	762	1970	1371	406	37	19	23	25	29	25	24	18
Tb927.3.2300	DNL zinc finger, putative	Mito.pathway	1248	1139	2850	2134	1733	5784	4597	2672	37	41	75	75	65	73	81	116
Tb927.6.4720	ZC3H15	RNA.binding	1249	870	693	434	480	1204	987	236	37	31	18	15	18	15	17	10
Tb927.5.3110	Mitchondrial LSU ribosomal protein	Mito.translation	1250	1019	1890	1314	1421	3912	2917	1428	37	37	50	46	54	49	51	62
Tb927.6.3880	hypothetical protein, conserved	ZUnknown	1250	761	1243	606	1011	2390	2624	910	37	27	33	21	38	30	46	40
Tb927.7.4200	hypothetical protein, conserved	ZUnknown	1250	865	1845	1392	1188	2940	2509	938	37	31	49	49	45	37	44	41
Tb927.10.9220	hypothetical protein, conserved	ZUnknown	1251	666	578	366	812	1789	1446	341	37	24	15	13	31	22	25	15
Tb927.10.9120	hypothetical protein, conserved	Mito.pathway	1252	833	1725	1162	1123	3050	2736	1061	37	30	46	41	42	38	48	46
Tb927.2.4200	protein kinase, putative	Protein.kinase	1253	702	1007	521	462	911	790	119	37	25	27	18	17	11	14	5
Tb927.8.4770	small GTP-binding protein Rab18	Vesicular.transport	1253	609	1920	1493	2385	6889	4794	2361	37	22	51	53	90	87	84	103
Tb927.9.6870	RBSR1	RNA.processing	1254	1091	2853	2118	2004	6153	4192	2535	37	39	75	75	76	77	74	110
Tb927.10.1870	Mitchondrial LSU ribosomal protein	Mito.translation	1255	1000	2618	1964	1861	5969	3962	2533	37	36	69	69	70	75	70	110
Tb927.3.4870	hypothetical protein, conserved	ZUnknown	1255	1363	2991	2435	2229	6679	4578	2618	37	49	79	86	84	84	81	114
Tb927.6.1600	hypothetical protein, conserved	ZUnknown	1258	1193	3439	2620	2292	7002	5059	2660	38	43	91	92	86	88	89	116
Tb927.4.2710	ubiquitin-conjugating enzyme e2, putative	Ubiquitin.proteasome	1259	1042	1315	909	1523	4994	4407	2471	38	38	35	32	57	63	78	108
Tb927.11.2200	DNA-directed RNA polymerase II, putative (RPB11)	RNA.synthesis	1260	1117	2537	2091	2317	7658	5601	3268	38	40	67	74	87	96	99	142
Tb927.8.6530	SET domain containing protein, putative	ZUnknown	1260	387	693	565	652	1884	1150	406	38	14	18	20	25	24	20	18
Tb927.10.3960	hypothetical protein, conserved	ZUnknown	1261	1279	2111	1555	1600	4331	2484	896	38	46	56	55	60	54	44	39
Tb927.3.4130	hypothetical protein, conserved	ZUnknown	1261	850	2050	1442	1387	3508	2986	1223	38	31	54	51	52	44	53	53
Tb927.5.1030	Iron-sulfur assembly protein 2 (Isa2)	Enzyme	1261	743	1618	1198	897	2328	1812	516	38	27	43	42	34	29	32	22
Tb927.9.15980	nucleoside transporter 1, putative	Nucleotides	1261	1180	301	150	738	1979	1724	649	38	43	8	5	28	25	30	28
Tb927.10.12970	AN1-like zinc finger, putative	ZUnknown	1262	944	1807	1202	1148	3038	2451	770	38	34	48	42	43	38	43	34
Tb927.10.16170	potassium voltage-gated channel, putative	Ions	1265	527	1195	974	770	1949	1639	308	38	19	32	34	29	24	29	13
Tb927.3.3810	Etoposide-induced protein 2.4 (EI24), putative	ZUnknown	1265	997	996	722	921	2281	1629	614	38	36	26	25	35	29	29	27
Tb927.10.8750	TBC-Q2 likely GAP	Signalling	1266	917	1922	1254	1439	3721	3255	1128	38	33	51	44	54	47	57	49
Tb927.8.4830	U1 small nuclear ribonucleoprotein, putative (RBP24 U1-70K)	RNA.processing	1266	898	1767	1314	1863	5290	4792	3231	38	32	47	46	70	66	84	141
Tb927.11.16320	hypothetical protein, conserved	ZUnknown	1268	1024	2101	1653	1838	5437	4581	3015	38	37	56	58	69	68	81	131
Tb927.5.1370	cyclophilin-type peptidyl-prolyl cis-trans isomerase, putative (PPIase)	Chaperone	1268	898	1280	926	1282	3492	2854	1281	38	32	34	33	48	44	50	56
Tb927.8.6380	hypothetical protein, conserved	ZUnknown	1268	1054	4066	2897	2490	7019	4605	2259	38	38	107	102	94	88	81	98
Tb927.9.8650	hypothetical protein, conserved	ZUnknown	1268	1226	1391	1141	1179	3597	2936	1294	38	44	37	40	44	45	52	56
Tb927.11.10420	DNA-directed RNA polymerase, putative (RPA12)	RNA.synthesis	1270	1007	2061	1497	1483	4260	3530	2055	38	36	54	53	56	54	62	90
Tb927.2.2900	ARP2/3 complex subunit, putative	Cytoskeleton	1270	1063	2114	1555	1756	6419	5030	3403	38	38	56	55	66	81	89	148
Tb927.5.2340	hypothetical protein, conserved	ZUnknown	1271	2076	1921	1260	1776	5003	4173	1119	38	75	51	44	67	63	73	49
Tb927.10.340	mitochondrial structure specific endonuclease I (SSE-1), putative	Mito.DNA	1272	885	989	641	540	1268	1170	310	38	32	26	23	20	16	21	14
Tb927.11.2960	hypothetical protein, copurified with splicing complex	ZUnknown	1273	817	2686	2254	2216	8596	7645	4567	38	29	71	79	84	108	135	199
Tb927.11.520	hypothetical protein, tryp specific	ZUnknown	1273	820	2122	1298	1216	3385	3160	1601	38	30	56	46	46	43	56	70
Tb927.10.12530	chaperone protein DNAj, putative	Chaperone	1277	580	1519	1115	1713	5377	4308	2896	38	21	40	39	65	68	76	126
Tb927.6.4150	hypothetical protein, conserved, tryp specific	ZUnknown	1277	1161	2224	1665	1825	5985	4851	2920	38	42	59	59	69	75	85	127
Tb927.8.1120	hypothetical protein, conserved	ZUnknown	1277	1045	1563	1065	1216	3164	2639	1241	38	38	41	37	46	40	46	54
Tb927.4.1770	hypothetical protein, conserved	ZUnknown	1279	791	1714	1190	1075	3220	2093	809	38	29	45	42	41	40	37	35
Tb927.9.12890	hypothetical protein, conserved, Atrophin-1 domain	ZUnknown	1279	1233	1041	911	911	3401	2419	865	38	44	28	32	34	43	43	38
Tb927.10.6380	ring finger containing protein	Zinc.finger	1280	1167	2397	1711	1509	4126	3188	1373	38	42	63	60	57	52	56	60
Tb927.9.13120	POMP8	Mito.membrane	1280	1217	1795	1403	1593	4666	4042	2890	38	44	47	49	60	59	71	126
Tb927.9.3780	MPC1 mitochondrial pyruvate carrier	Mito.membrane	1281	957	4928	3628	3167	10229	7317	3578	38	34	130	128	119	128	129	156
Tb927.10.15600	FKBP-type peptidyl-prolyl cis-trans isomerase, conserved	Chaperone	1282	1244	1270	898	837	2345	2194	828	38	45	34	32	32	29	39	36
Tb927.9.15040	DTW domain containing protein, putative	ZUnknown	1283	1075	2438	1657	1915	6240	4783	3400	38	39	64	58	72	78	84	148
Tb927.10.10830	RGG2, MRB complex component	Mito.RNA	1284	598	1789	1675	968	2534	1399	521	38	22	47	59	36	32	25	23
Tb927.3.2990	hypothetical protein, conserved	ZUnknown	1284	1158	2897	2214	2081	5849	4895	2698	38	42	77	78	78	73	86	118
Tb927.4.1000	hypothetical protein, conserved	ZUnknown	1284	617	1076	436	672	1278	1092	331	38	22	28	15	25	16	19	14
Tb927.10.7190	D-tyrosyl-tRNA deacylase, putative	rRNA.tRNA.process	1285	710	1931	1379	1497	4504	3494	2230	38	26	51	49	56	57	62	97
Tb927.5.2460	hypothetical protein, conserved	ZUnknown	1285	2158	1286	717	1367	4585	4868	2072	38	78	34	25	52	58	86	90
Tb927.7.2210	hypothetical protein, conserved	ZUnknown	1285	1259	5626	4452	2817	8299	5814	2460	38	45	149	157	106	104	102	107
Tb927.11.15920	glutathione peroxidase, putative (PxIV)	Redox	1287	1045	2493	1885	2089	7219	5115	3167	38	38	66	66	79	91	90	138
Tb927.5.4120	Mitchondrial LSU ribosomal protein	Mito.translation	1287	779	2618	1935	1236	3210	2744	874	38	28	69	68	47	40	48	38
Tb927.10.11670	hypothetical protein, conserved	ZUnknown	1288	786	1943	1402	1699	4576	3171	962	38	28	51	49	64	57	56	42
Tb927.6.4270	hypothetical protein, conserved, NADH dehydrogenase?	ZUnknown	1288	829	2500	1690	1550	4235	3305	1278	38	30	66	59	58	53	58	56
Tb927.1.1390	hypothetical protein, conserved	ZUnknown	1289	1107	3124	2269	1835	5788	4024	1953	38	40	83	80	69	73	71	85
Tb927.10.4660	Transcription factor S-II (TFIIS), central domain containing protein, putative	ZUnknown	1290	861	2249	1664	2293	8001	6815	4486	38	31	59	59	86	100	120	195
Tb927.7.2760	Mitchondrial LSU ribosomal protein	Mito.translation	1290	837	2649	1760	1608	4984	3854	1944	38	30	70	62	61	63	68	85
Tb927.8.6320	hypothetical protein, conserved	ZUnknown	1291	624	1070	756	721	1723	1389	389	39	22	28	27	27	22	24	17
Tb927.10.7920	hypothetical protein, conserved	ZUnknown	1292	807	1649	1298	1162	3931	2931	1089	39	29	44	46	44	49	52	47
Tb927.11.1940	hypothetical protein, conserved	ZUnknown	1292	1199	1800	1203	1221	3610	2947	1188	39	43	48	42	46	45	52	52
Tb927.11.7280	DNA-direcetd RNA polymerase II, subunit 9, putative (RPB9)	RNA.synthesis	1292	847	2753	1990	1836	5764	4045	2241	39	31	73	70	69	72	71	98
Tb927.1.4010	TbPRI2, primase 2, kDNA replication	Mito.DNA	1294	588	328	204	254	443	440	210	39	21	9	7	10	6	8	9
Tb927.7.5800	hypothetical protein	ZUnknown	1294	1295	1395	1041	1820	5805	4882	2636	39	47	37	37	69	73	86	115
Tb927.8.1440	maoC-like dehydratase, putative	Enzyme	1294	899	2929	2066	1655	4799	3346	1157	39	32	77	73	62	60	59	50
Tb927.10.15820	hypothetical protein, conserved	ZUnknown	1295	717	1992	1615	1498	4603	3074	1268	39	26	53	57	56	58	54	55
Tb927.10.16160	protein kinase, putative	Protein.kinase	1295	975	2231	1632	1998	5962	4938	3490	39	35	59	57	75	75	87	152
Tb927.10.14930	ZC3H39	RNA.binding	1296	892	1268	609	673	1199	1095	298	39	32	34	21	25	15	19	13
Tb927.11.340	hypothetical protein, conserved	ZUnknown	1296	1353	895	556	673	1938	1617	259	39	49	24	20	25	24	28	11
Tb927.1.1210	conserved protein, unknown function	ZUnknown	1299	1209	3283	2366	1828	5100	4032	1824	39	44	87	83	69	64	71	79
Tb927.10.8140	EVE domain containing protein, putative	ZUnknown	1299	808	3373	2451	2657	8077	5732	4365	39	29	89	86	100	101	101	190
Tb927.11.870	Mitchondrial LSU ribosomal protein	Mito.translation	1299	708	1153	891	787	2004	1557	444	39	26	30	31	30	25	27	19
Tb927.11.7850	hypothetical protein, conserved	ZUnknown	1301	843	1501	1228	1025	2556	1991	644	39	30	40	43	39	32	35	28
Tb927.8.3970	oxidoreductase, putative	Enzyme	1301	399	876	751	533	1401	839	297	39	14	23	26	20	18	15	13
Tb927.10.580	hypothetical protein, conserved	ZUnknown	1302	965	1866	1416	1563	4529	4307	2756	39	35	49	50	59	57	76	120
Tb927.8.5740	proteasome 26S non-ATPase subunit 9, putative	Ubiquitin.proteasome	1302	693	1211	935	1032	2861	2596	981	39	25	32	33	39	36	46	43
Tb927.4.4170	rRNA methyltransferase, putative	rRNA.tRNA.process	1303	688	1582	1214	1659	4635	3995	1385	39	25	42	43	63	58	70	60
Tb927.11.11910	hypothetical protein, conserved	ZUnknown	1304	1012	2270	1688	1594	5248	4203	1946	39	36	60	59	60	66	74	85
Tb927.3.2120	hypothetical protein, conserved	ZUnknown	1304	876	1680	1191	1152	3167	2129	940	39	32	44	42	43	40	37	41
Tb927.10.940	hypothetical protein, conserved, kinetoplastid-specific	ZUnknown	1305	567	670	599	758	2025	1759	576	39	20	18	21	29	25	31	25
Tb927.9.10360	hypothetical protein, conserved	ZUnknown	1306	1080	1090	855	1427	4966	3628	2187	39	39	29	30	54	62	64	95
Tb927.9.3480	U5 Cwc21 small nuclear ribonucleoprotein (TbCWC21)	RNA.processing	1306	888	1369	1015	825	2134	1612	496	39	32	36	36	31	27	28	22
Tb927.11.7160	CRK8 cdc2- like protein kinase	Protein.kinase	1307	393	403	318	328	767	675	180	39	14	11	11	12	10	12	8
Tb927.8.3020	hypothetical protein, conserved	ZUnknown	1307	473	342	198	315	478	413	178	39	17	9	7	12	6	7	8
Tb927.11.7970	hypothetical protein, conserved	ZUnknown	1308	1195	1917	1282	1443	4357	3359	1699	39	43	51	45	54	55	59	74
Tb927.4.4660	Protein of unknown function DUF84, putative	ZUnknown	1308	1255	2184	1640	1568	4745	3308	1781	39	45	58	58	59	60	58	78
Tb927.10.4790	hypothetical protein, conserved	ZUnknown	1309	947	1687	1353	1730	5585	3943	2661	39	34	45	48	65	70	69	116
Tb927.11.3520	Acyl CoA binding protein, putative	ZUnknown	1311	973	1380	993	1283	3590	3014	1095	39	35	36	35	48	45	53	48
Tb927.4.790	hypothetical protein, conserved	ZUnknown	1311	1332	1284	874	1312	3524	3258	1379	39	48	34	31	49	44	57	60
Tb927.6.710	dephospho-CoA kinase, putative	Enzyme	1311	699	1738	1395	1288	3670	2593	798	39	25	46	49	49	46	46	35
Tb927.7.5360	Haemolysin-III related, putative	ZUnknown	1311	899	1627	1229	1375	3662	2702	1085	39	32	43	43	52	46	48	47
Tb927.9.2450	electron transport protein SCO1/SCO2, putative	Mito.e.transport	1311	1018	2784	1813	1332	3278	2821	778	39	37	74	64	50	41	50	34
Tb927.11.13210	hypothetical protein, conserved	ZUnknown	1312	727	993	788	704	1915	1339	302	39	26	26	28	27	24	24	13
Tb927.6.3970	SH3 domain protein, conserved	ZUnknown	1312	1024	1116	798	894	2623	2283	913	39	37	30	28	34	33	40	40
Tb927.9.11740	cyclophilin type peptidyl-prolyl cis-trans isomerase, putative (PPIase)	Chaperone	1312	751	2010	1377	1300	3556	2476	1138	39	27	53	48	49	45	44	50
Tb927.9.3370	thioredoxin (trx)	Redox	1312	960	3204	2393	2341	7454	5246	3102	39	35	85	84	88	94	92	135
Tb927.8.7550	hypothetical protein	ZUnknown	1313	592	347	295	259	591	517	123	39	21	9	10	10	7	9	5
Tb927.10.10670	kinetoplastid-specific dual specificity phosphatase, putative	Phosphatase	1314	971	3964	2842	1691	4712	3708	1431	39	35	105	100	64	59	65	62
Tb927.7.6200	chaperone protein DNAj, putative	Chaperone	1314	1226	4020	3168	2175	6620	4960	2983	39	44	106	111	82	83	87	130
Tb927.11.10440	hypothetical protein, conserved	ZUnknown	1315	1069	1911	1469	1794	4888	3821	1692	39	39	51	52	68	61	67	74
Tb927.11.180	electron transfer flavoprotein, putative	Mito.e.transport	1315	1067	3639	2873	1912	6345	4679	2619	39	38	96	101	72	80	82	114
Tb927.3.3710	Scavenger mRNA decapping enzyme C-term binding, putative	ZUnknown	1315	1234	3131	2142	2170	7051	5171	3308	39	44	83	75	82	89	91	144
Tb927.3.4810	DNA replication complex GINS protein SLD5, putative	DNA	1315	1020	1579	1064	1220	3869	3261	1212	39	37	42	37	46	49	57	53
Tb927.4.1760	hypothetical protein, conserved	Mito.pathway	1315	874	1677	1198	1117	3075	1968	769	39	32	44	42	42	39	35	33
Tb927.5.4350	NUDIX hydrolase, putative	Enzyme	1315	942	1481	889	1318	3440	2887	1613	39	34	39	31	50	43	51	70
Tb927.10.13600	hypothetical protein, possible component of cytochorome oxidase complex	Mito.e.transport	1316	977	4576	3229	2484	7752	4943	2657	39	35	121	114	94	97	87	116
Tb927.11.250	ubiquitin carboxyl-terminal hydrolase, Clan CA cysteine peptidase, family C12, putative	Ubiquitin.proteasome	1316	1266	2747	1871	1496	4169	2985	1628	39	46	73	66	56	52	53	71
Tb927.7.2460	hypothetical protein, conserved	ZUnknown	1316	748	879	739	659	1550	1079	283	39	27	23	26	25	19	19	12
Tb927.4.5080	hypothetical protein, conserved	ZUnknown	1317	841	4399	3502	3057	10588	7324	5238	39	30	116	123	115	133	129	228
Tb927.9.10040	protein kinase, putative	Protein.kinase	1317	644	1170	834	1233	3527	2678	1104	39	23	31	29	46	44	47	48
Tb927.9.13430	ubiquitin carboxyl-terminal hydrolase, Clan CA cysteine peptidase, family C12, putative	Ubiquitin.proteasome	1319	884	772	393	666	1456	1257	424	39	32	20	14	25	18	22	18
Tb927.10.3600	hypothetical protein, conserved	ZUnknown	1320	854	414	274	632	1356	1014	221	39	31	11	10	24	17	18	10
Tb927.7.3320	ATG12/APG12, putative (ATG12)	Lysosome	1321	1055	1556	1189	1833	4943	4131	1778	39	38	41	42	69	62	73	77
Tb927.9.5280	Mitchondrial SSU ribosomal protein	Mito.translation	1322	764	1237	807	867	1965	1519	412	39	28	33	28	33	25	27	18
Tb927.9.6390	hypothetical protein, conserved	ZUnknown	1323	579	1522	1083	1495	4780	4054	2313	39	21	40	38	56	60	71	101
Tb927.3.1970	DNA / pantothenate metabolism flavoprotein, putative	ZUnknown	1325	978	2674	1907	1409	3745	2664	701	40	35	71	67	53	47	47	31
Tb927.6.1620	Zn-finger in Ran binding protein and others, putative	Zinc.finger	1325	973	1568	1039	1475	3709	3122	1248	40	35	41	37	56	47	55	54
Tb927.11.12300	hypothetical protein, conserved	ZUnknown	1326	446	1650	1291	1329	4098	3117	1237	40	16	44	45	50	51	55	54
Tb927.11.3720	Ring finger domain containing protein, putative	ZUnknown	1326	748	450	198	403	568	607	212	40	27	12	7	15	7	11	9
Tb927.8.5430	Snf7, putative	ZUnknown	1326	707	2005	1437	1897	6440	4700	2948	40	25	53	51	71	81	83	128
Tb927.7.4670	RRP4 exosome complex PH subunit	RNA.degradation	1327	1474	2742	2105	1561	4474	2998	1403	40	53	72	74	59	56	53	61
Tb927.7.4020	protein phosphatase 2C, putative	Protein.phosphatase	1328	550	237	142	217	365	298	123	40	20	6	5	8	5	5	5
Tb927.11.9230	hypothetical protein, conserved	ZUnknown	1329	979	1900	1357	1695	4451	3684	1555	40	35	50	48	64	56	65	68
Tb927.9.14410	CE1, cytosolic re-capping	RNA.processing	1329	664	2051	1475	852	2014	1950	694	40	24	54	52	32	25	34	30
Tb927.5.2910	hypothetical protein, copurifed with splicing complex	ZUnknown	1330	1287	2309	1553	1914	6244	4257	2669	40	46	61	55	72	78	75	116
Tb927.9.10300	hypothetical protein, conserved	ZUnknown	1330	1080	2537	1819	2701	7957	5795	4196	40	39	67	64	102	100	102	183
Tb927.10.9200	Nuclease-related domain containing protein, putative	ZUnknown	1331	819	1961	1260	1207	3131	2839	1445	40	30	52	44	45	39	50	63
Tb927.11.17010	Rab5-interacting protein (Rab5ip), putative	ZUnknown	1331	1432	2798	1990	2799	8206	5969	4902	40	52	74	70	105	103	105	214
Tb927.11.12090	endonuclease III, putative	DNA	1332	1122	1482	1091	1283	4277	3295	2402	40	40	39	38	48	54	58	105
Tb927.11.470	transcription factor, putative,transcription factor IIIb, putative	RNA.synthesis	1332	1180	1404	910	1275	3639	2798	732	40	43	37	32	48	46	49	32
Tb927.10.1880	hypothetical protein, conserved	ZUnknown	1333	1166	2394	1745	1509	4542	3530	1805	40	42	63	61	57	57	62	79
Tb927.10.8250	hypothetical protein, conserved	ZUnknown	1333	1026	1736	1211	1358	3560	3158	1414	40	37	46	43	51	45	56	62
Tb927.8.870	serine/threonine kinase, putative,protein kinase, putative	Protein.kinase	1333	1111	970	441	766	1797	1665	371	40	40	26	16	29	23	29	16
Tb927.11.6640	cytochrome b5, putative (CYB5)	Mito.e.transport	1335	1262	4417	3450	2656	9616	7240	4192	40	45	117	121	100	121	128	183
Tb927.10.9790	hypothetical protein, conserved	ZUnknown	1336	1558	1654	1358	1801	5438	5020	3173	40	56	44	48	68	68	88	138
Tb927.11.9770	hypothetical protein, conserved	ZUnknown	1336	775	1139	788	760	1664	1435	385	40	28	30	28	29	21	25	17
Tb927.7.3470	p22 protein precursor, putative	Mito.pathway	1336	1239	1978	1397	1813	5809	3732	2066	40	45	52	49	68	73	66	90
Tb927.10.5960	engulfment and cell motility domain 2, putative	Cytoskeleton	1337	943	650	366	851	1771	1644	614	40	34	17	13	32	22	29	27
Tb927.8.2150	hypothetical protein, conserved	ZUnknown	1337	1226	1855	1303	1539	4934	3794	1660	40	44	49	46	58	62	67	72
Tb927.5.2380	hydrolase, alpha/beta fold family, putative	Enzyme	1338	2543	7209	5014	4381	13847	9700	4661	40	92	191	176	165	174	171	203
Tb927.6.1440	Mitchondrial LSU ribosomal protein	Mito.translation	1339	1199	1874	1199	1635	4689	3690	1116	40	43	50	42	62	59	65	49
Tb927.8.4380	ATOM12 - POMP40	Mito.biogenesis	1340	1628	6203	4753	2593	8205	5727	2392	40	59	164	167	98	103	101	104
Tb927.10.15320	hypothetical protein, conserved	ZUnknown	1341	1389	2125	1543	2070	6404	4423	2922	40	50	56	54	78	80	78	127
Tb927.11.8090	protein phosphatase 1, putative	Protein.phosphatase	1341	707	643	504	361	679	482	119	40	25	17	18	14	9	8	5
Tb927.11.16380	TPR repeat, putative	ZUnknown	1342	1139	1539	1195	1154	3076	2259	702	40	41	41	42	43	39	40	31
Tb927.3.2590	hypothetical protein	ZUnknown	1343	520	33	21	367	1021	953	266	40	19	1	1	14	13	17	12
Tb927.5.1970	hypothetical protein, T. brucei-specific, no domains	ZUnknown	1343	961	726	386	717	1859	2054	1182	40	35	19	14	27	23	36	51
Tb927.11.2800	hypothetical protein, conserved	ZUnknown	1345	1264	2370	1614	1691	4591	3775	1952	40	46	63	57	64	58	66	85
Tb927.5.3890	hypothetical protein, conserved	ZUnknown	1345	779	3233	2085	2346	6558	5376	2571	40	28	85	73	88	82	95	112
Tb927.9.10200	hypothetical protein, conserved	ZUnknown	1345	1096	2248	1675	2321	7763	6260	4639	40	40	59	59	87	98	110	202
Tb927.11.13750	Ras-related protein Rab4	Vesicular.transport	1346	1249	2725	2175	2105	7177	5072	2823	40	45	72	77	79	90	89	123
Tb927.11.280	hypothetical protein, conserved, no domains	ZUnknown	1346	945	1527	1055	868	2442	1492	326	40	34	40	37	33	31	26	14
Tb927.9.2120	hypothetical protein, conserved, E-7 to a helicobacter recombinase	ZUnknown	1346	1091	2559	1822	1307	3439	3235	1436	40	39	68	64	49	43	57	63
Tb927.11.9140	mitochondrial RNA binding complex 1 subunit (MRB0880)	Mito.RNA	1347	727	1774	1532	1314	3428	2477	557	40	26	47	54	50	43	44	24
Tb927.8.2840	hypothetical protein, conserved	ZUnknown	1347	565	2642	2118	1988	5682	2992	566	40	20	70	75	75	71	53	25
Tb927.10.11370	hypothetical protein, conserved	ZUnknown	1349	933	2323	1645	1761	5205	4025	2325	40	34	61	58	66	65	71	101
Tb927.11.3530	Complex1_LYR-like, putative	ZUnknown	1349	732	1720	1500	1194	2992	2336	711	40	26	45	53	45	38	41	31
Tb927.8.860	hypothetical protein, conserved	ZUnknown	1350	1153	1512	998	1259	3875	3242	1355	40	42	40	35	47	49	57	59
Tb927.11.15510	hypothetical protein, conserved	ZUnknown	1351	1170	2724	2049	1462	4347	3517	2077	40	42	72	72	55	55	62	90
Tb927.2.3970	hypothetical protein, conserved	ZUnknown	1351	1075	1450	986	1163	3856	3149	1176	40	39	38	35	44	48	55	51
Tb927.8.2510	hypothetical protein, conserved	ZUnknown	1356	566	2813	2065	2757	8414	5711	3395	40	20	74	73	104	106	101	148
Tb927.8.4470	chaperone protein DNAj, putative	Chaperone	1356	823	2000	1578	1613	4475	3015	899	40	30	53	56	61	56	53	39
Tb927.10.12450	SNARE 2.1 of T cruzi	Lysosome	1357	1137	1958	1406	1754	5196	3838	2459	40	41	52	49	66	65	68	107
Tb927.10.16080	hypothetical protein, conserved	ZUnknown	1358	1195	4973	3729	2102	6292	4762	1789	41	43	131	131	79	79	84	78
Tb927.6.1700	hypothetical protein, conserved	ZUnknown	1358	1095	3337	2405	2298	6689	5104	2472	41	39	88	85	87	84	90	108
Tb927.6.4810	zinc-binding protein (Yippee), putative	Zinc.finger	1358	1197	1217	896	1917	5406	4135	2642	41	43	32	32	72	68	73	115
Tb927.9.3470	low molecular weight protein tyrosine phosphatase, putative	Protein.phosphatase	1359	775	3004	2239	2537	7877	6077	3880	41	28	79	79	96	99	107	169
Tb927.9.5370	2OG-Fe(II) oxygenase superfamily, putative	ZUnknown	1359	890	3102	2277	2428	6906	4222	2358	41	32	82	80	92	87	74	103
Tb927.9.10070	hypothetical protein, conserved	Mito.pathway	1360	726	2630	2167	1381	3213	2229	592	41	26	70	76	52	40	39	26
Tb927.9.3290	4F5 protein family, putative	ZUnknown	1361	885	1589	1157	1758	5913	3940	2368	41	32	42	41	66	74	69	103
Tb927.10.11290	hypothetical protein, conserved	ZUnknown	1362	988	3315	2142	2178	5947	4523	2229	41	36	88	75	82	75	80	97
Tb927.11.15640	mitochondrial RNA binding complex 1 subunit (MERS1)	Mito.RNA	1362	577	1050	871	677	1661	1059	272	41	21	28	31	26	21	19	12
Tb927.11.8330	hypothetical protein, conserved, 4 C2H2 Zn fingers	Zinc.finger	1362	732	192	85	345	660	549	177	41	26	5	3	13	8	10	8
Tb927.9.13200	hypothetical protein	ZUnknown	1362	1181	17749	14590	3474	9613	10522	3775	41	43	469	513	131	121	185	164
Tb927.8.2440	hypothetical protein, conserved	ZUnknown	1363	1001	1233	914	1358	4507	3222	632	41	36	33	32	51	57	57	28
Tb927.11.14080	CYC2, G1 cyclin	Cell.cycle	1364	1329	1967	1062	2048	5287	3774	1137	41	48	52	37	77	66	66	50
Tb927.10.11930	beta-D-hydroxybutyrate dehydrogenase	Mito.pathway	1365	880	2429	1897	1465	3871	2889	973	41	32	64	67	55	49	51	42
Tb927.6.3920	hypothetical protein, conserved	ZUnknown	1366	1226	2447	1704	1772	5157	3457	1709	41	44	65	60	67	65	61	74
Tb11.02.5105	POMP15	Mito.membrane	1367	970	3151	2292	2046	6517	4729	3132	41	35	83	81	77	82	83	136
Tb927.11.360	ATP-binding protein, putative	ZUnknown	1367	946	1252	883	685	1604	1250	270	41	34	33	31	26	20	22	12
Tb927.7.4820	Trm112p-like protein, putative	ZUnknown	1367	658	4646	3500	3000	9807	6454	3974	41	24	123	123	113	123	114	173
Tb927.8.4650	hypothetical protein, conserved	ZUnknown	1368	622	2758	2021	2677	8252	6097	3366	41	22	73	71	101	104	107	147
Tb927.10.11050	Mitchondrial LSU ribosomal protein	Mito.translation	1371	571	2904	2122	1720	4739	3487	1367	41	21	77	75	65	60	61	60
Tb927.9.10160	hypothetical protein, conserved	ZUnknown	1372	743	1695	1245	1267	4667	4036	1795	41	27	45	44	48	59	71	78
Tb927.10.9210	hypothetical protein, conserved	ZUnknown	1373	760	720	562	620	1730	1229	320	41	27	19	20	23	22	22	14
Tb927.4.1830	Urm1 (Ubiquitin related modifier), putative	ZUnknown	1375	1246	3409	2838	3187	10703	7997	6264	41	45	90	100	120	134	141	273
Tb927.6.4330	hypothetical protein, conserved	ZUnknown	1376	990	2391	1770	2129	6707	4623	3034	41	36	63	62	80	84	81	132
Tb927.3.4530	hypothetical protein, conserved	ZUnknown	1377	685	1497	1152	1218	3729	2820	1713	41	25	40	41	46	47	50	75
Tb927.4.3040	Enriched in surface-labeled proteome protein 11 (ESP11)	ZUnknown	1377	1303	1117	858	1357	3878	2765	1315	41	47	30	30	51	49	49	57
Tb927.7.6380	U4-specific Sm protein SSm4, SmD3 paralogue	RNA.processing	1377	693	2508	1933	2119	6383	4657	2246	41	25	66	68	80	80	82	98
Tb927.2.4840	Vitamin K epoxide reductase family, putative	ZUnknown	1378	1144	3682	2433	2425	6663	4844	3162	41	41	97	86	91	84	85	138
Tb927.3.1870	CHAP domain containing protein, putative	ZUnknown	1378	932	1403	963	1364	4161	3920	2328	41	34	37	34	51	52	69	101
Tb927.4.2320	hypothetical protein, conserved	ZUnknown	1378	1299	2813	1929	1599	4756	2702	1151	41	47	74	68	60	60	48	50
Tb927.11.8070	Domain of unknown function (DUF4539), putative	ZUnknown	1379	1001	2098	1647	1672	4549	3280	1652	41	36	55	58	63	57	58	72
Tb927.7.490	hypothetical protein, conserved, trypanosome-specific	ZUnknown	1379	1054	1658	1136	995	2722	1842	438	41	38	44	40	37	34	32	19
Tb927.1.4300	chaperone protein DNAj, putative	Chaperone	1382	836	945	576	794	1529	1346	312	41	30	25	20	30	19	24	14
Tb927.10.4810	hypothetical protein, conserved	ZUnknown	1382	883	2355	1782	2723	9296	6529	4699	41	32	62	63	103	117	115	205
Tb927.3.3890	hypothetical protein, conserved	Mito.pathway	1383	1246	3883	2926	1394	3520	2522	804	41	45	103	103	53	44	44	35
Tb927.6.2160	hypothetical protein, conserved	ZUnknown	1383	1216	3614	2656	3005	9034	7179	4670	41	44	96	93	113	113	126	203
Tb927.8.2300	hypothetical protein, conserved, no known domains	ZUnknown	1383	1298	2824	1801	2150	6660	4858	2087	41	47	75	63	81	84	86	91
Tb927.8.3210	hypothetical protein, conserved	ZUnknown	1383	1465	2525	1813	1614	4539	3526	1876	41	53	67	64	61	57	62	82
Tb927.10.12200	hypothetical protein, conserved	ZUnknown	1384	631	929	628	886	2742	2703	1025	41	23	25	22	33	34	48	45
Tb927.11.13890	RNA ligase asociated with SSU	Mito.pathway	1384	934	3273	2454	1924	5922	5123	3144	41	34	87	86	73	74	90	137
Tb927.11.8420	DnaJ domain containing protein, putative	ZUnknown	1384	976	2219	1613	1819	5232	4346	2351	41	35	59	57	69	66	77	102
Tb927.6.2870	hypothetical protein, conserved	ZUnknown	1384	1073	1427	903	1161	3634	3590	2233	41	39	38	32	44	46	63	97
Tb927.4.1040	hypothetical protein, conserved	ZUnknown	1385	1427	1796	1343	1650	5508	4091	2763	41	51	47	47	62	69	72	120
Tb927.8.2490	SET domain containing protein, putative	ZUnknown	1385	532	2896	2306	1850	5109	3662	1084	41	19	77	81	70	64	64	47
Tb927.9.10520	hypothetical protein, possible component of cytochorome oxidase complex	Mito.e.transport	1385	1142	4626	3555	2130	7001	5502	2715	41	41	122	125	80	88	97	118
Tb927.10.12060	hypothetical protein, conserved	ZUnknown	1386	455	206	144	239	433	425	149	41	16	5	5	9	5	7	6
Tb927.11.12960	hypothetical protein, conserved	ZUnknown	1387	1069	3677	2687	2504	7740	5738	3355	41	39	97	95	94	97	101	146
Tb927.3.2150	protein phosphatase 2C, putative	Protein.phosphatase	1387	1099	4314	3194	1671	4486	3171	833	41	40	114	112	63	56	56	36
Tb927.3.2000	RBP21	RNA.binding	1388	912	1964	1322	1621	4913	4296	2267	41	33	52	47	61	62	76	99
Tb927.3.610	N-acetyltransferase complex ARD1 subunit, putative	Enzyme	1388	1511	1609	1086	1114	3951	2930	1291	41	54	43	38	42	50	52	56
Tb927.11.13680	hypothetical protein, conserved	ZUnknown	1389	1360	2061	1412	1578	4402	3533	1350	41	49	54	50	59	55	62	59
Tb927.11.3350	MT1 phospholipid-transporting ATPase 1-like protein	Lipids	1389	602	122	88	123	242	278	57	41	22	3	3	5	3	5	2
Tb927.9.4080	hypothetical protein, conserved, DRBD3, 4E5/G1 interaction. P-loop NTP hydrolase (AAA ATPase), DNA ligase/capping enzyme catalytic domain, C4 zinc finger (LIM domain)	Translation	1389	484	199	96	244	379	387	113	41	17	5	3	9	5	7	5
Tb927.9.7710	hypothetical protein, conserved	ZUnknown	1389	882	2532	1954	2583	8137	6762	5015	41	32	67	69	97	102	119	218
Tb927.1.2970	hypothetical protein, conserved	ZUnknown	1390	832	1335	895	1613	5790	4545	2758	41	30	35	31	61	73	80	120
Tb927.10.7560	methyltransferase domain containing protein, putative	ZUnknown	1390	773	2165	1669	1685	5039	4110	2462	41	28	57	59	64	63	72	107
Tb927.11.10970	RWD domain/Uncharacterized protein family UPF0029, putative	ZUnknown	1390	475	1849	1343	1834	5486	4121	2318	41	17	49	47	69	69	73	101
Tb927.11.15410	hypothetical protein, conserved	ZUnknown	1390	991	1379	1084	1310	3638	3487	1096	41	36	36	38	49	46	61	48
Tb927.5.600	hypothetical protein, conserved	ZUnknown	1390	1572	2703	2492	2026	6234	3919	2225	41	57	71	88	76	78	69	97
Tb927.2.2460	SUMO-conjugating enzyme e2, UBC9	Ubiquitin.proteasome	1391	982	1210	960	643	1487	1215	243	42	35	32	34	24	19	21	11
Tb927.2.3420	hypothetical protein, conserved	ZUnknown	1391	1499	1694	1247	1469	4982	3527	1877	42	54	45	44	55	63	62	82
Tb927.9.12480	dynein light chain type 1, putative	ZUnknown	1391	1560	2269	1854	1553	5263	3467	1403	42	56	60	65	59	66	61	61
Tb927.10.11980	QA-SNARE protein putative	Vesicular.transport	1392	1108	1721	1357	1669	5543	4574	2731	42	40	45	48	63	70	81	119
Tb927.7.260	hypothetical protein, conserved	ZUnknown	1393	1334	2013	1615	1757	5664	4458	2932	42	48	53	57	66	71	79	128
Tb927.8.7810	hypothetical protein, conserved	ZUnknown	1393	1349	2389	1845	2405	8045	6286	4187	42	49	63	65	91	101	111	182
Tb927.6.600	CAF1	RNA.degradation	1394	1048	1623	867	1866	4414	2642	989	42	38	43	30	70	55	47	43
Tb927.10.10430	hypothetical protein, conserved	ZUnknown	1395	919	1508	1196	1200	3066	2512	912	42	33	40	42	45	39	44	40
Tb927.8.5520	hypothetical protein, conserved	ZUnknown	1396	1031	2389	1845	1877	5674	4060	1949	42	37	63	65	71	71	72	85
Tb927.9.14200	hypothetical protein, possible component of cytochorome oxidase complex	Mito.e.transport	1397	886	4058	2864	1197	2994	2503	907	42	32	107	101	45	38	44	40
Tb927.10.9760	alternative oxidase	Glucose.glycerol	1400	666	1382	1184	868	2139	1372	422	42	24	37	42	33	27	24	18
Tb927.11.3170	Der1-like family, putative	ZUnknown	1400	879	2490	1745	2148	6621	4078	1686	42	32	66	61	81	83	72	73
Tb927.3.3910	RNApol Rpc34 family, pol III subunit, likely homologue of yeast RPC34	RNA.synthesis	1400	834	1496	1483	1137	3212	2062	782	42	30	40	52	43	40	36	34
Tb927.10.1680	histone deacetylase 1 (DAC1 or HDAC1)	Chromatin	1401	787	1717	1247	1349	4160	3516	1821	42	28	45	44	51	52	62	79
Tb927.2.1740	hypothetical protein, conserved	ZUnknown	1401	1063	1571	1045	1452	4011	2855	883	42	38	42	37	55	50	50	38
Tb927.8.2410	amidase, putative	Protease	1401	537	3037	2195	2161	5907	4600	2152	42	19	80	77	81	74	81	94
Tb927.9.12280	hypothetical protein, conserved	ZUnknown	1403	1070	1928	1512	1862	5969	4927	3398	42	39	51	53	70	75	87	148
Tb927.10.11530	hypothetical protein, conserved	ZUnknown	1404	1265	2193	1668	1892	5074	3934	2634	42	46	58	59	71	64	69	115
Tb927.10.3290	hypothetical protein, conserved	ZUnknown	1404	1141	1969	1384	1431	4219	3909	1821	42	41	52	49	54	53	69	79
Tb927.3.3510	hypothetical protein, conserved	ZUnknown	1405	627	683	623	436	1129	736	328	42	23	18	22	16	14	13	14
Tb927.11.3180	hypothetical protein, conserved	ZUnknown	1406	771	1788	1239	2487	8041	6480	4296	42	28	47	44	94	101	114	187
Tb927.11.400	Protein of unknown function (DUF1308), putative	ZUnknown	1406	685	1107	817	698	1779	1587	373	42	25	29	29	26	22	28	16
Tb927.9.13150	TFIIF-stimulated CTD phosphatase, putative	Protein.phosphatase	1406	1482	3104	2411	1543	4823	3343	1370	42	53	82	85	58	61	59	60
Tb927.11.14490	RNA polymerase subunit, putative (RPB7)	RNA.synthesis	1407	1451	2887	2091	1697	5183	3783	1690	42	52	76	74	64	65	67	74
Tb927.11.6680	Polyamine transporter 2 (TbPOT2)	Amino.acid.transport	1407	655	4965	3272	1464	3244	3344	513	42	24	131	115	55	41	59	22
Tb927.11.15290	eRF1 methyltransferase catalytic subunit, putative	Translation	1408	533	2432	1713	1651	4406	3334	1313	42	19	64	60	62	55	59	57
Tb927.10.11650	hypothetical protein, conserved	ZUnknown	1410	1199	1715	1251	842	2231	1812	383	42	43	45	44	32	28	32	17
Tb927.10.13120	mitochondrial carrier protein, MCP14	Mito.transport	1411	1017	2491	1926	1602	4312	3163	1075	42	37	66	68	60	54	56	47
Tb927.11.14310	small nuclear ribonucleoprotein Sm-G	RNA.processing	1412	1457	2054	1273	1135	3089	2219	1130	42	53	54	45	43	39	39	49
Tb927.11.5460	hypothetical protein, conserved	ZUnknown	1412	1343	2023	1618	2038	6595	5585	3301	42	48	53	57	77	83	98	144
Tb927.11.6080	hypothetical protein, conserved	ZUnknown	1412	1131	1544	1157	1324	3851	3471	1352	42	41	41	41	50	48	61	59
Tb927.8.6370	hypothetical protein, conserved	ZUnknown	1412	963	821	581	503	1150	923	158	42	35	22	20	19	14	16	7
Tb927.8.6630	hypothetical protein	ZUnknown	1412	1130	1821	1201	1463	3758	2716	761	42	41	48	42	55	47	48	33
Tb927.8.7180	hypothetical protein, conserved	ZUnknown	1412	1197	1887	1384	1970	5841	5057	3067	42	43	50	49	74	73	89	134
Tb927.10.8010	hypothetical protein, conserved	ZUnknown	1413	1129	3089	2155	2307	7015	5317	3546	42	41	82	76	87	88	94	154
Tb927.9.3540	hypothetical protein, conserved	Mito.pathway	1414	1169	3785	2852	2543	8368	5553	3207	42	42	100	100	96	105	98	140
Tb927.5.3680	GPI-GlcNAc transferase complex, PIG-H component, putative	ZUnknown	1415	943	3117	2080	1893	5285	4043	2615	42	34	82	73	71	66	71	114
Tb927.7.2730	leucine-rich repeat protein (LRRP)	LRRP	1415	1482	1789	1193	1430	4575	3027	1528	42	53	47	42	54	57	53	67
Tb927.8.1030	chaperone protein DNAj, putative	Chaperone	1415	924	1921	1632	1337	3233	2129	489	42	33	51	57	50	41	37	21
Tb927.10.12790	hypothetical protein	ZUnknown	1416	1064	160	94	460	1239	1275	236	42	38	4	3	17	16	22	10
Tb927.3.3990	KREPB6	Mito.RNA	1416	1079	1737	1106	1344	3742	3551	1568	42	39	46	39	51	47	63	68
Tb927.4.2520	NAD dependent deacetylase SIR2RP3, nicotinic acid mononucleotide 5,6-dimethylbenzimidazole (cobb) protein	Mito.pathway	1416	809	904	723	931	2561	1919	963	42	29	24	25	35	32	34	42
Tb927.10.10440	mitochondrial carrier protein, MCP8	Mito.transport	1417	797	2727	1970	3059	7946	5817	2625	42	29	72	69	115	100	102	114
Tb927.7.630	hypothetical protein, conserved	ZUnknown	1418	1255	4395	3202	2658	8543	5694	3414	42	45	116	113	100	107	100	149
Tb927.9.11820	CRAL/TRIO domain containing protein, putative	ZUnknown	1418	883	3747	2419	1590	4590	3765	1759	42	32	99	85	60	58	66	77
Tb927.11.5710	chaperone protein DNAj, putative	Chaperone	1419	1042	959	670	902	2703	2006	562	42	38	25	24	34	34	35	24
Tb927.11.14870	NAD synthase, putative	Enzyme	1422	1577	3056	2143	2034	6382	4246	1812	42	57	81	75	77	80	75	79
Tb927.11.480	small GTP-binding protein domain containing protein, putative	ZUnknown	1423	1278	2264	1474	1773	5040	4386	2210	42	46	60	52	67	63	77	96
Tb927.6.3080	hypothetical protein	ZUnknown	1425	1129	2218	1586	2312	7436	5563	2589	43	41	59	56	87	93	98	113
Tb927.11.15630	NOL1/NOP2/sun family, putative	ZUnknown	1430	635	2116	1608	1290	3632	2406	614	43	23	56	57	49	46	42	27
Tb927.7.200	hypothetical protein, conserved	ZUnknown	1430	1071	1376	839	1060	3102	2641	1234	43	39	36	30	40	39	47	54
Tb927.11.11390	2OG-Fe(II) oxygenase superfamily, putative	ZUnknown	1431	911	2096	1985	1296	3103	1753	521	43	33	55	70	49	39	31	23
Tb927.11.5830	YL1 nuclear protein, putative	ZUnknown	1432	938	970	742	586	1740	1374	434	43	34	26	26	22	22	24	19
Tb927.5.3760	SPO11 meiotic recombination protein	DNA	1433	1045	1267	866	1053	2821	2612	756	43	38	33	30	40	35	46	33
Tb927.8.5610	hypothetical protein, conserved	ZUnknown	1433	745	1433	1270	1044	2978	1848	570	43	27	38	45	39	37	33	25
Tb927.6.2950	hypothetical protein	ZUnknown	1435	1357	1890	1505	1853	5997	5182	3159	43	49	50	53	70	75	91	138
Tb927.11.4370	hypothetical protein, conserved	ZUnknown	1436	686	2204	1503	1863	6021	4696	2550	43	25	58	53	70	76	83	111
Tb927.10.7000	hypothetical protein, conserved	ZUnknown	1437	1002	1921	1327	1141	3495	2275	471	43	36	51	47	43	44	40	21
Tb927.9.12080	hypothetical protein, conserved	ZUnknown	1437	1254	1961	1364	1764	5501	4455	2255	43	45	52	48	66	69	78	98
Tb927.10.11950	Putative Cwc15, copurified with splicing complex	RNA.processing	1439	1308	1448	1120	1641	4578	3932	2046	43	47	38	39	62	58	69	89
Tb927.10.5870	hypothetical protein, conserved	ZUnknown	1439	1100	1354	1108	1022	2402	1499	229	43	40	36	39	39	30	26	10
Tb927.4.1400	vacuolar transport protein 4A, putative	Lysosome	1439	898	894	703	1282	3537	2944	560	43	32	24	25	48	44	52	24
Tb927.3.3470	cytochrome b5, putative (CYB5)	Mito.e.transport	1440	896	980	714	1048	2506	2485	1043	43	32	26	25	39	31	44	45
Tb927.11.2160	hypothetical protein, conserved	ZUnknown	1441	1126	3957	2833	2490	6769	5127	2240	43	41	105	100	94	85	90	98
Tb927.11.4590	hypothetical protein, conserved	ZUnknown	1441	1460	1791	1380	1561	4543	3844	2040	43	53	47	49	59	57	68	89
Tb927.7.4860	KKT13 Kinetochore protein	Cell.cycle	1441	1104	845	647	449	1047	751	194	43	40	22	23	17	13	13	8
Tb927.8.7710	hypothetical protein, conserved	ZUnknown	1441	1390	1712	1135	1198	3111	3386	1501	43	50	45	40	45	39	60	65
Tb927.11.2930	hypothetical protein, conserved	ZUnknown	1442	1195	18624	14506	8270	26366	14100	6176	43	43	492	510	312	331	248	269
Tb927.11.6750	DNA ligase, putative	DNA	1442	630	2500	2008	1527	3737	2501	821	43	23	66	71	58	47	44	36
Tb927.9.4760	Protein of unknown function (DUF3128), putative	ZUnknown	1442	714	1734	1323	1439	4076	2853	1100	43	26	46	47	54	51	50	48
Tb927.11.16390	(CKS1 cyclin dependent kinases regulatory subunit, putative	Cell.cycle	1443	1323	1030	853	934	2735	2490	1220	43	48	27	30	35	34	44	53
Tb927.10.15690	anaphase promoting complex, subunit 10-like protein	Cell.cycle	1444	1099	2165	1600	1996	6765	5781	3417	43	40	57	56	75	85	102	149
Tb927.10.11920	hypothetical protein, conserved, no clear yeast or human matches	ZUnknown	1445	582	3352	2654	3464	12346	10420	8721	43	21	89	93	131	155	184	380
Tb927.5.4360	hypothetical protein, conserved	ZUnknown	1445	1073	2474	1653	1877	5598	4307	2728	43	39	65	58	71	70	76	119
Tb927.7.5710	hypothetical protein, conserved	ZUnknown	1445	992	2152	1522	1432	4350	3666	1919	43	36	57	54	54	55	65	84
Tb927.10.15610	zinc finger protein, putative	Zinc.finger	1448	672	408	257	397	792	777	226	43	24	11	9	15	10	14	10
Tb927.11.14280	septum formation protein MAF homologue, putative	ZUnknown	1448	1049	657	425	724	2152	1464	462	43	38	17	15	27	27	26	20
Tb927.4.890	small nuclear ribonucleoprotein SmD3, in U2	RNA.processing	1448	1581	2297	1702	1307	3349	2484	914	43	57	61	60	49	42	44	40
Tb927.5.2740	TBC-F likely GAP	Signalling	1448	2425	2176	1241	2063	6158	5992	2014	43	87	58	44	78	77	106	88
Tb927.5.3300	hypothetical protein, conserved	Mito.pathway	1448	965	2393	1807	1461	3860	2418	414	43	35	63	64	55	48	43	18
Tb927.8.5040	EMG1/NEP1 methyltransferase, putative	ZUnknown	1448	1265	3090	2364	1334	3041	2388	810	43	46	82	83	50	38	42	35
Tb927.9.4570	hypothetical protein, conserved	ZUnknown	1450	1166	2266	1815	1531	3914	2666	916	43	42	60	64	58	49	47	40
Tb927.7.3290	WD domain, G-beta repeat, putative	ZUnknown	1452	581	2534	1857	1623	3925	3092	1196	43	21	67	65	61	49	54	52
Tb927.3.2370	hypothetical protein, conserved	Mito.pathway	1453	1221	4559	3347	2665	7735	6835	3958	43	44	121	118	100	97	120	172
Tb927.3.5300	hypothetical protein, conserved, sigpep, no domains	ZUnknown	1453	1204	3432	2691	2544	7187	5699	2459	43	43	91	95	96	90	100	107
Tb927.5.2620	hypothetical protein, conserved, ubiquitin-like C-terminus, no yeast or human match	ZUnknown	1453	2039	2427	1295	2295	5125	3976	658	43	74	64	46	86	64	70	29
Tb927.10.13300	Mitchondrial SSU ribosomal S8, putative	Mito.translation	1454	999	3635	2452	2110	5965	4445	2295	43	36	96	86	80	75	78	100
Tb927.11.13410	hypothetical protein, conserved	ZUnknown	1454	753	983	775	673	1705	1526	503	43	27	26	27	25	21	27	22
Tb927.1.630	anti-silencing protein ASF1A	Chromatin	1455	1152	1312	911	837	2403	1969	594	43	42	35	32	32	30	35	26
Tb927.11.8910	NADH dehydrogenase subunit NB6M, putative	Mito.e.transport	1455	695	4021	2955	2341	5848	3288	838	43	25	106	104	88	73	58	37
Tb927.8.5860	Mitchondrial LSU ribosomal protein 50S ribosomal protein L17, putative	Mito.translation	1457	1204	3461	2748	2000	5573	3799	926	43	43	91	97	75	70	67	40
Tb927.10.12000	iron-sulfur cluster assembly protein, ISD11, needed foraconitatase, fumarase & thiolation of mitochodrial and cytosolic tRNA	Mito.pathway	1458	1249	3474	2453	2209	6508	4673	2278	44	45	92	86	83	82	82	99
Tb927.1.3040	hypothetical protein, conserved	ZUnknown	1459	602	2858	2157	2061	5825	4775	1804	44	22	76	76	78	73	84	79
Tb927.10.6650	G10 protein homologue, putative	ZUnknown	1460	973	1515	1126	1966	5977	3855	1599	44	35	40	40	74	75	68	70
Tb927.11.9970	Small acidic protein family, putative	ZUnknown	1461	773	1562	1223	946	2728	1906	626	44	28	41	43	36	34	34	27
Tb927.11.5980	conserved protein	ZUnknown	1462	979	1967	1386	1270	3276	2383	989	44	35	52	49	48	41	42	43
Tb927.6.2220	hypothetical protein, conserved	ZUnknown	1463	1061	2452	1859	1997	7187	5421	3413	44	38	65	65	75	90	95	149
Tb927.11.3800	hypothetical protein, conserved	ZUnknown	1465	1062	1426	1046	2207	6905	4574	2489	44	38	38	37	83	87	81	108
Tb927.4.4770	hypothetical protein	ZUnknown	1465	1422	2221	1586	1790	5047	4318	2424	44	51	59	56	67	63	76	106
Tb927.10.10180	Miro-like protein, putative	ZUnknown	1466	787	2063	1490	2186	6436	4944	2086	44	28	55	52	82	81	87	91
Tb927.11.1240	hypothetical protein, conserved	ZUnknown	1466	1039	1680	1157	1436	4432	3791	1915	44	37	44	41	54	56	67	83
Tb927.11.4260	Protein of unknown function, DUF607, putative	ZUnknown	1466	1450	1555	1334	1749	6118	4648	2639	44	52	41	47	66	77	82	115
Tb927.4.4720	KRIPP7/TbPPR7 Kinetoplast ribosomal PPR-repeat containing protein	Mito.translation	1466	520	1079	891	989	2682	1868	439	44	19	29	31	37	34	33	19
Tb927.11.13330	hypothetical protein, conserved	ZUnknown	1467	1216	1822	1273	1460	4754	3727	2146	44	44	48	45	55	60	66	93
Tb927.5.480	hypothetical protein, conserved	ZUnknown	1467	1148	2035	1349	1911	5119	3785	1393	44	41	54	47	72	64	67	61
Tb927.7.7230	nitroreductase (NTR)	Enzyme	1467	1000	1454	1291	828	2408	1571	434	44	36	38	45	31	30	28	19
Tb927.1.4160	hypothetical protein, conserved	ZUnknown	1468	1023	2755	2057	1647	4456	3068	1452	44	37	73	72	62	56	54	63
Tb927.11.350	RNA-binding protein, putative	ZUnknown	1468	1155	2387	1836	1323	3513	2563	748	44	42	63	65	50	44	45	33
Tb927.9.10080	phosphatidylserine decarboxylase, putative	Lipids	1468	829	2541	1809	1708	4513	3926	1651	44	30	67	64	64	57	69	72
Tb927.10.15210	nuclear cap binding complex subunit CBP30	Nuclear.transport	1470	1088	1415	974	1314	3251	2595	977	44	39	37	34	50	41	46	43
Tb927.10.15770	hypothetical protein, conserved	ZUnknown	1470	586	325	283	255	759	650	245	44	21	9	10	10	10	11	11
Tb927.11.6010	conserved protein, unknown function	ZUnknown	1470	1131	2517	2095	2146	6653	5075	2673	44	41	67	74	81	84	89	116
Tb927.9.12040	MT57 or MTr3 cap methyltransferase	RNA.processing	1470	768	1035	845	714	1608	1199	263	44	28	27	30	27	20	21	11
Tb927.6.2670	NUDIX hydrolase, conserved, has mRNA decapping activity in vitro	Enzyme	1472	1186	1252	781	858	2506	2458	1280	44	43	33	27	32	31	43	56
Tb927.8.7510	p-nitrophenylphosphatase, putative	Enzyme	1472	549	2194	1695	1942	4919	3465	1195	44	20	58	60	73	62	61	52
Tb927.10.9920	hypothetical protein, conserved	ZUnknown	1475	1203	3728	2284	1890	5154	3902	954	44	43	99	80	71	65	69	42
Tb927.4.930	Mitchondrial LSU ribosomal protein L14, putative	Mito.translation	1475	816	3224	2532	2687	8454	7062	4963	44	29	85	89	101	106	124	216
Tb927.6.2410	hypothetical protein, conserved	ZUnknown	1475	1137	2184	1677	2510	8193	7241	5142	44	41	58	59	95	103	128	224
Tb927.11.3750	NADH-cytochrome b5 reductase, putative (B5R)	Mito.e.transport	1478	863	3725	2974	1671	4477	2819	740	44	31	98	105	63	56	50	32
Tb927.11.570	DnaJ domain containing protein, putative	Mito.pathway	1478	885	3934	2953	1972	5509	4055	1603	44	32	104	104	74	69	71	70
Tb927.3.4640	POMP26	Mito.membrane	1478	1589	1807	1222	1574	3875	3332	1323	44	57	48	43	59	49	59	58
Tb927.4.2750	hypothetical protein, conserved	ZUnknown	1478	1097	784	503	679	1452	1300	265	44	40	21	18	26	18	23	12
Tb927.10.5110	KREPA4	Mito.RNA	1479	1161	2011	1551	1501	3985	3629	1540	44	42	53	55	57	50	64	67
Tb927.11.7390	hypothetical protein, conserved, extremely weak but blast-back positive match to yeast PDH1 which may participate in conversion of 2-methylcitrate to 2-methylisocitrate	Enzyme	1479	1093	5210	3571	2875	8817	6811	2865	44	39	138	126	108	111	120	125
Tb927.7.850	hypothetical protein, conserved	ZUnknown	1479	1047	3755	2553	2585	7508	5911	2580	44	38	99	90	97	94	104	112
Tb927.10.3700	AMPKgamma	Protein.kinase	1481	934	1101	620	819	1873	1770	513	44	34	29	22	31	24	31	22
Tb927.7.1790	Adenine phosphoribosyltransferase, putative	Nucleotides	1481	908	6235	4584	3209	9786	6146	1871	44	33	165	161	121	123	108	82
Tb927.10.1750	hypothetical protein, conserved	ZUnknown	1482	869	1881	1429	1781	4738	3031	1029	44	31	50	50	67	60	53	45
Tb927.2.4240	GTP binding protein, putative	Mito.pathway	1482	1098	2838	1723	1371	3907	3625	1250	44	40	75	61	52	49	64	54
Tb927.5.3060	hypothetical protein, conserved	ZUnknown	1482	917	1928	1457	1073	2814	2296	763	44	33	51	51	40	35	40	33
Tb927.10.11070	hypothetical protein, conserved	ZUnknown	1483	858	2081	1349	1768	5006	3814	1756	44	31	55	47	67	63	67	76
Tb927.4.3650	serine threonine-protein phosphatase PP1, putative	ZUnknown	1483	1381	3044	2181	2610	8207	6067	3866	44	50	80	77	98	103	107	168
Tb927.9.10680	RNA polymerase III RPC4, putative	ZUnknown	1484	1098	1434	990	1220	3276	2329	604	44	40	38	35	46	41	41	26
Tb927.4.3720	Uncharacterized conserved protein (DUF2039), putative	ZUnknown	1485	1078	1870	1375	1476	4217	3375	1646	44	39	49	48	56	53	59	72
Tb927.9.14040	short-chain dehydrogenase, putative	Enzyme	1485	645	1091	772	741	1815	1039	298	44	23	29	27	28	23	18	13
Tb927.11.16350	hypothetical protein, conserved	ZUnknown	1486	1476	2010	1489	1242	3643	2890	1013	44	53	53	52	47	46	51	44
Tb927.9.1660	hypothetical protein, conserved	ZUnknown	1486	727	1933	1445	1674	5339	4355	2303	44	26	51	51	63	67	77	100
Tb927.2.5260	hypothetical protein, conserved	ZUnknown	1487	1128	2058	1549	1747	5494	4446	2097	44	41	54	54	66	69	78	91
Tb927.8.4490	hypothetical protein	ZUnknown	1487	1007	1659	1166	1117	2931	2797	551	44	36	44	41	42	37	49	24
Tb927.1.1680	Transcription elongation factor 1 domain-containing protein	RNA.synthesis	1488	1429	2688	1970	1985	5820	4512	2050	44	52	71	69	75	73	79	89
Tb927.4.1130	Complex 1 protein (LYR family), putative	Mito.pathway	1488	800	2103	1584	1780	5225	3602	1514	44	29	56	56	67	66	63	66
Tb927.4.820	TFIIF-stimulated CTD phosphatase, putative	Protein.phosphatase	1488	614	1698	1244	1159	2856	2250	891	44	22	45	44	44	36	40	39
Tb927.8.720	Domain of unknown function DUF59, putative	ZUnknown	1488	1296	2841	2259	2195	7563	4858	2669	44	47	75	79	83	95	86	116
Tb927.7.2600	class I transcription factor A, subunit 7 (CITFA-7)	RNA.synthesis	1490	948	2599	1886	2279	6643	4823	2115	44	34	69	66	86	83	85	92
Tb927.10.10320	dynein light chain, putative,dynein Tctex1 family, putative	Cytoskeleton	1491	1077	2285	1737	2634	8189	5428	3703	44	39	60	61	99	103	96	161
Tb927.8.5890	Anti-silencing function ASF1B	Chromatin	1492	1217	2639	2012	2125	7251	5598	3273	45	44	70	71	80	91	99	143
Tb927.10.1830	syntaxin, putative	Vesicular.transport	1493	672	2634	2191	2404	7715	5981	3258	45	24	70	77	91	97	105	142
Tb927.2.2970	mitochondrial carrier protein, MCP13	Mito.transport	1497	1117	2312	1807	795	1726	1469	365	45	40	61	64	30	22	26	16
Tb927.10.5760	adenylate kinase, glycosomal (ADKD)	Nucleotides	1498	1274	3606	2504	1597	3648	3088	951	45	46	95	88	60	46	54	41
Tb927.10.9980	hypothetical protein, conserved	ZUnknown	1498	761	1449	1073	1464	4422	4811	2243	45	27	38	38	55	56	85	98
Tb927.4.1190	LicD family, putative	ZUnknown	1498	978	1735	1228	1944	6224	4120	2358	45	35	46	43	73	78	73	103
Tb927.6.4580	Mitchondrial SSU ribosomal protein	Mito.translation	1498	1073	3862	2810	2562	9176	6760	5282	45	39	102	99	97	115	119	230
Tb927.11.5870	hypothetical protein, conserved	ZUnknown	1499	956	1436	1085	1035	2377	1890	493	45	34	38	38	39	30	33	21
Tb927.6.4030	superoxide dismutase, putative	Redox	1500	1290	3829	2923	2614	7982	5806	3157	45	47	101	103	99	100	102	138
Tb927.6.4060	Eukaryotic protein of unknown function (DUF872), putative	ZUnknown	1500	1206	1607	1218	2336	7234	5238	3450	45	43	42	43	88	91	92	150
Tb927.10.5650	hypothetical protein, conserved	ZUnknown	1501	1397	1242	854	1492	4575	3718	1126	45	50	33	30	56	57	65	49
Tb927.3.1890	cytochrome c oxidase assembly protein, putative	Mito.pathway	1505	1190	3957	2806	1964	5197	3018	871	45	43	105	99	74	65	53	38
Tb927.4.480	Cullin binding, putative	Ubiquitin.proteasome	1505	1597	1250	954	1228	3348	2684	1284	45	58	33	34	46	42	47	56
Tb927.11.5090	aspartate aminotransferase, mitochondrial	Amino.acids	1506	1177	2786	1481	1340	2991	2336	652	45	42	74	52	51	38	41	28
Tb927.3.4590	hypothetical protein, conserved	ZUnknown	1506	773	817	541	566	926	912	266	45	28	22	19	21	12	16	12
Tb927.8.3130	S-adenosyl-methyltransferase mraW-like protein, putative	Amino.acids	1506	686	833	662	613	1620	1082	389	45	25	22	23	23	20	19	17
Tb927.6.3730	chaperone protein DNAj, putative	Chaperone	1507	1526	1337	929	1364	4305	4125	2529	45	55	35	33	51	54	73	110
Tb927.11.10140	hypothetical protein, possible component of cytochorome oxidase complex	Mito.e.transport	1508	1391	5731	4287	2452	6963	5547	2604	45	50	152	151	92	87	98	113
Tb927.3.5190	hypothetical protein, conserved	ZUnknown	1509	872	2069	1113	1423	3254	2414	829	45	31	55	39	54	41	43	36
Tb927.5.2880	chaperone protein DNAj, putative	Chaperone	1509	1083	1591	1120	1677	5565	4472	2147	45	39	42	39	63	70	79	94
Tb927.6.1690	AUT2/APG4/ATG4 cysteine peptidase, putative, (ATG4.2)	Lysosome	1511	1049	1535	1049	1550	4994	4608	2567	45	38	41	37	58	63	81	112
Tb927.11.1000	kinetoplastid kinetochore protein 16	Cell.cycle	1512	1401	2599	2185	2554	8004	6737	4604	45	51	69	77	96	101	119	201
Tb927.4.4990	ubiquinol-cytochrome c reductase, putative	Mito.e.transport	1512	1085	10406	8529	5727	20430	11970	5666	45	39	275	300	216	257	211	247
Tb927.11.9990	glycosyl transferase-like protein	Glycans	1513	942	1904	1374	1248	3061	2763	1012	45	34	50	48	47	38	49	44
Tb927.2.4440	hypothetical protein	ZUnknown	1513	1375	3234	1980	2004	5552	4122	2095	45	50	85	70	76	70	73	91
Tb927.8.3140	NAD dependent deacetylase, putative, SIR2RP2	Mito.pathway	1513	850	1671	1230	1626	4770	3313	1895	45	31	44	43	61	60	58	83
Tb927.8.7770	aldehyde dehydrogenase family, putative	ZUnknown	1513	734	2655	1929	1538	3464	2252	457	45	26	70	68	58	44	40	20
Tb927.11.8750	hypothetical protein, conserved	ZUnknown	1515	1089	1692	1364	1803	6235	5411	3285	45	39	45	48	68	78	95	143
Tb927.6.4040	Mitchondrial LSU ribosomal protein	Mito.translation	1515	1330	4965	3621	3246	9811	6379	3297	45	48	131	127	122	123	112	144
Tb927.11.16590	RBP37	RNA.binding	1516	693	959	673	653	1415	1234	379	45	25	25	24	25	18	22	17
Tb927.4.850	hypothetical protein, conserved	ZUnknown	1516	1464	1999	1527	1854	5653	4456	2185	45	53	53	54	70	71	78	95
Tb927.11.2410	Flabarin, flagellar membrane protein in Leishmania & tryps	Cytoskeleton	1518	1071	30700	20969	6820	20716	18237	5373	45	39	812	738	257	260	321	234
Tb927.5.3640	Mitchondrial SSU ribosomal protein	Mito.translation	1518	1085	2471	1866	1627	4687	3757	1386	45	39	65	66	61	59	66	60
Tb927.11.10740	vacuolar sorting-associated protein-like, putative	Lysosome	1520	1297	1275	1108	1081	4072	3715	1635	45	47	34	39	41	51	65	71
Tb927.7.4430	hypothetical protein, conserved, no yeast or human match	ZUnknown	1520	1353	2711	1916	1826	4763	4055	1781	45	49	72	67	69	60	71	78
Tb927.7.1490	hypothetical protein, conserved	ZUnknown	1521	1173	2557	1680	1611	4756	3730	1834	45	42	68	59	61	60	66	80
Tb927.11.310	hypothetical protein, conserved	ZUnknown	1522	1337	777	507	877	2527	2475	693	45	48	21	18	33	32	44	30
Tb927.2.5230	protein kinase, putative	Protein.kinase	1522	560	2703	2030	1896	5354	3130	1079	45	20	71	71	71	67	55	47
Tb927.7.4850	KKT5 Kinetochore protein	Cell.cycle	1523	1462	2212	1679	2053	6648	5800	2326	45	53	58	59	77	84	102	101
Tb927.10.3070	hypothetical protein, conserved	ZUnknown	1524	1522	2973	2082	2053	6531	4500	2026	45	55	79	73	77	82	79	88
Tb927.6.4530	RBP17	RNA.binding	1524	1199	2688	1956	1663	4607	4493	2089	45	43	71	69	63	58	79	91
Tb927.3.5600	hypothetical protein, conserved	ZUnknown	1526	1257	2440	1697	2021	5974	4635	2616	46	45	65	60	76	75	82	114
Tb927.5.1050	hypothetical protein	ZUnknown	1526	1128	2584	1894	1317	3550	2256	611	46	41	68	67	50	45	40	27
Tb927.5.1590	hypothetical protein, conserved	ZUnknown	1526	1450	2673	1929	2175	6769	5620	2763	46	52	71	68	82	85	99	120
Tb927.8.1000	hypothetical protein, conserved	ZUnknown	1526	1196	1320	938	976	2331	2143	772	46	43	35	33	37	29	38	34
Tb927.8.4550	Mitchondrial SSU ribosomal protein	Mito.translation	1526	1798	2371	1764	2363	6993	5626	4021	46	65	63	62	89	88	99	175
Tb927.9.10560	POMP6/TbLOK1	Mito.membrane	1528	1619	4874	3241	2043	6444	4434	2327	46	58	129	114	77	81	78	101
Tb927.10.5060	Protein of unknown function (DUF3592), putative	ZUnknown	1529	1279	2102	1499	1771	5552	4635	3283	46	46	56	53	67	70	82	143
Tb927.11.13710	hypothetical protein, conserved	Mito.pathway	1530	1228	4909	3955	3539	11583	8025	5391	46	44	130	139	133	145	141	235
Tb927.8.1790	hypothetical protein, conserved	ZUnknown	1530	1151	7105	5988	2437	6043	3390	748	46	41	188	211	92	76	60	33
Tb927.10.4250	ADP-ribosylation factor-like 2, arl2 (ARL2)	Vesicular.transport	1531	1395	2145	1607	1653	5145	4133	2360	46	50	57	57	62	65	73	103
Tb927.7.5510	hypothetical protein, conserved	ZUnknown	1531	900	1567	1119	1225	3096	2714	932	46	32	41	39	46	39	48	41
Tb927.10.11820	Mitchondrial SSU ribosomal protein	Mito.translation	1533	1225	1561	1168	1017	2704	2000	495	46	44	41	41	38	34	35	22
Tb927.3.2640	hypothetical protein, conserved	ZUnknown	1534	960	1327	969	1336	3661	3468	1658	46	35	35	34	50	46	61	72
Tb927.6.4730	hypothetical protein	ZUnknown	1534	895	919	574	700	1536	1239	419	46	32	24	20	26	19	22	18
Tb927.10.16020	pre-RNA processing PIH1/Nop17, putative	ZUnknown	1535	1032	1475	1035	1172	4096	3542	1703	46	37	39	36	44	51	62	74
Tb927.3.1260	hypothetical protein, conserved	ZUnknown	1535	1654	2416	1798	2179	7014	5276	3331	46	60	64	63	82	88	93	145
Tb927.7.1720	NFU1	Mito.pathway	1538	1461	2013	1425	1509	4355	3765	1872	46	53	53	50	57	55	66	82
Tb927.9.6660	hypothetical protein, conserved	ZUnknown	1538	871	1581	1082	1325	3599	2891	888	46	31	42	38	50	45	51	39
Tb927.11.3340	RBP34	RNA.binding	1539	826	2540	2010	2757	8735	5148	3696	46	30	67	71	104	110	91	161
Tb927.3.2720	hypothetical protein	ZUnknown	1539	1389	1301	862	1385	4460	2827	1471	46	50	34	30	52	56	50	64
Tb927.4.3730	hypothetical protein, conserved	ZUnknown	1539	1242	2454	1760	1859	5908	4782	2897	46	45	65	62	70	74	84	126
Tb927.2.4150	hypothetical protein, conserved	ZUnknown	1540	1274	1069	817	898	2733	2442	929	46	46	28	29	34	34	43	40
Tb927.4.3340	hypothetical protein, conserved, in MCM-BP-TAP	ZUnknown	1540	1148	2810	1809	1580	3864	3881	1367	46	41	74	64	60	49	68	60
Tb927.3.2860	hypothetical protein, conserved	ZUnknown	1542	1362	2840	2198	2476	7253	5150	2558	46	49	75	77	93	91	91	111
Tb927.8.2470	hypothetical protein, conserved	Mito.pathway	1542	1137	7299	6128	3749	14245	8594	3718	46	41	193	216	141	179	151	162
Tb927.8.4140	hypothetical protein, conserved	ZUnknown	1543	819	760	686	849	2538	1614	249	46	30	20	24	32	32	28	11
Tb927.11.11150	U5 snRNP-specific 40 kDa protein U5-40K	RNA.processing	1544	1378	2157	1414	1514	4365	3630	1701	46	50	57	50	57	55	64	74
Tb927.8.6080	POMP42, Glycerophosphoryl diester phosphodiesterase family	Mito.pathway	1544	1374	4011	2536	1595	4097	3341	834	46	50	106	89	60	51	59	36
Tb927.11.13760	hypothetical protein, conserved	ZUnknown	1545	1542	3077	2326	2206	6864	5086	3596	46	56	81	82	83	86	90	157
Tb927.2.5040	MORN repeat, putative	ZUnknown	1545	877	1581	1304	1159	2661	2007	564	46	32	42	46	44	33	35	25
Tb927.10.6020	hypothetical protein, conserved	ZUnknown	1546	1808	3077	2756	2877	8920	5831	3591	46	65	81	97	108	112	103	156
Tb927.4.990	hypothetical protein, conserved	ZUnknown	1546	881	1363	957	1071	2626	2349	874	46	32	36	34	40	33	41	38
Tb927.9.1470	hypothetical protein, conserved	ZUnknown	1546	1549	4571	3562	2917	9122	6490	4187	46	56	121	125	110	115	114	182
Tb927.11.4670	hypothetical protein, conserved	ZUnknown	1548	1332	1767	1321	2120	6247	4434	2986	46	48	47	46	80	78	78	130
Tb927.7.1800	hypothetical protein, conserved	ZUnknown	1549	1406	4682	3687	3010	9364	6929	4045	46	51	124	130	113	118	122	176
Tb927.10.3150	N-acetyltransferase, putative	Enzyme	1551	1610	2184	1600	1369	4414	3569	1456	46	58	58	56	52	55	63	63
Tb927.7.2680	ZC3H22	RNA.binding	1552	558	504	322	278	467	409	66	46	20	13	11	10	6	7	3
Tb927.1.840	transmembrane protein, putative	Mito.pathway	1555	1083	3382	2365	2577	7606	5547	3001	46	39	89	83	97	96	98	131
Tb927.11.10080	Mitchondrial LSU ribosomal protein	Mito.translation	1555	1344	2906	2473	2723	8254	7072	4713	46	48	77	87	103	104	125	205
Tb927.11.16490	MTAP associated with MTr1 cap methyltransferase	RNA.processing	1555	960	1232	962	1002	2321	1780	423	46	35	33	34	38	29	31	18
Tb927.10.2800	Mitchondrial SSU ribosomal protein	Mito.translation	1556	1600	3077	2287	1895	6264	4426	2082	46	58	81	80	71	79	78	91
Tb927.3.4020	PI4 kinase	Signalling	1556	237	481	411	654	1812	1126	375	46	9	13	14	25	23	20	16
Tb927.5.1260	Sulfate transporter N-terminal domain with GLY motif/Sulfate transporter family, putative	ZUnknown	1556	1038	1123	633	844	1821	1308	547	46	37	30	22	32	23	23	24
Tb927.9.8240	hypothetical protein, conserved, no good matches	ZUnknown	1556	1431	1572	986	1339	3677	2616	611	46	52	42	35	50	46	46	27
Tb927.3.4930	hypothetical protein, conserved	ZUnknown	1557	926	2559	1818	1848	5910	4752	3172	46	33	68	64	70	74	84	138
Tb927.9.10580	3-demethylubiquinone-9 3-methyltransferase, putative	Enzyme	1557	1442	2927	2023	1944	5746	4673	2367	46	52	77	71	73	72	82	103
Tb927.10.2670	hypothetical protein, conserved	ZUnknown	1558	1166	1839	1378	1595	5248	3691	1839	46	42	49	48	60	66	65	80
Tb927.10.7450	RRP41A exosome complex PH subunit	RNA.degradation	1558	1033	2498	1864	1881	5666	4421	2987	46	37	66	66	71	71	78	130
Tb927.11.580	lipid-like atypical dual specificity phosphatase, putative	Lipids	1558	1068	1508	1097	1273	4450	3656	2185	46	39	40	39	48	56	64	95
Tb927.3.1980	hypothetical protein, conserved	ZUnknown	1558	1006	1683	1175	1412	4255	3697	1784	46	36	44	41	53	53	65	78
Tb927.6.2130	nuclear movement protein, putative	ZUnknown	1558	1183	2119	1438	1983	6428	5063	3374	46	43	56	51	75	81	89	147
Tb927.9.5800	hypothetical protein, conserved	ZUnknown	1558	1612	3200	2458	2407	8445	6161	3609	46	58	85	86	91	106	109	157
Tb927.8.1310	mitochondrial carrier protein, MCP15	Mito.transport	1560	1144	2250	1619	1178	3067	2483	645	47	41	59	57	44	39	44	28
Tb927.11.8100	Ankyrin repeats (3 copies), putative	ZUnknown	1561	799	3867	2735	2821	8558	6124	3259	47	29	102	96	106	107	108	142
Tb927.3.1000	frataxin	Mito.pathway	1561	1440	2431	1829	1548	4381	3379	1429	47	52	64	64	58	55	60	62
Tb927.10.3860	SNF-7-like protein, putative	DNA	1562	1659	2766	2086	2751	8360	6230	3089	47	60	73	73	104	105	110	135
Tb927.9.9120	tRNA (guanine-N(7)-)-methyltransferase, putative,methyltransferase, putative	rRNA.tRNA.process	1562	1498	3246	2265	2422	7518	5385	3010	47	54	86	80	91	94	95	131
Tb927.10.15950	TATA-box-binding protein TBP or TRF4	RNA.synthesis	1564	1146	1193	973	1157	3213	2742	910	47	41	32	34	44	40	48	40
Tb927.3.4650	C-8 sterol isomerase, putative	Sterols	1565	1151	6278	4330	3225	8552	5778	2040	47	41	166	152	122	107	102	89
Tb927.4.4340	Domain of unknown function (DUF4498), putative	ZUnknown	1566	978	1570	1146	1107	3083	2428	1236	47	35	42	40	42	39	43	54
Tb927.10.7750	hypothetical protein, conserved	ZUnknown	1567	1123	2433	1693	1789	4822	3753	1827	47	40	64	60	67	61	66	80
Tb927.11.4240	hypothetical protein, conserved	ZUnknown	1568	1176	1607	1187	1585	5451	4827	2333	47	42	42	42	60	68	85	102
Tb927.2.2130	small GTP-binding protein RAB6, putative	Vesicular.transport	1569	1136	2957	2018	1498	3880	2804	933	47	41	78	71	56	49	49	41
Tb927.5.292b	hypothetical protein	ZUnknown	1569	1295	1102	733	2117	6319	5731	3034	47	47	29	26	80	79	101	132
Tb927.10.13190	ARP2/3 complex subunit, putative	Cytoskeleton	1571	1103	1878	1323	1548	4092	3372	886	47	40	50	47	58	51	59	39
Tb927.10.13760	hypothetical protein, conserved	ZUnknown	1571	792	1519	1070	1226	3881	2817	1061	47	29	40	38	46	49	50	46
Tb927.10.750	hypothetical protein, conserved	ZUnknown	1571	1319	3262	2456	3244	9892	5999	4471	47	48	86	86	122	124	106	195
Tb927.6.3320	ferric reductase transmembrane protein, putative	Enzyme	1571	1459	953	725	1218	4357	3834	2083	47	53	25	26	46	55	68	91
Tb927.7.1170	Y14	Nuclear.transport	1571	1160	3080	2199	2193	6012	4326	2201	47	42	81	77	83	76	76	96
Tb927.11.16940	MIZ/SP-RING zinc finger, putative	ZUnknown	1572	1232	2431	1853	1503	4158	3043	1011	47	44	64	65	57	52	54	44
Tb927.5.3520	queuine tRNA-ribosyltransferase, putative	rRNA.tRNA.process	1572	1334	2409	1735	1491	4088	3569	2065	47	48	64	61	56	51	63	90
Tb927.11.13150	UEV domain/Zinc finger, C3HC4 type (RING finger), putative	ZUnknown	1575	1245	2888	2135	1950	6377	4372	2438	47	45	76	75	73	80	77	106
Tb927.6.4540	HMG-CoA reductase	Prenylation	1575	920	3342	2505	1086	1990	1558	346	47	33	88	88	41	25	27	15
Tb927.10.12350	hypothetical protein, conserved	ZUnknown	1576	1345	2166	1560	2187	6807	5673	3475	47	48	57	55	82	86	100	151
Tb927.11.5670	MND1 homologue, putative involvement in meiosis	DNA	1576	1398	1586	1244	891	2624	2464	694	47	50	42	44	34	33	43	30
Tb927.10.6120	Peptidase M76 family, putative	ZUnknown	1577	1696	2186	1518	1589	4602	3996	2271	47	61	58	53	60	58	70	99
Tb927.11.7910	hypothetical protein	ZUnknown	1577	1335	2546	1848	1893	5308	4635	2503	47	48	67	65	71	67	82	109
Tb927.10.1120	hypothetical protein, conserved	ZUnknown	1578	1144	925	815	653	1597	1112	362	47	41	24	29	25	20	20	16
Tb927.1.2600	PUF9	RNA.binding	1579	862	553	354	343	516	426	109	47	31	15	12	13	6	8	5
Tb927.11.11110	NEK20 protein kinase	Protein.kinase	1579	1222	1679	1119	1527	4479	4336	2566	47	44	44	39	58	56	76	112
Tb927.3.2060	protein kinase, putative	Protein.kinase	1579	731	651	535	561	1292	910	234	47	26	17	19	21	16	16	10
Tb927.8.5320	hypothetical protein, conserved	ZUnknown	1579	1359	2372	1955	3031	10771	7509	5558	47	49	63	69	114	135	132	242
Tb927.1.1700	AATF protein, putative	ZUnknown	1580	756	1355	1109	576	1240	1149	173	47	27	36	39	22	16	20	8
Tb927.7.4190	zinc finger domain, LSD1 subclass, putative	Zinc.finger	1580	1602	1426	1064	1926	5772	4772	2115	47	58	38	37	73	73	84	92
Tb927.11.16450	hypothetical protein, conserved	ZUnknown	1581	1679	2454	1817	1919	5621	3858	2099	47	61	65	64	72	71	68	91
Tb927.4.3090	hypothetical protein, conserved	ZUnknown	1581	937	918	733	1138	3034	3086	1431	47	34	24	26	43	38	54	62
Tb927.1.1060	Cell cycle checkpoint protein RAD1-like, putative	Cell.cycle	1582	1046	1142	848	959	2400	1957	552	47	38	30	30	36	30	34	24
Tb927.11.15320	hypothetical protein	ZUnknown	1582	654	756	487	519	1200	952	334	47	24	20	17	20	15	17	15
Tb927.4.5060	hypothetical protein	ZUnknown	1582	868	3068	2328	1259	3014	2307	458	47	31	81	82	47	38	41	20
Tb927.11.4870	hypothetical protein, conserved, no clear yeast or human matches, domain of unknown funciton	Mito.pathway	1583	1116	5376	3951	2673	8308	6362	3756	47	40	142	139	101	104	112	164
Tb927.11.16680	tRNA pseudouridine synthase D (TruD), putative	ZUnknown	1584	756	642	600	429	1024	687	249	47	27	17	21	16	13	12	11
Tb927.6.2820	hypothetical protein, conserved	ZUnknown	1584	1440	1336	945	1203	4203	3910	2132	47	52	35	33	45	53	69	93
Tb927.9.3010	hypothetical protein, conserved	ZUnknown	1584	1197	2536	1869	2060	6227	4293	2580	47	43	67	66	78	78	76	112
Tb927.2.3400	hypothetical protein, copurified with splicing complex	ZUnknown	1585	1556	1540	1091	1419	3896	3733	1657	47	56	41	38	53	49	66	72
Tb927.11.2990	KREPB4	Mito.RNA	1586	790	1813	1316	1606	3940	2918	810	47	28	48	46	61	49	51	35
Tb927.4.1620	phosphatidylinositol 4-phosphate 5-kinase alpha (PIPKA)	Signalling	1586	640	1103	936	703	1713	1111	288	47	23	29	33	26	22	20	13
Tb927.10.10800	palmitoyl acyltransferase 2, TbPAT2	Lipids	1587	589	1658	1767	956	2470	1584	348	47	21	44	62	36	31	28	15
Tb927.9.12820	dynein light chain, putative,dynein Tctex2 family, putative	Cytoskeleton	1587	1765	3087	2368	1895	6616	4607	2708	47	64	82	83	71	83	81	118
Tb927.2.2180	RRP41B exosome protein PH subunit	RNA.degradation	1588	1802	4841	3681	2940	8469	5516	2128	47	65	128	129	111	106	97	93
Tb927.9.12670	nucleic acid binding protein,CCHC and RING	Ubiquitin.proteasome	1588	1625	2739	1894	2421	7494	6377	3587	47	59	72	67	91	94	112	156
Tb927.1.1610	hypothetical protein, conserved	Mito.pathway	1589	1105	2101	1225	1756	5345	4969	2679	47	40	56	43	66	67	88	117
Tb927.10.470	choline dehydrogenase, putative	Amino.acids	1590	698	4361	3321	2042	5379	3339	701	47	25	115	117	77	68	59	31
Tb927.10.5120	KREPA6	Mito.RNA	1590	1524	2591	2167	2200	6672	5149	3442	47	55	68	76	83	84	91	150
Tb927.5.3980	Mitchondrial LSU ribosomal protein	Mito.translation	1590	1044	3452	2552	1993	5502	3907	1144	47	38	91	90	75	69	69	50
Tb927.8.4310	hypothetical protein, conserved, no domains	ZUnknown	1590	1126	780	368	739	1413	1550	321	47	41	21	13	28	18	27	14
Tb927.11.14260	atypical dual specificity phosphatase, putative	Phosphatase	1591	1386	1872	1265	1710	4604	3832	1242	47	50	49	45	64	58	67	54
Tb927.11.8280	hypothetical protein, conserved	ZUnknown	1591	1227	2279	1595	1708	5036	4289	2299	47	44	60	56	64	63	76	100
Tb927.5.2310	Phosphorylated CTD interacting factor 1 WW domain containing protein, putative	ZUnknown	1592	1324	1329	1205	935	2045	1491	368	48	48	35	42	35	26	26	16
Tb927.8.1380	hypothetical protein, conserved	ZUnknown	1593	1430	1275	880	976	3606	2694	1013	48	52	34	31	37	45	47	44
Tb927.7.5450	lipin, phosphatidic acid phosphatase	Lipids	1594	869	499	249	477	880	868	188	48	31	13	9	18	11	15	8
Tb927.11.9200	methyltransferase domain containing protein, putative	ZUnknown	1596	774	1146	708	1106	2924	2164	474	48	28	30	25	42	37	38	21
Tb927.2.2360	Ankyrin repeats (3 copies)/Zinc finger, C3HC4 type (RING finger), putative	ZUnknown	1596	1180	1329	779	1521	3341	3036	715	48	43	35	27	57	42	53	31
Tb927.7.1380	hypothetical protein, conserved	ZUnknown	1597	1298	2610	2021	2353	7756	6753	4288	48	47	69	71	89	97	119	187
Tb927.8.5370	hypothetical protein, conserved, no yeast or human match	ZUnknown	1599	532	1757	1410	1110	2598	1923	551	48	19	46	50	42	33	34	24
Tb927.11.12340	predicted Zinc finger, C3HC4 type (RING finger) protein	Ubiquitin.proteasome	1600	943	728	593	672	1907	1684	366	48	34	19	21	25	24	30	16
Tb927.3.3920	AUK2 serine/threonine-protein kinase	Protein.kinase	1600	835	1180	970	788	1935	1209	442	48	30	31	34	30	24	21	19
Tb927.4.5130	KH domain/Domain of unknown function (DUF1771)/Smr domain containing protein, putative	ZUnknown	1600	1087	1612	1302	861	2216	1609	341	48	39	43	46	32	28	28	15
Tb927.9.2320	POMP1 (possible S-Adenosyl methionine methyl transferase (yeast Cgt1 is involved in lipid homeostasis)	Enzyme	1600	670	3607	2631	1255	2925	2450	489	48	24	95	93	47	37	43	21
Tb927.11.9370	hypothetical protein, conserved	ZUnknown	1601	1260	2613	2012	1637	4647	2463	683	48	45	69	71	62	58	43	30
Tb927.4.4100	hypothetical protein, conserved	ZUnknown	1602	553	667	534	690	1891	1451	357	48	20	18	19	26	24	26	16
Tb927.8.2420	hypothetical protein, conserved	ZUnknown	1602	703	865	793	859	2195	1564	353	48	25	23	28	32	28	28	15
Tb927.8.6900	transport protein particle (TRAPP) component, putative	ZUnknown	1602	1438	2147	1472	1836	5802	4290	2567	48	52	57	52	69	73	76	112
Tb927.11.15770	hypothetical protein, conserved	ZUnknown	1603	959	2216	1878	1332	3606	2600	898	48	35	59	66	50	45	46	39
Tb927.7.1010	hypothetical protein, conserved	ZUnknown	1603	1296	3395	2644	2865	9852	7304	5209	48	47	90	93	108	124	129	227
Tb927.8.7280	emp24/gp25L/p24 family/GOLD, putative	Vesicular.transport	1603	1039	1281	1035	1736	5305	4093	1094	48	37	34	36	65	67	72	48
Tb927.10.8790	OTU-like cysteine protease, putative	ZUnknown	1604	1195	3586	2640	1996	5068	3613	1178	48	43	95	93	75	64	64	51
Tb927.5.3290	Protein of unknown function, putative	ZUnknown	1604	737	375	231	275	466	480	105	48	27	10	8	10	6	8	5
Tb927.8.1350	hypothetical protein, conserved	ZUnknown	1604	768	971	795	655	1484	1172	295	48	28	26	28	25	19	21	13
Tb927.8.6040	Kinetoplast ribosomal PPR-repeat containing protein 11	Mito.RNA	1604	1221	2618	2013	1737	5009	3917	1945	48	44	69	71	65	63	69	85
Tb927.9.10830	HD domain containing protein, Homologue iof E. coli YfbR	Nucleotides	1604	843	2920	2225	2435	8324	6214	4029	48	30	77	78	92	105	109	176
Tb927.11.5530	Mitochondrial LSU-associated	Mito.pathway	1605	1713	2429	1846	1613	5424	4514	2596	48	62	64	65	61	68	79	113
Tb927.11.810	hypothetical protein, conserved	ZUnknown	1605	745	550	378	400	741	700	249	48	27	15	13	15	9	12	11
Tb927.7.3430	Mitchondrial LSU ribosome-associated cyclophilin type peptidyl-prolyl cis-trans isomerase, putative (PPIase)	Mito.translation	1605	1063	2330	1752	1819	5023	4239	1960	48	38	62	62	69	63	75	85
Tb927.9.9690	hypothetical protein, conserved	ZUnknown	1605	1537	2240	1696	1689	5067	4119	2156	48	55	59	60	64	64	73	94
Tb927.3.2910	hypothetical protein, conserved	ZUnknown	1606	1365	1709	1092	2428	6728	4963	2702	48	49	45	38	92	85	87	118
Tb927.8.4410	ARP2/3 complex subunit, putative	Cytoskeleton	1606	1031	960	678	930	2309	1703	276	48	37	25	24	35	29	30	12
Tb927.4.2260	Centrin1	Cell.cycle	1608	1764	2414	1664	1306	4119	3332	1357	48	64	64	59	49	52	59	59
Tb927.10.5660	heat shock protein, putative	Chaperone	1609	1582	3068	2158	2067	5891	3884	1178	48	57	81	76	78	74	68	51
Tb927.4.2550	hypothetical protein, conserved	ZUnknown	1609	923	2376	1437	1645	4797	3832	1522	48	33	63	51	62	60	67	66
Tb927.10.10740	hypothetical protein, conserved	ZUnknown	1610	471	733	638	503	1108	938	326	48	17	19	22	19	14	17	14
Tb927.3.1730	hypothetical protein, conserved	Mito.pathway	1610	1313	2883	2115	1606	4572	2971	809	48	47	76	74	61	57	52	35
Tb927.11.10570	Mitchondrial LSU ribosomal protein	Mito.translation	1611	1424	2586	1829	1670	4971	4225	1284	48	51	68	64	63	62	74	56
Tb927.6.4790	hypothetical protein, conserved	ZUnknown	1611	1295	2914	2085	2645	7665	5562	3786	48	47	77	73	100	96	98	165
Tb927.11.10780	Voltage-dependent anion channel (VDAC), putative	Transporter	1612	1386	3451	2785	1991	6197	4007	1453	48	50	91	98	75	78	71	63
Tb927.6.1610	ribosomal RNA adenine dimethylase family protein, =yeast Dim1	rRNA.tRNA.process	1612	1349	2537	1725	1584	4751	5156	2145	48	49	67	61	60	60	91	93
Tb927.3.5470	hypothetical protein, conserved	ZUnknown	1613	1438	2037	1310	1732	5096	4017	1695	48	52	54	46	65	64	71	74
Tb927.9.10430	Zinc-binding domain containing protein, putative	Zinc.finger	1613	1010	2841	2273	2640	8634	6681	4686	48	36	75	80	99	108	118	204
Tb927.10.3160	hypothetical protein, conserved	ZUnknown	1615	1608	1482	1242	1030	2523	1477	345	48	58	39	44	39	32	26	15
Tb927.10.7960	hypothetical protein, conserved	ZUnknown	1615	731	1761	1257	1638	4930	3601	1154	48	26	47	44	62	62	63	50
Tb927.6.3950	hypothetical protein, conserved	ZUnknown	1616	1386	1280	1048	1240	2921	2143	562	48	50	34	37	47	37	38	24
Tb927.4.350	hypothetical protein, conserved	ZUnknown	1618	1197	2014	1314	1947	5591	3558	1165	48	43	53	46	73	70	63	51
Tb927.9.1910	hypothetical protein, conserved	ZUnknown	1618	1329	2091	1514	1667	4628	4196	1939	48	48	55	53	63	58	74	84
Tb927.5.2990	hypothetical protein, conserved	ZUnknown	1619	1272	2727	2186	1904	5195	3107	1034	48	46	72	77	72	65	55	45
Tb927.2.5190	HOP2 putative homologue, involved in meiosis?	DNA	1620	1235	3032	2239	1312	4534	3475	1415	48	45	80	79	49	57	61	62
Tb927.8.2090	cyclophilin type peptidyl-prolyl cis-trans isomerase, copurifed with splicing complexes	RNA.processing	1620	1190	2394	1764	1733	5553	4304	2115	48	43	63	62	65	70	76	92
Tb927.9.3850	Protein of unknown function (DUF788), putative	ZUnknown	1621	618	1320	963	1015	2638	1914	823	48	22	35	34	38	33	34	36
Tb927.10.8700	selenoprotein, putative	ZUnknown	1622	1476	2760	2134	2391	6232	4252	1929	48	53	73	75	90	78	75	84
Tb927.3.3530	hypothetical protein, conserved	ZUnknown	1622	1140	1845	1315	1148	3253	2414	677	48	41	49	46	43	41	43	29
Tb927.3.3660	NADH-ubiquinone oxidoreductase complex I subunit, putative	Mito.pathway	1622	1196	4282	2917	2242	6137	4970	2038	48	43	113	103	84	77	88	89
Tb927.11.1370	glutaredoxin GRX1	Redox	1623	1626	6118	4727	3036	12444	7775	4367	48	59	162	166	114	156	137	190
Tb927.6.920	helicase, putative	DNA	1623	394	225	166	148	404	378	110	48	14	6	6	6	5	7	5
Tb927.11.10890	hypothetical protein, conserved	ZUnknown	1624	1284	1783	1457	1371	3914	2864	801	48	46	47	51	52	49	50	35
Tb927.9.9140	hypothetical protein, conserved	ZUnknown	1625	1505	1298	923	1333	3654	2995	810	48	54	34	32	50	46	53	35
Tb927.11.12670	TYW3 homologue, phe-tRNA modification, reading frame maintenance	Translation	1626	1143	1489	1168	1260	3276	2649	996	49	41	39	41	47	41	47	43
Tb927.4.330	hypothetical protein, conserved	Mito.pathway	1627	1361	3051	2256	1826	4942	4399	1765	49	49	81	79	69	62	77	77
Tb927.5.1270	hypothetical protein, conserved	ZUnknown	1627	1400	1507	986	932	3163	2915	1211	49	50	40	35	35	40	51	53
Tb927.10.10600	ARP2/3 complex 16kDa subunit, putative	Cytoskeleton	1629	1698	2626	2015	2195	6542	3716	2239	49	61	69	71	83	82	65	98
Tb927.10.11160	NFU2	Mito.pathway	1629	828	4014	2795	2624	7100	5766	2527	49	30	106	98	99	89	102	110
Tb927.8.6350	CYC11, CYC2-like cyclin	Cell.cycle	1629	947	1104	729	622	1239	1047	205	49	34	29	26	23	16	18	9
Tb927.1.1660	ESCO acetyltransferase domain-containing protein	ZUnknown	1630	1043	1465	1014	1286	3531	2934	1004	49	38	39	36	48	44	52	44
Tb927.11.12500	hypothetical protein, conserved	ZUnknown	1630	731	2054	1635	1603	4117	2054	601	49	26	54	58	60	52	36	26
Tb927.4.1240	hypothetical protein	ZUnknown	1630	971	645	602	847	2766	1979	797	49	35	17	21	32	35	35	35
Tb927.8.1970	hypothetical protein, conserved	ZUnknown	1630	1340	1632	1243	1574	5376	4467	2602	49	48	43	44	59	68	79	113
Tb927.1.2320	hypothetical protein, conserved	ZUnknown	1631	1371	2775	1970	2264	6727	5276	2497	49	49	73	69	85	84	93	109
Tb927.3.2260	Mitchondrial SSU ribosomal protein	Mito.translation	1631	1022	5346	3767	3032	9872	7347	3963	49	37	141	133	114	124	129	173
Tb927.11.11440	A/G-specific adenine glycosylase, putative	DNA	1632	671	1611	1186	1149	2877	2328	805	49	24	43	42	43	36	41	35
Tb927.8.4850	hypothetical protein, conserved	ZUnknown	1632	1042	1750	1393	1389	3536	2491	823	49	38	46	49	52	44	44	36
Tb927.9.9170	hypothetical protein, conserved, P-loop NTP hydrolase domain, no yeast or human match	ZUnknown	1632	795	1989	1317	1649	4595	3572	1202	49	29	53	46	62	58	63	52
Tb927.10.16030	MAPK2 protein kinase	Protein.kinase	1633	1120	2434	1423	2456	7481	6015	3592	49	40	64	50	93	94	106	156
Tb927.11.14810	hypothetical protein, conserved	ZUnknown	1633	1355	1648	1226	1601	4803	3607	1596	49	49	44	43	60	60	64	70
Tb927.3.790	ZC3H6	RNA.binding	1633	1111	1393	1087	913	2215	1520	416	49	40	37	38	34	28	27	18
Tb927.9.13290	HSP20 domain	Chaperone	1634	1524	2017	1481	1828	5304	3975	1511	49	55	53	52	69	67	70	66
Tb927.11.7880	hypothetical protein, conserved	ZUnknown	1635	960	2499	1711	2248	6345	4094	2158	49	35	66	60	85	80	72	94
Tb927.2.4620	Transmembrane adaptor Erv26, putative	ZUnknown	1635	1185	2561	1878	2321	7220	5905	2701	49	43	68	66	87	91	104	118
Tb927.10.15930	pdz domain containing protein, putative	ZUnknown	1636	1146	1031	821	850	2295	2202	591	49	41	27	29	32	29	39	26
Tb927.8.1880	Mitchondrial LSU ribosomal protein	Mito.translation	1636	1011	3221	2314	2183	6307	4440	2256	49	36	85	81	82	79	78	98
Tb927.10.6990	hypothetical protein, conserved	ZUnknown	1638	1473	1958	1376	2080	6034	4552	1759	49	53	52	48	78	76	80	77
Tb927.10.3740	hypothetical protein, conserved	ZUnknown	1639	772	1074	784	629	1446	1389	415	49	28	28	28	24	18	24	18
Tb927.7.4310	pyridine nucleotide-disulphide oxidoreductase, putative	ZUnknown	1641	894	2079	1576	1116	2870	2029	416	49	32	55	55	42	36	36	18
Tb927.7.5720	hypothetical protein, conserved	ZUnknown	1641	1200	1872	1624	1203	3398	2578	772	49	43	49	57	45	43	45	34
Tb927.6.2850	ESAG8-associated protein, putative (PIE8)	ESAG	1642	1300	1047	413	538	1081	802	65	49	47	28	15	20	14	14	3
Tb927.1.1270	homocysteine S-methyltransferase, putative	Amino.acids	1643	1326	2356	1258	1762	4176	4204	1866	49	48	62	44	66	52	74	81
Tb927.10.11750	hypothetical protein, conserved	ZUnknown	1643	1118	2034	1482	1437	4031	3493	1353	49	40	54	52	54	51	62	59
Tb927.11.14500	Protein kinase domain containing protein, putative	ZUnknown	1643	1172	937	577	942	2289	2046	474	49	42	25	20	36	29	36	21
Tb927.5.2270	hypothetical protein, conserved	ZUnknown	1643	2684	3297	2103	2608	8073	5784	2461	49	97	87	74	98	101	102	107
Tb927.8.580	hypothetical protein, conserved	Mito.pathway	1643	1500	3312	2816	2545	8103	6779	3968	49	54	88	99	96	102	119	173
Tb927.11.12570	kinetoplastid-specific dual specificity phosphatase, putative	Phosphatase	1644	923	1768	1169	1436	4041	3356	1273	49	33	47	41	54	51	59	55
Tb927.11.5580	hypothetical protein, conserved	ZUnknown	1644	1290	1156	837	1306	4287	4085	2220	49	47	31	29	49	54	72	97
Tb927.11.700	hypothetical protein, conserved	ZUnknown	1644	856	1195	823	1058	3090	2767	1318	49	31	32	29	40	39	49	57
Tb927.10.3330	DDRGK domain containing protein, putative	ZUnknown	1645	817	1539	1036	1253	3531	2646	560	49	29	41	36	47	44	47	24
Tb927.8.8020	monoglyceride lipase, putative	Lipids	1645	1557	2720	1677	1940	5357	4291	2126	49	56	72	59	73	67	76	93
Tb927.9.7800	hypothetical protein, conserved	ZUnknown	1646	917	4369	3108	2142	6274	4238	2160	49	33	115	109	81	79	75	94
Tb927.10.5290	NFU3	Mito.pathway	1647	1407	3588	2673	2565	7890	6313	3709	49	51	95	94	97	99	111	162
Tb927.11.9160	ATPase-like protein, putative	Enzyme	1647	1370	885	598	778	1881	1555	402	49	49	23	21	29	24	27	18
Tb927.7.1500	CFD1 Cytosolic iron-sulphur cluster biogenesis, Thiomodification of cytiosolic tRNAs (NBP 2)	rRNA.tRNA.process	1648	809	3377	2574	2115	5219	3405	1113	49	29	89	91	80	66	60	48
Tb927.9.12170	leucine-rich repeat protein (LRRP)	LRRP	1649	1496	1583	778	1838	4670	4066	1597	49	54	42	27	69	59	72	70
Tb927.11.13790	hypothetical protein, conserved	ZUnknown	1651	1357	5530	4052	2929	9049	6279	2839	49	49	146	143	110	114	111	124
Tb927.7.870	hypothetical protein, conserved	ZUnknown	1651	1242	1833	1310	1573	4613	3783	1573	49	45	48	46	59	58	67	69
Tb927.4.2810	hypothetical protein	ZUnknown	1652	830	875	540	869	1999	1540	196	49	30	23	19	33	25	27	9
Tb927.10.1810	RING-H2 zinc finger, putative	ZUnknown	1654	1596	3845	3033	2709	9071	6499	4487	49	58	102	107	102	114	114	195
Tb927.11.4630	hypothetical protein, conserved	ZUnknown	1654	1260	3242	2440	1950	5032	3773	1749	49	45	86	86	73	63	66	76
Tb927.11.6100	hypothetical protein, conserved	ZUnknown	1654	1112	1804	1178	1537	4999	4767	2674	49	40	48	41	58	63	84	116
Tb927.9.10970	Bem46-like serine peptidase,Serine peptidase, Clan SC, Family S09X	Protease	1654	1172	1964	1217	1575	3898	3473	1364	49	42	52	43	59	49	61	59
Tb927.4.2110	protein phosphatase 2C, putative	Protein.phosphatase	1655	582	444	414	292	655	456	93	49	21	12	15	11	8	8	4
Tb927.10.10690	CEP19	Cytoskeleton	1656	642	1231	825	663	1583	1401	272	49	23	33	29	25	20	25	12
Tb927.10.5020	eIF4E5	Translation	1657	1929	3101	2399	1734	5637	3920	1607	49	70	82	84	65	71	69	70
Tb927.9.15240	ATP11 protein, putative	ZUnknown	1657	1316	3754	2720	2034	6257	4164	1296	49	47	99	96	77	79	73	56
Tb927.10.4930	protein phosphatase 2C, putative	Protein.phosphatase	1658	1540	2001	1484	1655	5388	4329	2170	49	56	53	52	62	68	76	95
Tb927.3.5390	Ring finger domain containing protein, putative	ZUnknown	1658	1530	1054	559	1009	2664	2401	783	49	55	28	20	38	33	42	34
Tb927.9.7810	hypothetical protein, conserved	ZUnknown	1658	1211	2241	1733	2282	6928	5329	2778	49	44	59	61	86	87	94	121
Tb927.11.16550	ZC3H46	RNA.binding	1659	1084	507	265	544	812	1132	195	50	39	13	9	21	10	20	8
Tb927.11.6380	hypothetical protein, conserved	ZUnknown	1660	1588	2002	1535	1823	5121	4565	2057	50	57	53	54	69	64	80	90
Tb927.11.8080	btb/poz domain containing protein, putative	ZUnknown	1660	1260	2927	2137	2193	6573	4192	1521	50	45	77	75	83	83	74	66
Tb927.11.14160	Alpha/beta hydrolase family, putative	ZUnknown	1661	1207	3137	2320	1855	4631	3249	641	50	44	83	82	70	58	57	28
Tb927.11.2580	POMP11	Mito.membrane	1662	1312	4083	3077	1597	4099	2959	696	50	47	108	108	60	51	52	30
Tb927.11.9290	FAZ20 protein tyrosine kinase, putative	Cytoskeleton	1662	628	413	331	347	784	628	141	50	23	11	12	13	10	11	6
Tb927.8.7070	FAZ15 flagellar attachment zone protein	Cytoskeleton	1662	1061	644	489	455	1397	1124	281	50	38	17	17	17	18	20	12
Tb927.11.12070	hypothetical protein, conserved	ZUnknown	1663	1232	2190	1658	1283	4014	2818	1014	50	44	58	58	48	50	50	44
Tb927.9.15020	hypothetical protein, conserved	ZUnknown	1664	922	2137	1308	1662	4997	4167	2488	50	33	56	46	63	63	73	108
Tb927.11.5660	hypothetical protein, conserved	ZUnknown	1665	1470	780	526	854	2718	2321	806	50	53	21	19	32	34	41	35
Tb927.4.690	geranylgeranyl transferase type II beta subunit, putative	Prenylation	1665	1577	1868	1211	1480	3887	3358	1530	50	57	49	43	56	49	59	67
Tb927.2.3910	beta-ketoacyl synthase family protein, putative	Lipids	1666	820	1460	1072	894	1990	1831	340	50	30	39	38	34	25	32	15
Tb927.7.4440	NAD dependent epimerase/dehydratase family, putative	Mito.pathway	1667	1597	2186	1574	1831	4678	3277	1302	50	58	58	55	69	59	58	57
Tb927.8.2760	mtYsxC	Mito.translation	1667	731	3023	2138	2242	5879	4694	2195	50	26	80	75	84	74	83	96
Tb927.11.4270	hypothetical protein, conserved	ZUnknown	1668	1291	2764	1997	2158	5873	4347	1987	50	47	73	70	81	74	77	87
Tb927.3.3880	hypothetical protein, conserved	ZUnknown	1669	1994	3720	2876	2641	7758	5592	2704	50	72	98	101	100	97	98	118
Tb927.10.15710	mitochondrial carrier protein, MCP7	Mito.transport	1670	951	1368	1065	822	1942	1453	373	50	34	36	37	31	24	26	16
Tb927.11.14830	hypothetical protein, conserved	ZUnknown	1670	2048	1710	1247	1438	4168	3507	2089	50	74	45	44	54	52	62	91
Tb927.11.13070	O-phosphoseryl-tRNA(Sec) selenium transferase, putative	ZUnknown	1671	678	1590	1250	991	2240	1496	393	50	24	42	44	37	28	26	17
Tb927.11.7216	origin recognition complex subunit 1 (ORC1), (CDC6)	Cell.cycle	1671	1301	1721	1163	1148	3725	3169	1367	50	47	45	41	43	47	56	60
Tb927.11.7700	hypothetical protein	ZUnknown	1671	1152	18835	13571	6650	20765	11304	2540	50	42	498	477	251	261	199	111
Tb927.3.2460	hypothetical protein, conserved	ZUnknown	1672	1395	2058	1288	2909	9677	7910	4176	50	50	54	45	110	122	139	182
Tb927.11.9940	hypothetical protein, conserved	ZUnknown	1675	1213	2811	2029	2126	5866	4604	2236	50	44	74	71	80	74	81	97
Tb927.4.2570	hypothetical protein, conserved	ZUnknown	1675	1619	1862	1270	1393	3946	3120	709	50	58	49	45	52	50	55	31
Tb927.7.6930	ATPase, putative	Mito.pathway	1675	987	1458	1280	1001	2732	1772	337	50	36	39	45	38	34	31	15
Tb927.8.2700	hypothetical protein, conserved	ZUnknown	1675	563	2313	1805	2417	7570	4943	921	50	20	61	63	91	95	87	40
Tb927.9.5390	hypothetical protein, conserved	ZUnknown	1675	1667	2244	1494	2785	8533	6429	3263	50	60	59	53	105	107	113	142
Tb927.11.1190	Ring finger domain/PHD-finger, putative	ZUnknown	1676	1436	1258	964	1171	3421	2058	460	50	52	33	34	44	43	36	20
Tb927.5.2110	G-patch domain containing protein, putative	ZUnknown	1676	1636	3394	2738	2547	7422	5854	3579	50	59	90	96	96	93	103	156
Tb927.6.2780	U3 small nuclear ribonucleoprotein (snRNP), putative	rRNA.tRNA.process	1676	1784	2821	2023	1838	5275	4171	1473	50	64	75	71	69	66	73	64
Tb927.9.3620	hypothetical protein, conserved	ZUnknown	1676	950	2341	1671	1983	6145	4652	2790	50	34	62	59	75	77	82	122
Tb927.10.11030	ATOM11 - POMP21	Mito.biogenesis	1677	1447	5129	3688	2592	8781	5343	2611	50	52	136	130	98	110	94	114
Tb927.10.3040	SDH9 succinate dehydrogenase (complex II) subunit	Mito.e.transport	1677	1343	8747	6657	4829	17369	10129	5056	50	48	231	234	182	218	178	220
Tb927.10.6300	Mitchondrial SSU ribosomal protein S5	Mito.translation	1677	837	2698	1735	1403	3636	2750	715	50	30	71	61	53	46	48	31
Tb927.10.8890	kinetoplast DNA-associated protein, putative	Mito.DNA	1677	1287	1734	1116	1148	2575	1812	556	50	46	46	39	43	32	32	24
Tb927.11.10130	hypothetical protein, conserved	ZUnknown	1677	1181	1480	1102	1147	3248	2373	1035	50	43	39	39	43	41	42	45
Tb927.6.2190	hypothetical protein, conserved	ZUnknown	1677	1348	1595	1026	1158	3174	2812	1107	50	49	42	36	44	40	50	48
Tb927.9.1570	protein kinase, putative	Protein.kinase	1677	1473	2888	1632	2230	6173	5268	3215	50	53	76	57	84	78	93	140
Tb927.3.5430	hypothetical protein, conserved	ZUnknown	1678	1854	5771	3920	3103	8518	5818	3027	50	67	153	138	117	107	102	132
Tb927.10.6820	hypothetical protein, conserved	ZUnknown	1679	1860	2724	1784	2025	6525	5064	3038	50	67	72	63	76	82	89	132
Tb927.4.2930	OsmC-like protein, putative	ZUnknown	1679	981	1746	1312	915	2163	1941	511	50	35	46	46	34	27	34	22
Tb927.6.4340	U2 SSm2-1/Sm15K, EmD3 paralogue in U2 Sm core (not Lsm5)	RNA.processing	1679	1388	1755	1323	1525	4871	4654	2886	50	50	46	47	57	61	82	126
Tb927.8.5900	Sedlin, N-terminal conserved region, putative	ZUnknown	1679	1423	1524	1175	1380	5506	4699	2238	50	51	40	41	52	69	83	97
Tb927.11.12120	RBP9	RNA.binding	1680	1607	432	235	717	1805	2006	426	50	58	11	8	27	23	35	19
Tb927.7.6800	Mitchondrial LSU ribosomal protein	Mito.translation	1680	1019	5310	4188	2456	6052	3949	975	50	37	140	147	93	76	70	42
Tb927.9.13020	Microtubule-associated protein Bicaudal-D, putative	ZUnknown	1680	1522	1481	1152	1182	3909	3493	1317	50	55	39	41	45	49	62	57
Tb927.10.3180	zinc-finger of acetyl-transferase ESCO, putative	Zinc.finger	1681	923	1335	923	874	2191	1829	506	50	33	35	32	33	28	32	22
Tb927.4.3430	hypothetical protein, conserved	ZUnknown	1681	1055	2281	1862	1823	5761	3815	1725	50	38	60	66	69	72	67	75
Tb927.8.7340	trans-sialidase, putative,neuraminidase, putative	Membrane.protein	1681	1419	9447	6543	1691	3496	3689	610	50	51	250	230	64	44	65	27
Tb927.10.4860	hypothetical protein, conserved	ZUnknown	1683	995	1295	999	1060	2997	2225	721	50	36	34	35	40	38	39	31
Tb927.8.4480	Copurifies with PTP-CPSF160, may repress polyadenylation	RNA.processing	1683	1507	1604	1186	1501	4209	3625	1792	50	54	42	42	57	53	64	78
Tb927.9.11840	Pre-rRNA-processing protein PNO1	rRNA.tRNA.process	1683	1879	3104	2325	1798	5770	4545	1941	50	68	82	82	68	72	80	85
Tb927.10.680	Protein of unknown function (DUF971), putative	ZUnknown	1684	1518	2232	1522	2745	8412	7422	4159	50	55	59	54	103	106	131	181
Tb927.6.4960	ZC3H47	RNA.binding	1684	1575	2837	2165	1968	6048	3832	950	50	57	75	76	74	76	67	41
Tb927.7.4710	Mitchondrial LSU ribosomal protein	Mito.translation	1684	1149	3577	2501	2208	6253	4268	1179	50	41	95	88	83	79	75	51
Tb927.7.5670	hypothetical protein, conserved	ZUnknown	1684	1291	2385	1635	1831	5286	4051	1612	50	47	63	58	69	66	71	70
Tb927.11.460	predicted WD40 repeat protein	ZUnknown	1686	1103	1225	891	637	1349	1055	188	50	40	32	31	24	17	19	8
Tb927.3.4990	oxidoreductase, putative	Enzyme	1687	1318	3829	2839	1691	4126	3180	979	50	48	101	100	64	52	56	43
Tb927.4.2350	G-actin binding protein, putative, twinfilin, putative	Cytoskeleton	1687	1526	1940	1337	1680	4903	3228	974	50	55	51	47	63	62	57	42
Tb927.11.13110	hypothetical protein, conserved	ZUnknown	1688	607	382	251	280	572	472	185	50	22	10	9	11	7	8	8
Tb927.5.4450	hypothetical protein, conserved	ZUnknown	1688	1411	3121	2310	2127	5946	4892	2769	50	51	83	81	80	75	86	121
Tb927.6.1210	KKT6 kinetochore protein	Cell.cycle	1689	1233	3507	2524	2324	7484	5701	3043	50	44	93	89	88	94	100	133
Tb927.10.2660	hypothetical protein, conserved	ZUnknown	1690	1524	2559	1976	1639	4703	3659	937	50	55	68	70	62	59	64	41
Tb927.10.7070	small nuclear RNA-activating protein (SNAP3)	RNA.processing	1690	1189	3824	2966	2921	9432	6796	4626	50	43	101	104	110	118	120	202
Tb927.7.620	hypothetical protein, conserved	ZUnknown	1690	1573	2483	1660	1767	4998	4295	1912	50	57	66	58	67	63	76	83
Tb927.9.7090	hypothetical protein, conserved	ZUnknown	1690	1328	961	654	643	1670	1690	400	50	48	25	23	24	21	30	17
Tb927.11.6780	regulator of chromatin condensation, putative (RCC1)	Chromatin	1691	774	4463	3223	2184	6043	4152	1577	50	28	118	113	82	76	73	69
Tb927.11.7310	RNA binding protein, putative, RBD	RNA.binding	1691	1672	3149	2372	2166	6689	5484	3097	50	60	83	83	82	84	97	135
Tb927.9.9080	POMP5	Mito.membrane	1694	1712	2865	2118	1692	4866	4094	2187	51	62	76	75	64	61	72	95
Tb927.7.1650	hypothetical protein, conserved	ZUnknown	1695	843	715	538	580	1487	989	384	51	30	19	19	22	19	17	17
Tb927.4.910	hypothetical protein, conserved	ZUnknown	1696	1319	1737	1278	1395	3816	3486	1160	51	48	46	45	53	48	61	51
Tb927.7.7090	hypothetical protein, conserved, no clear yeast or human matches	ZUnknown	1696	1094	13590	9536	6075	17998	12441	4571	51	39	359	335	229	226	219	199
Tb927.10.920	Ribosomal protein L1p/L10e family, putative	ZUnknown	1697	1834	3044	2218	2076	5998	4734	2825	51	66	80	78	78	75	83	123
Tb927.3.2980	mitochondrial carrier protein, MCP17	Mito.transport	1697	1278	2030	1568	1145	2819	2192	558	51	46	54	55	43	35	39	24
Tb927.3.910	gamma-tubulin	Cytoskeleton	1697	700	1485	1193	826	2117	1425	365	51	25	39	42	31	27	25	16
Tb927.10.14480	hypothetical protein, conserved	ZUnknown	1698	672	444	379	371	807	669	182	51	24	12	13	14	10	12	8
Tb927.10.760	hypothetical protein, conserved	Mito.pathway	1698	1806	3682	2527	1974	5756	4635	2197	51	65	97	89	74	72	82	96
Tb927.3.2340	PEX2 peroxin-2,glycosome import protein (gim1)	Glycosome	1698	770	2183	1661	2127	6549	4322	1671	51	28	58	58	80	82	76	73
Tb927.9.7080	hypothetical protein, conserved	ZUnknown	1698	1684	3225	2344	2459	7491	5050	2705	51	61	85	82	93	94	89	118
Tb927.11.5810	Surfeit locus protein 6, putative	ZUnknown	1699	1104	728	651	502	1285	989	217	51	40	19	23	19	16	17	9
Tb927.3.770	Mitchondrial SSU ribosomal protein	Mito.translation	1699	1242	4329	3236	2505	7825	5895	3222	51	45	114	114	94	98	104	140
Tb927.9.9230	hypothetical protein, conserved	ZUnknown	1699	1389	1798	1294	1959	6277	4583	3380	51	50	48	46	74	79	81	147
Tb927.11.10270	golgi SNARE protein-like,GOLGI SNAP receptor complex member, putative	Vesicular.transport	1700	1408	2488	1740	2380	7400	6230	3855	51	51	66	61	90	93	110	168
Tb927.8.2560	spliceosomal U5 snRNP-specific U5-15K protein, putative	RNA.processing	1701	1457	3072	2179	2555	8535	6426	4135	51	53	81	77	96	107	113	180
Tb927.3.3070	3', 5'-cyclic nucleotide phosphodiesterase, putative (PDEC)	Signalling	1703	826	515	350	435	912	764	151	51	30	14	12	16	11	13	7
Tb927.3.4850	enoyl-CoA hydratase, mitochondrial precursor, putative	Lipids	1704	903	4208	2884	2291	6928	5205	2912	51	33	111	101	86	87	92	127
Tb927.4.710	hypothetical protein, conserved	ZUnknown	1704	1306	312	159	485	1026	1141	211	51	47	8	6	18	13	20	9
Tb927.4.940	hypothetical protein, conserved	ZUnknown	1704	1043	3470	2511	2520	7290	5768	2931	51	38	92	88	95	92	102	128
Tb927.9.3590	monothiol glutaredoxin, putative	Redox	1704	1095	3196	2340	2225	6727	4640	2187	51	39	84	82	84	84	82	95
Tb927.5.4290	hypothetical protein, conserved	ZUnknown	1705	1294	2214	1511	1949	5291	4805	2033	51	47	59	53	73	66	85	89
Tb927.6.2970	pseudouridine synthase A-like protein, putative	rRNA.tRNA.process	1705	1499	1581	1267	1133	3724	3462	1432	51	54	42	45	43	47	61	62
Tb927.11.9690	MORN repeats, phosphatidylinositol- 4-phosphate-5-kinase-like but also histon H3 K4 methylase-like	ZUnknown	1706	908	1656	1193	1255	3181	2766	1119	51	33	44	42	47	40	49	49
Tb927.10.15150	RNA polymerase III C11 subunit, putative,(RPC11)	RNA.synthesis	1707	1516	3316	2469	2384	7131	5751	3193	51	55	88	87	90	90	101	139
Tb927.11.3550	NPA3/XAB1 homologue, interacts with XPA and with RNA pol II, required for pol II import into the nucleus.	Nuclear.transport	1707	1383	3142	2169	2494	7826	5951	3281	51	50	83	76	94	98	105	143
Tb927.11.5010	TFIIF-stimulated CTD phosphatase, putative	Protein.phosphatase	1707	1315	846	503	483	1041	1096	241	51	47	22	18	18	13	19	10
Tb927.6.3260	hypothetical protein, conserved	ZUnknown	1707	1294	955	717	1101	3448	3308	937	51	47	25	25	41	43	58	41
Tb927.7.4660	hypothetical protein, conserved	ZUnknown	1707	1407	4069	2789	2910	9097	5639	2986	51	51	108	98	110	114	99	130
Tb927.7.840	Mitochondrial ATP synthase subunit, putative	Mito.pathway	1707	1497	8503	6134	3694	11464	7141	3237	51	54	225	216	139	144	126	141
Tb927.8.4280	nuclear transport factor 2, putative	Nuclear.transport	1707	1729	4442	3341	2127	6905	4538	1662	51	62	117	118	80	87	80	72
Tb927.11.13880	kinetoplastid-specific protein tyrosine phosphatase, putative	Protein.phosphatase	1708	1042	2877	2082	1808	4472	4187	1290	51	38	76	73	68	56	74	56
Tb927.11.7100	MCT1/TMA20 homologue, similar to N-terminus of eIF2D	Translation	1709	1613	3438	2665	2183	6868	5075	3077	51	58	91	94	82	86	89	134
Tb927.11.3200	Histone methylation protein DOT1, putative	ZUnknown	1710	1279	3548	2219	2800	8494	6903	3730	51	46	94	78	106	107	122	162
Tb927.8.6910	cyclophilin-type peptidyl-prolyl cis-trans isomerase, putative (PPIase)	Chaperone	1710	1602	1867	1452	1395	4688	3177	1432	51	58	49	51	53	59	56	62
Tb927.10.13980	btb/poz domain containing protein, putative	ZUnknown	1711	1555	3094	2260	1968	6466	4823	2677	51	56	82	80	74	81	85	117
Tb927.10.9960	hypothetical protein, conserved	ZUnknown	1711	795	2393	1752	2182	6516	4249	963	51	29	63	62	82	82	75	42
Tb927.8.7730	Sphingosine N-acyltransferase, putative	Lipids	1711	1449	7769	5387	2630	7126	5891	2207	51	52	205	190	99	90	104	96
Tb927.1.4280	hypothetical protein, conserved, African tryp specific, PTZ (tail-specific protease) domain	ZUnknown	1712	1124	985	644	750	1445	1116	287	51	41	26	23	28	18	20	13
Tb927.10.10010	60S acidic ribosomal subunit	Ribosome	1713	1696	3078	2393	1597	4167	3665	1229	51	61	81	84	60	52	65	54
Tb927.9.5960	SDH2C succinate dehydrogenase (complex II) subunit	Mito.e.transport	1713	1241	9795	5942	5719	16306	11200	5684	51	45	259	209	216	205	197	248
Tb927.10.13310	DNA-directed RNA polymerase II, putative,(RPB5z)	RNA.synthesis	1714	1739	3039	2181	1680	4372	3196	1147	51	63	80	77	63	55	56	50
Tb927.6.2140	hypothetical protein, conserved	Mito.RNA	1714	1139	2780	1778	2051	5241	4259	1842	51	41	73	63	77	66	75	80
Tb927.10.3690	rRNA dimethyltransferase, putative	rRNA.tRNA.process	1716	1234	1571	1104	1913	5212	4866	2326	51	44	42	39	72	65	86	101
Tb927.11.16500	hypothetical protein, conserved	ZUnknown	1716	1270	1283	913	961	2635	2161	479	51	46	34	32	36	33	38	21
Tb927.11.290	phosphatase and tensin homologue, putative	Phosphatase	1716	1572	1057	671	1633	5418	5046	2965	51	57	28	24	62	68	89	129
Tb927.11.9450	Mitchondrial LSU ribosome-associated cyclophilin type peptidyl-prolyl cis-trans isomerase, putative (PPIase)	Mito.translation	1716	1385	3657	2713	2611	7275	6002	2956	51	50	97	95	98	91	106	129
Tb927.11.13600	DnaJ domain containing protein, putative	ZUnknown	1717	1421	2545	2108	1738	4563	3519	1011	51	51	67	74	66	57	62	44
Tb927.7.890	FDXA Ferredoxin	Mito.pathway	1717	1111	2792	2030	3134	10724	10077	6759	51	40	74	71	118	135	177	294
Tb927.10.11710	hypothetical protein	ZUnknown	1718	1916	1949	1344	1334	3256	2370	958	51	69	52	47	50	41	42	42
Tb927.4.3150	hypothetical protein, conserved, ATPase domain of HSP90, DNA TopoII	ZUnknown	1719	1229	1943	1435	1440	3722	3143	786	51	44	51	50	54	47	55	34
Tb927.2.4870	kinetoplastid-specific dual specificity phosphatase, putative	Phosphatase	1722	1449	2343	1552	1843	5499	4007	2237	51	52	62	55	69	69	71	97
Tb927.5.2710	hypothetical protein, conserved	ZUnknown	1722	2272	1208	798	1061	3272	2811	491	51	82	32	28	40	41	50	21
Tb927.8.1470	POMP38	Mito.membrane	1722	833	1610	1378	958	2544	1707	678	51	30	43	48	36	32	30	30
Tb927.9.9430	hypothetical protein, conserved	ZUnknown	1722	1477	2661	1944	1922	5483	4815	2186	51	53	70	68	72	69	85	95
Tb927.6.4820	CPC1, chromosomal passenger complex	Chromatin	1723	1707	2230	1555	1848	5930	4337	2556	51	62	59	55	70	74	76	111
Tb927.3.1830	TbRMI1, DNA recombination and antigenic switching	DNA	1724	991	765	629	564	1670	1036	334	51	36	20	22	21	21	18	15
Tb927.5.990	hypothetical protein, conserved	ZUnknown	1724	1335	2445	1832	1822	4364	3037	799	51	48	65	64	69	55	53	35
Tb927.3.3020	actin-like protein, putative	Cytoskeleton	1725	1273	2325	1650	1684	4937	3736	1292	51	46	61	58	63	62	66	56
Tb927.11.7130	hypothetical protein, conserved	ZUnknown	1726	611	903	740	572	1556	1015	266	52	22	24	26	22	20	18	12
Tb927.11.8900	DPCD protein family, putative	ZUnknown	1726	1193	2125	1485	2196	7491	5765	3086	52	43	56	52	83	94	102	134
Tb927.9.1670	AUK3 protein kinase	Protein.kinase	1726	1609	1629	958	1236	3508	2969	855	52	58	43	34	47	44	52	37
Tb927.8.3780	MORN repeat, putative	ZUnknown	1727	1621	2630	1954	2355	7450	5124	3105	52	58	70	69	89	94	90	135
Tb927.3.4520	hypothetical protein, conserved	ZUnknown	1728	921	5678	4285	3340	9397	6161	2856	52	33	150	151	126	118	109	124
Tb927.10.13430	citrate synthase, putative	Citric.acid.cycle	1730	620	2247	1885	801	2568	1842	311	52	22	59	66	30	32	32	14
Tb927.10.3120	cytochrome c oxidase assembly protein, putative	Mito.e.transport	1730	879	3884	2493	2345	6847	4130	1500	52	32	103	88	88	86	73	65
Tb927.10.15500	SNARE protein, putative	Vesicular.transport	1731	1223	1433	1031	1766	5454	4707	2068	52	44	38	36	67	69	83	90
Tb927.10.11410	hypothetical protein, conserved	ZUnknown	1732	816	3068	2249	2615	7372	5518	1896	52	29	81	79	99	93	97	83
Tb927.9.6720	Putative methyltransferase, putative	ZUnknown	1732	880	1666	1181	1118	2787	2087	500	52	32	44	42	42	35	37	22
Tb927.10.14130	SRP19 protein, putative	ZUnknown	1733	974	2166	1577	1586	4946	3398	858	52	35	57	55	60	62	60	37
Tb927.11.6150	60Kd inner membrane protein, putative	ZUnknown	1733	1437	4895	3534	2298	6363	4261	1376	52	52	129	124	87	80	75	60
Tb927.4.370	hypothetical protein, conserved	ZUnknown	1733	1535	1936	1427	1495	4995	3805	1488	52	55	51	50	56	63	67	65
Tb927.10.7940	MTr1 cap methyltransferase	RNA.processing	1734	677	3128	2502	1929	4587	3117	1024	52	24	83	88	73	58	55	45
Tb927.4.900	hypothetical protein, conserved	ZUnknown	1734	1293	1360	825	1071	2775	2348	546	52	47	36	29	40	35	41	24
Tb927.8.6890	hypothetical protein, conserved	ZUnknown	1734	1367	10875	8427	8604	28594	21304	15143	52	49	287	296	324	359	375	660
Tb927.7.4930	ribonuclease H1	DNA	1735	1030	2302	1714	1711	4709	3670	1601	52	37	61	60	64	59	65	70
Tb927.9.14230	hypothetical protein, conserved	ZUnknown	1735	1149	2769	2229	1718	4429	2590	598	52	41	73	78	65	56	46	26
Tb927.11.11410	trans-sialidase, putative	Membrane.protein	1736	243	748	632	869	2108	1532	398	52	9	20	22	33	26	27	17
Tb927.11.4960	transcription elongation factor s-II, putative (TFIIS1)	RNA.synthesis	1736	1459	1677	1139	1435	4112	3452	1349	52	53	44	40	54	52	61	59
Tb927.2.2020	ESAG3, putative	ESAG	1736	1070	1275	979	1152	2863	2115	660	52	39	34	34	43	36	37	29
Tb927.9.12530	DnaJ domain containing protein, putative	ZUnknown	1736	1206	1664	1059	1768	5600	4672	1157	52	43	44	37	67	70	82	50
Tb927.4.2120	hypothetical protein, conserved	ZUnknown	1737	1001	1540	1168	956	2637	1862	667	52	36	41	41	36	33	33	29
Tb927.4.4360	monoglyceride lipase, putative	Lipids	1737	1088	1742	1326	1310	3616	2334	704	52	39	46	47	49	45	41	31
Tb927.11.4930	Phosducin, putative	ZUnknown	1738	1419	1741	1205	1800	5232	4057	2349	52	51	46	42	68	66	71	102
Tb927.5.1380	hypothetical protein	ZUnknown	1738	1237	579	433	1147	3075	3145	1007	52	45	15	15	43	39	55	44
Tb927.8.2230	Checkpoint protein HUS1, putative (hus1)	ZUnknown	1738	1380	1995	1505	1882	5385	3824	1234	52	50	53	53	71	68	67	54
Tb927.9.3170	cytochrome oxidase subunit V (COXV)	Mito.e.transport	1738	1818	32254	23539	12705	42256	23542	11486	52	66	853	828	479	531	415	500
Tb927.11.2840	magnesium-dependent phosphatase-1/HAD phosphatase, family IIIC, putative	ZUnknown	1739	1917	4221	2905	2482	7665	4075	1815	52	69	112	102	94	96	72	79
Tb927.7.880	RBP25	RNA.binding	1739	1410	2913	2399	1850	5456	4350	1633	52	51	77	84	70	69	77	71
Tb927.11.15650	TUT4 cytosolic (?) TUTase	Mito.RNA	1740	1611	1578	1126	1384	3765	3281	1582	52	58	42	40	52	47	58	69
Tb927.11.9280	hypothetical protein, conserved	ZUnknown	1740	720	562	501	396	1167	723	220	52	26	15	18	15	15	13	10
Tb927.9.7070	RRP40 exosome complex PH subunit	RNA.degradation	1740	1550	3211	2263	2614	7472	5732	3286	52	56	85	80	99	94	101	143
Tb927.3.5150	exonuclease, putative	RNA.degradation	1741	1426	2448	1665	1497	3866	2775	784	52	51	65	59	56	49	49	34
Tb927.10.670	hypothetical protein, conserved	ZUnknown	1742	1509	3279	2191	2453	7730	6105	3452	52	54	87	77	92	97	108	150
Tb927.7.4110	Kinesin-like but poor match	Cytoskeleton	1742	851	343	195	358	650	627	146	52	31	9	7	13	8	11	6
Tb927.9.3560	hypothetical protein, conserved	ZUnknown	1743	1293	1602	1138	1390	4015	3424	732	52	47	42	40	52	50	60	32
Tb927.9.12030	hypothetical protein, conserved	ZUnknown	1744	1316	4279	3206	2936	9117	6727	4002	52	47	113	113	111	115	118	174
Tb927.10.7320	hypothetical protein, conserved	ZUnknown	1746	1381	2742	1938	1673	4363	3522	1671	52	50	72	68	63	55	62	73
Tb927.11.10500	hypothetical protein, conserved	ZUnknown	1747	1608	1163	762	1080	2977	2498	608	52	58	31	27	41	37	44	26
Tb927.11.15000	survival of motor neuron (SMN)-like protein (TbSMN)	RNA.processing	1747	1598	2233	1812	1790	5194	4415	2072	52	58	59	64	67	65	78	90
Tb927.11.7330	hypothetical protein, conserved	ZUnknown	1747	1351	4096	2859	2865	8500	5979	3279	52	49	108	101	108	107	105	143
Tb927.8.5380	ubiquitin fold modifier protein UFM1	Ubiquitin.proteasome	1747	1227	2923	2263	2330	7125	4795	2648	52	44	77	80	88	89	84	115
Tb927.10.5550	hypothetical protein, conserved	ZUnknown	1750	1606	3100	2530	2138	7911	6503	3371	52	58	82	89	81	99	115	147
Tb927.5.2920	Ring finger domain containing protein, putative	ZUnknown	1751	1715	1607	1062	1645	5332	4767	2519	52	62	42	37	62	67	84	110
Tb927.1.690	hypothetical protein, conserved	ZUnknown	1752	1389	2853	2122	2027	6050	4208	2037	52	50	75	75	76	76	74	89
Tb927.10.7510	chromatin binding protein, putative	Chromatin	1752	1410	2027	1490	1424	3726	2124	623	52	51	54	52	54	47	37	27
Tb927.10.8760	hypothetical protein, conserved	ZUnknown	1752	1257	2362	1757	1914	5129	4360	1726	52	45	62	62	72	64	77	75
Tb927.11.2440	TBCCD1, bilobe, centrioles, cell body anterior	Cytoskeleton	1752	1240	1011	700	762	1848	1458	398	52	45	27	25	29	23	26	17
Tb927.11.13860	Copurifies with PTP-CPSF160, may activate polyadenylation	RNA.processing	1753	1219	1400	1132	1443	4551	3776	1223	52	44	37	40	54	57	67	53
Tb927.6.3350	hypothetical protein, conserved (YCF45-like)	Mito.pathway	1753	1281	1619	1194	1348	3671	2556	824	52	46	43	42	51	46	45	36
Tb927.7.3600	emp24/gp25L/p24 family/GOLD, putative	Vesicular.transport	1753	1523	2482	1604	1331	3986	3890	1963	52	55	66	56	50	50	69	86
Tb927.8.660	Sel1 repeat, putative	ZUnknown	1754	1646	1500	1172	1352	4306	3715	1474	52	59	40	41	51	54	65	64
Tb927.8.2360	hypothetical protein, conserved	ZUnknown	1755	1361	2355	1829	2465	7574	5596	3282	52	49	62	64	93	95	99	143
Tb927.7.790	hypothetical protein, conserved	ZUnknown	1756	837	1742	1165	1909	5372	4343	1144	52	30	46	41	72	67	76	50
Tb927.1.4800	hypothetical protein, conserved	ZUnknown	1758	1169	1479	1169	1025	2693	1922	588	52	42	39	41	39	34	34	26
Tb927.10.6690	protein tyrosine phosphatase, putative (TbPTP1)	Protein.phosphatase	1759	1244	1773	1236	1476	3564	2941	1175	52	45	47	43	56	45	52	51
Tb927.10.7760	hypothetical protein, conserved	ZUnknown	1759	997	1621	1221	1471	3870	3477	1653	52	36	43	43	55	49	61	72
Tb927.8.630	lipoate-protein ligase, lipoyltransferase, lipoate biosynthesis protein, putative	Mito.pathway	1762	1385	2138	1430	1361	3795	3134	995	53	50	57	50	51	48	55	43
Tb927.6.3700	peptidyl-tRNA hydrolase PTH2, putative	ZUnknown	1763	1470	1034	808	974	2863	2878	1574	53	53	27	28	37	36	51	69
Tb927.10.8310	Histone acetyltransferase HAT3	Chromatin	1764	2100	2423	1789	2488	7761	5713	3616	53	76	64	63	94	97	101	158
Tb927.10.13140	hypothetical protein, conserved	ZUnknown	1765	1214	2618	2136	2232	6657	4550	2364	53	44	69	75	84	84	80	103
Tb927.10.8710	Centrin3	Cell.cycle	1765	1750	2245	1537	1740	4992	3715	1875	53	63	59	54	66	63	65	82
Tb927.11.2920	glycerolphosphate mutase, putative	Glucose.glycerol	1765	1566	2598	1751	1974	5468	4119	1780	53	56	69	62	74	69	73	78
Tb927.4.460	Alkylated DNA repair protein (alkB homolog), putative	DNA	1765	1517	3368	2392	2677	8565	6002	3620	53	55	89	84	101	108	106	158
Tb927.11.5470	hypothetical protein, conserved	ZUnknown	1767	1013	1201	780	1098	3176	3014	1694	53	37	32	27	41	40	53	74
Tb927.11.7040	pterin-4-alpha-carbinolamine dehydratase, putative	Folate	1767	1314	2162	1644	3164	10652	7383	4507	53	47	57	58	119	134	130	196
Tb927.11.7830	hypothetical protein, conserved	ZUnknown	1767	1466	2327	1571	2177	6459	5230	2419	53	53	62	55	82	81	92	105
Tb11.02.5360	hypothetical protein, conserved	ZUnknown	1768	1292	2748	1689	1984	5209	4340	2040	53	47	73	59	75	65	76	89
Tb927.10.2200	hypothetical protein, conserved	ZUnknown	1768	1528	2894	2150	2040	5543	4715	1727	53	55	77	76	77	70	83	75
Tb927.11.1550	XRNF	RNA.degradation	1768	1455	2518	1649	1400	3907	3329	1129	53	52	67	58	53	49	59	49
Tb927.10.5140	protein kinase, putative,mitogen-activated protein kinase 2, putative	Protein.kinase	1769	895	587	293	422	836	673	118	53	32	16	10	16	11	12	5
Tb927.3.1430	chaperone protein DNAj, putative	Chaperone	1769	1571	1378	895	1149	3098	2394	819	53	57	36	31	43	39	42	36
Tb927.11.15440	NADH-ubiquinone oxidoreductase complex I subunit, putative	Mito.e.transport	1770	1151	2449	1881	2737	8707	6693	4482	53	41	65	66	103	109	118	195
Tb927.7.4410	hypothetical protein, conserved	ZUnknown	1770	1149	1185	990	948	2424	1604	257	53	41	31	35	36	30	28	11
Tb927.1.1220	RWD domain-containing protein	ZUnknown	1772	1329	2436	1517	1444	4288	3145	1133	53	48	64	53	54	54	55	49
Tb927.10.2050	hypothetical protein, conserved	ZUnknown	1772	1152	4152	3284	2919	7964	5323	1827	53	42	110	116	110	100	94	80
Tb927.4.1440	probable rRNA maturation factor YbeY, putative	Mito.pathway	1772	1329	2042	1545	1821	5434	3940	1973	53	48	54	54	69	68	69	86
Tb927.5.2300	formin, putative	ZUnknown	1772	1625	1257	840	815	2272	1737	284	53	59	33	30	31	29	31	12
Tb927.4.680	hypothetical protein, conserved	ZUnknown	1773	1608	2290	1705	1781	4775	3646	1436	53	58	61	60	67	60	64	63
Tb927.8.1900	hypothetical protein, conserved	ZUnknown	1773	1604	1711	1172	1303	3339	2899	1107	53	58	45	41	49	42	51	48
Tb927.9.2060	ADP-ribosylation factor family, putative	ZUnknown	1773	1278	2016	1593	1300	3419	2624	905	53	46	53	56	49	43	46	39
Tb927.10.10700	splicing factor Prp31	RNA.processing	1775	1195	2761	1802	1852	5474	3793	878	53	43	73	63	70	69	67	38
Tb927.10.9590	hypothetical protein, conserved	ZUnknown	1775	1051	1975	1450	1755	4806	3463	1308	53	38	52	51	66	60	61	57
Tb927.11.10940	hypothetical protein, conserved, no domains	ZUnknown	1776	1029	551	363	415	953	670	120	53	37	15	13	16	12	12	5
Tb927.11.540	ABC transporter, putative	Transporter	1776	1437	1940	1388	1034	2621	2425	466	53	52	51	49	39	33	43	20
Tb927.3.5170	hypothetical protein, conserved	ZUnknown	1776	1103	1228	1018	770	2045	1466	660	53	40	32	36	29	26	26	29
Tb927.4.4750	hypothetical protein, conserved	ZUnknown	1776	1547	2415	1726	2012	5886	4965	1973	53	56	64	61	76	74	87	86
Tb927.10.10810	adenosine deaminase-like protein	Nucleotides	1777	601	679	534	560	1099	989	297	53	22	18	19	21	14	17	13
Tb927.10.15220	hypothetical protein, conserved, potential ER localized	Vesicular.transport	1778	1935	6788	5423	3524	10296	6296	3100	53	70	179	191	133	129	111	135
Tb927.1.4730	Ribonuclease H2 non-catalytic subunit (Ylr154p-like), putative	ZUnknown	1780	1636	3176	2480	2326	8026	5886	3434	53	59	84	87	88	101	104	150
Tb927.10.4690	dynein light chain, putative	Cytoskeleton	1780	1837	1986	1638	1717	5859	4696	2461	53	66	53	58	65	74	83	107
Tb927.4.4220	small GTP-binding rab protein, putative (TbRX2)	Vesicular.transport	1780	1056	1284	801	1056	2500	1697	222	53	38	34	28	40	31	30	10
Tb927.7.1630	hypothetical protein, conserved	ZUnknown	1780	1438	6667	4458	4860	15611	7778	4877	53	52	176	157	183	196	137	212
Tb927.10.11520	hypothetical protein, conserved	Mito.pathway	1781	1792	4677	3704	2946	8873	5859	3314	53	65	124	130	111	111	103	144
Tb927.9.7740	lipid-like atypical dual specificity phosphatase, putative	Lipids	1781	1085	1254	1018	810	1857	1428	397	53	39	33	36	31	23	25	17
Tb927.11.3950	hypothetical protein, conserved	ZUnknown	1785	1039	1521	1121	1036	3206	2533	912	53	37	40	39	39	40	45	40
Tb927.4.1890	hypothetical protein, conserved	ZUnknown	1786	1656	2292	1555	1623	5077	3419	1468	53	60	61	55	61	64	60	64
Tb927.4.2270	Histone-like transcription factor (CBF/NF-Y) and archaeal histone, putative	ZUnknown	1787	1625	2321	1689	1630	4535	3625	1398	53	59	61	59	61	57	64	61
Tb927.6.1590	conserved protein	Mito.pathway	1787	1015	2338	1605	1484	3712	2956	903	53	37	62	56	56	47	52	39
Tb927.10.7770	hypothetical protein	ZUnknown	1789	1216	1317	807	1053	2903	2633	836	53	44	35	28	40	36	46	36
Tb927.11.10360	hypothetical protein, conserved	ZUnknown	1789	1063	1151	933	814	1975	1278	370	53	38	30	33	31	25	23	16
Tb927.11.3430	hypothetical protein, conserved	ZUnknown	1789	1713	1714	1230	1497	4115	3751	1389	53	62	45	43	56	52	66	61
Tb927.10.10820	hypothetical protein, conserved	ZUnknown	1790	990	2701	1982	2067	6261	4574	2455	53	36	71	70	78	79	81	107
Tb927.8.5810	mitochondrial carrier protein, MCP24	Mito.transport	1790	1012	2276	1813	2046	5424	3899	1103	53	36	60	64	77	68	69	48
Tb927.9.2280	hypothetical protein, conserved	ZUnknown	1790	1608	2469	2077	2068	7257	5000	3528	53	58	65	73	78	91	88	154
Tb927.10.1130	dynein arm light chain, axonemal, putative	Cytoskeleton	1792	2539	2910	2332	2102	5928	3899	1368	53	92	77	82	79	74	69	60
Tb927.11.9470	ADP-ribosylation factor GTPase activating protein, putative	Vesicular.transport	1792	1282	1913	1575	1798	4974	2689	608	53	46	51	55	68	62	47	26
Tb927.9.1950	hypothetical protein, conserved	Mito.pathway	1793	1559	2747	1851	2279	6829	4964	2514	54	56	73	65	86	86	87	110
Tb927.10.14800	MAPK9 protein kinase	Protein.kinase	1794	1249	1135	810	794	1764	1331	296	54	45	30	28	30	22	23	13
Tb927.11.3110	hypothetical protein, conserved	ZUnknown	1795	1350	1476	1089	1097	3092	2320	977	54	49	39	38	41	39	41	43
Tb927.7.6650	Colon cancer-associated protein Mic1-like, putative	ZUnknown	1795	735	417	221	352	651	510	185	54	26	11	8	13	8	9	8
Tb927.10.12160	hypothetical protein, conserved	ZUnknown	1796	1056	1717	1277	1702	5293	5327	2791	54	38	45	45	64	66	94	122
Tb927.11.10600	hypothetical protein, conserved	ZUnknown	1796	752	2416	1947	1671	4557	2592	479	54	27	64	68	63	57	46	21
Tb927.4.1900	Methyltransferase domain/Methyltransferase involved in Williams-Beuren syndrome, putative	ZUnknown	1796	1562	3419	2654	1785	4204	3319	984	54	56	90	93	67	53	58	43
Tb927.6.3470	hypothetical protein, conserved	ZUnknown	1796	1863	1953	1357	1379	4591	3600	1582	54	67	52	48	52	58	63	69
Tb927.10.14900	hypothetical protein, conserved	ZUnknown	1799	927	993	689	683	1484	1156	243	54	33	26	24	26	19	20	11
Tb927.11.9350	phosphonopyruvate decarboxylase-like protein, putative	Glucose.glycerol	1800	671	2673	1946	2145	5868	3913	1719	54	24	71	68	81	74	69	75
Tb927.8.2990	5-formyltetrahydrofolate cyclo-ligase family, putative	ZUnknown	1800	989	2816	1940	2150	6171	4782	2529	54	36	74	68	81	78	84	110
Tb927.10.1740	hypothetical protein, conserved	ZUnknown	1802	1129	2991	2319	1940	5969	4485	1723	54	41	79	82	73	75	79	75
Tb927.10.11450	TFIIF-stimulated CTD phosphatase, putative	Protein.phosphatase	1803	696	436	262	306	564	519	160	54	25	12	9	12	7	9	7
Tb927.9.1420	hypothetical protein, conserved	ZUnknown	1804	1538	2019	1357	1696	4729	3961	1245	54	55	53	48	64	59	70	54
Tb927.6.2080	Mitchondrial SSU ribosomal associated KRIPP22 (PPR)	Mito.translation	1805	867	3473	2452	1789	4631	3322	865	54	31	92	86	67	58	59	38
Tb927.11.16300	hypothetical protein, conserved	ZUnknown	1806	869	3506	2983	1442	3759	2897	757	54	31	93	105	54	47	51	33
Tb927.5.2120	hypothetical protein, conserved, trypanosome-specific	ZUnknown	1806	639	435	323	336	735	525	147	54	23	11	11	13	9	9	6
Tb927.8.4420	hypothetical protein, conserved	ZUnknown	1807	1455	2834	1958	3036	9614	6817	4351	54	52	75	69	114	121	120	190
Tb927.9.2050	membrane protein YIP1, putative	Vesicular.transport	1807	693	415	406	379	972	734	145	54	25	11	14	14	12	13	6
Tb927.10.1610	hypothetical protein, conserved	ZUnknown	1808	1368	2152	1822	1454	3477	2559	843	54	49	57	64	55	44	45	37
Tb927.8.4910	hypothetical protein, conserved	ZUnknown	1808	1561	2758	2045	2140	7493	5311	3447	54	56	73	72	81	94	94	150
Tb927.10.12630	hypothetical protein, conserved	ZUnknown	1809	1858	2172	1774	1517	5013	4023	1912	54	67	57	62	57	63	71	83
Tb927.6.670	RRP45 exosome complex PH subunit	RNA.degradation	1809	1433	2999	2137	1732	4456	3443	1356	54	52	79	75	65	56	61	59
Tb927.11.4060	leucine-rich repeat protein (LRRP)	LRRP	1811	1445	49	30	435	1367	1479	701	54	52	1	1	16	17	26	31
Tb927.8.2330	hypothetical protein, conserved	ZUnknown	1812	1083	2603	2100	1225	3032	2340	593	54	39	69	74	46	38	41	26
Tb927.4.4110	hypothetical protein, conserved	ZUnknown	1813	914	1344	961	1342	4040	2928	949	54	33	36	34	51	51	52	41
Tb927.7.6320	BTB/POZ domain/Regulator of chromosome condensation (RCC1) repeat, putative	ZUnknown	1813	1000	999	671	773	1554	1386	377	54	36	26	24	29	20	24	16
Tb927.11.2080	hypothetical protein, conserved	ZUnknown	1814	1245	2809	2039	1903	4580	3606	1232	54	45	74	72	72	58	64	54
Tb927.4.2940	hypothetical protein, conserved	ZUnknown	1814	1088	1839	1397	1668	4834	4024	1525	54	39	49	49	63	61	71	66
Tb927.6.3440	hypothetical protein, conserved	ZUnknown	1814	1382	2750	2086	1837	5929	4821	2338	54	50	73	73	69	74	85	102
Tb927.6.1410	hypothetical protein, conserved	Mito.pathway	1815	1636	1789	1249	1579	4651	3706	1812	54	59	47	44	60	58	65	79
Tb927.8.7000	E1-like ubiquitin-activating enzyme, putative (ATG10)	Ubiquitin.proteasome	1815	1156	3585	2870	2946	9502	6947	4851	54	42	95	101	111	119	122	211
Tb927.11.11170	hypothetical protein, conserved	ZUnknown	1816	873	3371	2646	3317	10250	9025	5313	54	31	89	93	125	129	159	231
Tb927.9.12150	transport protein particle (TRAPP) subunit, putative	Vesicular.transport	1816	1365	2990	2408	2269	7142	5553	2939	54	49	79	85	86	90	98	128
Tb927.9.2980	hypothetical protein, conserved	ZUnknown	1816	1544	2390	1820	1700	5483	3940	1723	54	56	63	64	64	69	69	75
Tb927.9.6060	Erv homologue, FAD-linked sulfhydryl oxidase, POMP4	Mito.Biogenesis	1816	1189	2535	1698	1512	4180	2923	873	54	43	67	60	57	53	51	38
Tb927.11.8180	hypothetical protein, conserved	ZUnknown	1817	1582	2641	1880	1758	4684	3686	1376	54	57	70	66	66	59	65	60
Tb927.9.10630	hypothetical protein, conserved	ZUnknown	1817	1826	2222	1367	1854	5024	3433	755	54	66	59	48	70	63	60	33
Tb927.5.3090	Mitochondrial ATP synthase subunit, putative	Mito.pathway	1818	1758	12124	9509	6051	21310	12955	6815	54	63	321	335	228	268	228	297
Tb927.8.6470	SET domain containing protein, putative	ZUnknown	1818	564	684	487	484	1301	897	273	54	20	18	17	18	16	16	12
Tb927.10.12210	ribulose-5-phosphate 3-epimerase, putative	PPP	1819	759	4596	3621	2670	8664	6234	2522	54	27	121	127	101	109	110	110
Tb927.6.590	hypothetical protein, conserved	Mito.pathway	1819	1904	6832	4965	3871	12134	7295	3154	54	69	181	175	146	152	128	137
Tb927.3.3100	peptidyl-prolyl cis-trans isomerase NIMA-interacting 4, putative	Chaperone	1820	1122	3674	2887	2485	7627	4988	2761	54	40	97	102	94	96	88	120
Tb927.11.3160	hypothetical protein, conserved	ZUnknown	1821	953	2630	1957	1886	5430	3158	1432	54	34	70	69	71	68	56	62
Tb927.7.4840	hypothetical protein, conserved	ZUnknown	1821	1553	2075	1501	1498	4927	4103	1770	54	56	55	53	56	62	72	77
Tb927.8.5420	methyltransferase domain containing protein, putative	Mito.pathway	1821	1135	4351	3112	2272	5972	4139	1386	54	41	115	109	86	75	73	60
Tb927.10.16110	CMF1, possible component of motile flagella	Cytoskeleton	1822	1273	2882	2182	1531	4026	2937	761	54	46	76	77	58	51	52	33
Tb927.7.3310	hypothetical protein, conserved	ZUnknown	1822	1208	1444	1218	934	2290	1500	462	54	44	38	43	35	29	26	20
Tb927.8.3280	Beta-lactamase superfamily domain containing protein, putative	ZUnknown	1823	1328	1981	1428	1138	2822	1872	401	54	48	52	50	43	35	33	17
Tb927.10.4620	peptidyl-prolyl cis-trans isomerase, putative (PPIase)	Chaperone	1824	1513	4924	4108	4219	13986	8890	5730	54	55	130	145	159	176	157	250
Tb927.4.3820	hypothetical protein, conserved	ZUnknown	1824	1098	1245	883	964	2111	1922	490	54	40	33	31	36	27	34	21
Tb927.9.10050	60Kd inner membrane protein, putative	ZUnknown	1824	776	1343	981	1048	2338	2091	508	54	28	36	35	39	29	37	22
Tb927.10.510	ATOM19 (=LOK1=POMP19)	Mito.biogenesis	1825	1598	4750	3209	2097	5169	3730	913	54	58	126	113	79	65	66	40
Tb927.2.3610	Mitochondrial ATP synthase subunit, putative	Mito.pathway	1825	1719	6044	4669	2928	10109	6899	3066	54	62	160	164	110	127	122	134
Tb927.3.1810	hypothetical protein, conserved, no domains, no yeast or human match	ZUnknown	1825	1794	2702	1966	2138	5859	4559	1362	54	65	71	69	81	74	80	59
Tb927.6.3830	hypothetical protein, conserved	ZUnknown	1825	1377	2155	1411	1343	4062	4255	1077	54	50	57	50	51	51	75	47
Tb927.11.1690	Emopamil binding protein, putative	ZUnknown	1828	1482	7951	5769	3725	10742	7800	4593	55	53	210	203	140	135	137	200
Tb927.4.3800	hypothetical protein, conserved	ZUnknown	1828	1585	1262	884	976	2732	2532	613	55	57	33	31	37	34	45	27
Tb927.10.8410	hypothetical protein, conserved	ZUnknown	1829	824	2784	2149	1445	3833	3090	1236	55	30	74	76	54	48	54	54
Tb927.7.3960	Mitchondrial LSU ribosomal protein L16, putative	Mito.translation	1829	1391	3372	2858	2557	7777	6057	2039	55	50	89	101	96	98	107	89
Tb927.11.12440	Plus-3 domain/Zinc finger, C3HC4 type (RING finger), putative	ZUnknown	1830	1344	1960	1496	1133	3058	2032	296	55	48	52	53	43	38	36	13
Tb927.7.5810	Protein of unknown function (DUF1637), putative	ZUnknown	1830	1633	3159	2327	2140	6748	5312	2695	55	59	84	82	81	85	94	117
Tb927.11.13900	Centrin5	Cell.cycle	1831	1550	2088	1560	1692	5651	3936	2256	55	56	55	55	64	71	69	98
Tb927.11.4730	hypothetical protein, conserved	ZUnknown	1831	1309	1381	1034	1103	2849	2684	631	55	47	37	36	42	36	47	27
Tb927.8.8120	hypothetical protein, conserved	ZUnknown	1831	1356	2533	2006	2101	6032	3535	952	55	49	67	71	79	76	62	41
Tb927.7.3080	hypothetical protein, conserved, kinetoplastid-specific	ZUnknown	1832	1366	1384	1027	1017	2580	2111	558	55	49	37	36	38	32	37	24
Tb927.9.12100	Tetrapyrrole (Corrin/Porphyrin) Methylases, putative	ZUnknown	1832	1182	1926	1291	1704	4962	4174	1641	55	43	51	45	64	62	74	71
Tb927.1.1980	Protein transport protein yif1, putative	Vesicular.transport	1833	1477	1753	1471	1578	5147	3736	1912	55	53	46	52	59	65	66	83
Tb927.8.4250	hypothetical protein, conserved	Mito.pathway	1833	1538	3968	2644	2364	6754	4779	1856	55	55	105	93	89	85	84	81
Tb927.11.9960	Protein of unknown function (DUF2870), putative	ZUnknown	1836	998	2054	1471	1304	3574	2563	565	55	36	54	52	49	45	45	25
Tb927.2.5120	vesicle-associated membrane protein, in Tc vacuolar proteome	Vesicular.transport	1836	1336	3895	2864	3453	11169	8748	5551	55	48	103	101	130	140	154	242
Tb927.8.6440	RBP20	RNA.binding	1836	1659	1809	1338	1341	3858	3103	877	55	60	48	47	51	48	55	38
Tb927.11.6800	hypothetical protein, conserved	ZUnknown	1838	1705	1240	898	1614	4844	4375	1077	55	61	33	32	61	61	77	47
Tb927.9.5220	conserved protein	ZUnknown	1838	1531	900	672	1912	5927	4221	2367	55	55	24	24	72	74	74	103
Tb927.4.4620	cytochrome oxidase subunit VIII (COXVIII)	Mito.e.transport	1839	1061	24178	18847	11389	37242	24118	12542	55	38	639	663	429	468	425	546
Tb927.8.8040	kinetoplastid-specific phospho-protein phosphatase, putative	Protein.phosphatase	1840	1473	2371	1707	1752	5079	4147	1291	55	53	63	60	66	64	73	56
Tb927.11.16200	microtubule-associated protein,corset-associated protein 17 (CAP17)	Cytoskeleton	1841	1525	32155	25538	6468	22495	16478	6010	55	55	850	898	244	283	290	262
Tb927.9.5350	actin related protein 3, putative	Cytoskeleton	1841	1143	1235	922	1101	3057	2269	643	55	41	33	32	41	38	40	28
Tb927.7.2520	Uncharacterised protein family UPF0066, putative	ZUnknown	1842	1589	2892	2160	2506	7027	5778	2228	55	57	76	76	94	88	102	97
Tb927.4.2440	hypothetical protein, very weak match to yeast ribosomal protein RSM23	Mito.pathway	1843	1344	3798	2598	2607	7904	6065	2330	55	48	100	91	98	99	107	101
Tb927.4.3520	Amastin surface glycoprotein, putative	ZUnknown	1844	901	5436	4269	5029	17306	11487	7520	55	32	144	150	190	217	202	328
Tb927.8.1670	NEK14 protein kinase	Protein.kinase	1844	785	303	287	289	832	479	190	55	28	8	10	11	10	8	8
Tb927.10.9010	leucine-rich repeat protein (LRRP)	LRRP	1845	1125	2197	1577	1870	5855	5636	3311	55	41	58	55	70	74	99	144
Tb927.9.14440	hypothetical protein	ZUnknown	1845	1156	3516	2450	2990	8731	6734	3572	55	42	93	86	113	110	119	156
Tb927.9.9020	ribosome-interacting GTPase 2, putative	Translation	1845	1683	2006	1410	1259	3771	3038	874	55	61	53	50	47	47	54	38
Tb927.1.3390	Eukaryotic protein of unknown function (DUF866), putative	ZUnknown	1846	2420	3601	2799	2121	6515	4155	2531	55	87	95	98	80	82	73	110
Tb927.10.1300	hypothetical protein, conserved, no homologues	ZUnknown	1846	1205	2255	1793	2252	7010	5091	2443	55	43	60	63	85	88	90	106
Tb927.10.3080	methionine biosynthetic protein, putative	Protease	1847	1431	2363	1578	1752	5006	3953	2237	55	52	62	56	66	63	70	97
Tb927.11.12760	hypothetical protein, conserved	ZUnknown	1847	1384	3112	2410	2035	4866	3690	1448	55	50	82	85	77	61	65	63
Tb927.9.2390	hypothetical protein, conserved	ZUnknown	1849	1204	8429	5925	5276	16825	11379	6368	55	43	223	208	199	211	200	277
Tb927.11.15500	Mitchondrial LSU ribosomal protein	Mito.translation	1850	1449	4154	3027	2342	6602	4301	968	55	52	110	106	88	83	76	42
Tb927.7.280	cyclophilin-type peptidyl-prolyl cis-trans isomerase, putative (PPIase)	Chaperone	1850	1562	6182	4880	3366	9737	6479	3778	55	56	163	172	127	122	114	165
Tb927.7.7340	hypothetical protein, conserved	ZUnknown	1850	967	1224	1067	939	2352	1621	564	55	35	32	38	35	30	29	25
Tb927.9.11360	hypothetical protein, conserved	ZUnknown	1850	1201	2419	1749	1571	4866	3837	1818	55	43	64	62	59	61	68	79
Tb927.11.1330	Stress responsive A/B Barrel Domain, putative	ZUnknown	1851	2114	4446	3314	2674	9557	5913	3555	55	76	118	117	101	120	104	155
Tb927.10.2550	malate dehydrogenase-related	Mito.e.transport	1852	1372	2498	1591	1628	4683	4163	1968	55	49	66	56	61	59	73	86
Tb927.10.15850	PEX12 peroxisome assembly protein	Glycosome	1853	603	814	785	607	1785	1058	367	55	22	22	28	23	22	19	16
Tb927.11.7230	palmitoyl acyltransferase 8, putative	Lipids	1854	940	1421	956	1939	5986	5030	2957	55	34	38	34	73	75	89	129
Tb927.2.4720	dolichyl-P-Man:GDP-Man7GlcNAc2-PP-dolichyl alpha-1,6-mannosyltransferase, putative	Glycans	1854	1338	1602	1056	1144	2624	2313	772	55	48	42	37	43	33	41	34
Tb927.3.2410	PEX10 peroxisome assembly protein	Glycosome	1854	1795	3151	2457	2290	6233	3952	1272	55	65	83	86	86	78	70	55
Tb927.5.2440	CEP164	Cytoskeleton	1854	2508	955	621	803	2380	1961	279	55	90	25	22	30	30	35	12
Tb927.2.4560	TBC-D2 likely GAP	Signalling	1855	1271	998	767	889	2136	1660	451	55	46	26	27	34	27	29	20
Tb927.11.4020	Complex1_LYR-like, putative	ZUnknown	1856	1838	2722	2068	2408	8454	5358	2959	55	66	72	73	91	106	94	129
Tb927.10.15790	CHCH domain containing protein, putative	ZUnknown	1857	1544	5268	4299	3739	12174	8057	4217	55	56	139	151	141	153	142	184
Tb927.5.2420	NOL1/NOP2/sun family, putative	ZUnknown	1857	2277	2025	1756	1151	2909	1969	599	55	82	54	62	43	37	35	26
Tb927.3.810	hypothetical protein, conserved	ZUnknown	1859	1250	2660	1858	2155	6177	5130	1840	55	45	70	65	81	78	90	80
Tb927.4.3580	Transcription factor Pcc1, putative	ZUnknown	1859	1539	2614	2062	2305	7265	5295	3408	55	55	69	73	87	91	93	148
Tb927.8.5270	hypothetical protein, conserved	ZUnknown	1859	1623	1134	801	2356	8135	6399	3635	55	59	30	28	89	102	113	158
Tb927.3.1100	exonuclease, putative	ZUnknown	1860	1519	2727	1891	2171	6515	4452	1664	56	55	72	67	82	82	78	72
Tb927.10.2820	hypothetical protein, conserved	ZUnknown	1862	1572	1781	1248	1427	3689	3455	1288	56	57	47	44	54	46	61	56
Tb927.9.14170	hypothetical protein, conserved	ZUnknown	1862	1386	1071	674	1322	3516	2824	709	56	50	28	24	50	44	50	31
Tb927.11.10620	hypothetical protein, conserved	ZUnknown	1865	1877	1745	1438	1531	5191	3842	1863	56	68	46	51	58	65	68	81
Tb927.3.660	hypothetical protein, conserved	ZUnknown	1865	1589	2664	2017	2190	6101	5440	3536	56	57	70	71	83	77	96	154
Tb927.1.1230	chaperone protein DNAj, putative	Chaperone	1866	1389	2103	1509	1669	4315	3700	1126	56	50	56	53	63	54	65	49
Tb927.10.4680	NUDIX hydrolase, conserved,predicted MutT/NUDIX family protein	Enzyme	1866	1284	2890	2090	2939	9043	7496	3820	56	46	76	74	111	114	132	166
Tb927.3.5480	hypothetical protein, conserved	ZUnknown	1866	2167	1912	1315	2275	6548	5820	3568	56	78	51	46	86	82	102	155
Tb927.10.4240	hypothetical protein, conserved	Mito.pathway	1867	1905	9231	7263	4826	16250	10340	6124	56	69	244	256	182	204	182	267
Tb927.3.4380	Tob55, SAM50	Mito.biogenesis	1867	1744	2479	1639	1635	4654	3764	1326	56	63	66	58	62	58	66	58
Tb927.11.12610	CYC1, cyclin 1	Cell.cycle	1868	1228	1998	1355	1392	3946	2765	538	56	44	53	48	52	50	49	23
Tb927.11.6990	protein kinase, putative,serine/threonine protein kinase, putative	Protein.kinase	1868	852	622	478	479	1013	769	132	56	31	16	17	18	13	14	6
Tb927.9.11760	DNA repair protein XPG, RAD2, putative	DNA	1868	689	1684	1208	1396	3963	3327	1716	56	25	45	42	53	50	59	75
Tb927.10.7130	hypothetical protein, conserved	ZUnknown	1869	853	1263	1092	907	2229	1569	404	56	31	33	38	34	28	28	18
Tb927.10.9260	hypothetical protein, conserved	ZUnknown	1869	1434	4285	3495	2143	6192	4775	1515	56	52	113	123	81	78	84	66
Tb927.11.8110	hypothetical protein, conserved	ZUnknown	1869	1207	2545	1799	1666	4447	3593	1313	56	44	67	63	63	56	63	57
Tb927.10.6710	hypothetical protein, conserved	ZUnknown	1870	764	2451	1679	2075	6075	4290	1288	56	28	65	59	78	76	76	56
Tb927.1.4680	hypothetical protein, conserved	ZUnknown	1871	1829	2312	1708	1716	4473	3648	1031	56	66	61	60	65	56	64	45
Tb927.10.15870	RNA binding protein, putative, SWAP domain	RNA.binding	1871	1204	2702	2246	2688	8053	6774	4442	56	43	71	79	101	101	119	193
Tb927.10.4140	Protein of unknown function (DUF1242), putative	ZUnknown	1871	1168	2962	2216	3330	11244	7209	5171	56	42	78	78	125	141	127	225
Tb927.3.1400	alpha-tubulin N-acetyltransferase, putative	Cytoskeleton	1871	1801	2100	1432	2031	5927	4415	1661	56	65	56	50	77	74	78	72
Tb927.10.11100	deoxyribodipyrimidine photolyase, putative,DNA repair enzyme, putative	DNA	1872	508	2754	1954	2277	5780	3894	1107	56	18	73	69	86	73	69	48
Tb927.11.4150	hypothetical protein, conserved	ZUnknown	1872	1041	1662	1407	894	1960	1497	463	56	38	44	49	34	25	26	20
Tb927.11.11030	EAP4 exosome-associated protein 4	RNA.degradation	1873	1362	2925	2211	2573	8301	6852	3990	56	49	77	78	97	104	121	174
Tb927.2.5410	ABC transporter, putative	Transporter	1873	358	1259	1005	1164	2995	2067	856	56	13	33	35	44	38	36	37
Tb927.5.2500	hypothetical protein, conserved	ZUnknown	1873	2058	681	588	638	1462	1541	269	56	74	18	21	24	18	27	12
Tb927.9.7830	mitochondrial tRNA import complex, putative	Mito.biogenesis	1873	1560	31034	23765	11448	39685	23113	9743	56	56	820	836	431	498	407	424
Tb927.6.3530	hypothetical protein, conserved, MItochondrial carrier superfamiiy domain	ZUnknown	1874	1626	3090	2176	2264	6459	5492	3274	56	59	82	77	85	81	97	143
Tb927.7.3150	CRAL/TRIO domain containing protein, putative	ZUnknown	1874	1448	1623	1004	1521	3852	3580	900	56	52	43	35	57	48	63	39
Tb927.8.1450	hypothetical protein, conserved	ZUnknown	1876	1073	2643	1918	1761	4344	2990	910	56	39	70	67	66	55	53	40
Tb927.9.9990	kinetoplastid-specific dual specificity phosphatase, putative	Phosphatase	1876	1246	1286	1097	1076	2611	1731	506	56	45	34	39	41	33	30	22
Tb927.10.2150	Protein of unknown function, DUF607, putative	ZUnknown	1877	1417	2450	1713	2903	8743	7236	4759	56	51	65	60	109	110	127	207
Tb927.7.7150	hypothetical protein, conserved	ZUnknown	1877	1753	1424	1005	1026	2532	1975	398	56	63	38	35	39	32	35	17
Tb927.8.3730	COPI associated protein, putative	ZUnknown	1877	2139	947	704	1745	5532	4405	2923	56	77	25	25	66	69	78	127
Tb927.9.11750	methyltransferase domain containing protein, putative	ZUnknown	1877	1278	2493	1822	1441	3764	2754	1157	56	46	66	64	54	47	49	50
Tb927.4.1260	hypothetical protein, conserved	ZUnknown	1878	1139	2241	1979	1668	4824	2897	792	56	41	59	70	63	61	51	34
Tb927.7.1350	PPR repeat family, putative	ZUnknown	1878	1583	3865	2625	2536	6841	5371	1996	56	57	102	92	96	86	95	87
Tb927.10.12050	Mitchondrial LSU ribosomal protein	Mito.translation	1879	1419	2562	1673	1805	5398	4700	1997	56	51	68	59	68	68	83	87
Tb927.4.580	hypothetical protein, conserved	ZUnknown	1879	1590	1720	1025	1483	4082	3812	1299	56	57	45	36	56	51	67	57
Tb927.9.14050	Mitchondrial LSU ribosomal protein	Mito.translation	1879	588	1135	911	841	1714	1226	321	56	21	30	32	32	22	22	14
Tb927.11.16430	18 kDa ER-associated protein (ERAP18)	Vesicular.transport	1880	948	3802	3381	3347	11176	10718	7015	56	34	101	119	126	140	189	306
Tb927.7.6920	hypothetical protein, conserved	ZUnknown	1880	1268	768	498	420	939	979	200	56	46	20	18	16	12	17	9
Tb927.10.5970	predicted zinc finger protein	ZUnknown	1881	1614	1781	1226	1419	3878	3228	826	56	58	47	43	53	49	57	36
Tb927.4.2590	hypothetical protein, conserved	ZUnknown	1882	1064	1406	866	1188	2600	2139	465	56	38	37	30	45	33	38	20
Tb927.5.2030	hypothetical protein, conserved	ZUnknown	1883	542	3487	2890	2304	5786	3011	824	56	20	92	102	87	73	53	36
Tb927.9.13580	hypothetical protein, conserved	Mito.pathway	1883	1414	4798	3722	2007	5720	3792	620	56	51	127	131	76	72	67	27
Tb927.5.2050	Putative methyltransferase, putative	ZUnknown	1885	1030	1311	1077	928	2030	1509	488	56	37	35	38	35	25	27	21
Tb927.11.13420	PPPDE putative peptidase domain containing protein, putative	ZUnknown	1886	1406	1375	1056	1215	3141	2412	725	56	51	36	37	46	39	42	32
Tb927.4.4540	zinc finger domain, LSD1 subclass, putative	Zinc.finger	1886	1606	861	550	1116	3220	2259	877	56	58	23	19	42	40	40	38
Tb927.10.15800	actin related protein 2, putative	Cytoskeleton	1887	1518	2682	1942	1903	5038	4486	1791	56	55	71	68	72	63	79	78
Tb927.11.12060	Peroxisomal biogenesis factor 11 (PEX11), putative	ZUnknown	1889	1924	1820	1298	2089	6816	6236	3681	56	69	48	46	79	86	110	160
Tb927.4.4600	Mitchondrial LSU ribosomal protein L51/S25	Mito.translation	1889	1659	4908	3626	3077	9429	6507	3096	56	60	130	128	116	118	115	135
Tb927.9.2030	AAA ATPase domain containing protein, putative	ZUnknown	1889	1095	953	775	570	1616	1023	286	56	39	25	27	21	20	18	12
Tb11.02.5370	hypothetical protein, conserved	ZUnknown	1890	1494	3994	2868	2550	6499	4878	1937	56	54	106	101	96	82	86	84
Tb927.1.820	kelch domain-containing protein	ZUnknown	1890	1339	1777	1377	1268	3057	2160	548	56	48	47	48	48	38	38	24
Tb927.8.5120	cytochrome c	Mito.e.transport	1892	2455	20407	16042	5997	20528	11509	3204	56	89	539	564	226	258	203	140
Tb927.11.850	protein kinase, putative	Protein.kinase	1893	1465	2951	2316	2441	6481	5419	2639	56	53	78	81	92	81	95	115
Tb927.6.4120	TBC-E likely GAP	Signalling	1893	1746	2403	1739	2009	5597	4508	2714	56	63	64	61	76	70	79	118
Tb927.9.12680	hypothetical protein, conserved, weak ubiquinone oxidoreductase subunit domain	ZUnknown	1894	1391	5668	4289	3107	9361	7546	3714	57	50	150	151	117	118	133	162
Tb927.10.15830	hypothetical protein, conserved	ZUnknown	1895	1189	3672	2869	2865	8040	5810	2012	57	43	97	101	108	101	102	88
Tb927.1.2760	hypothetical protein	ZUnknown	1897	1457	1550	1356	1259	3381	2335	704	57	53	41	48	47	42	41	31
Tb927.10.11560	hypothetical protein, conserved	ZUnknown	1897	1052	1485	1268	1297	3677	2603	620	57	38	39	45	49	46	46	27
Tb927.11.10170	Mitchondrial LSU ribosomal protein	Mito.translation	1897	1776	6133	4470	3894	11522	7957	4193	57	64	162	157	147	145	140	183
Tb927.3.4450	hypothetical protein, conserved	ZUnknown	1897	1583	2687	1677	2216	6852	5139	2181	57	57	71	59	84	86	91	95
Tb927.9.6760	hypothetical protein, conserved	ZUnknown	1897	1476	1070	945	870	2550	1471	245	57	53	28	33	33	32	26	11
Tb927.11.590	hypothetical protein, conserved	ZUnknown	1898	1058	2790	2080	2133	6041	4275	2054	57	38	74	73	80	76	75	89
[truncated: 5,004 more rows]
